# Supplementary material for: Longitudinal Metabolome-Wide Signals Prior to the Appearance of a First Islet Autoantibody in Children Participating in the TEDDY Study
Source: Oxford University Press journal article supplement (doi:10.2337/db19-0756), 2020-02-07
Supplement: db190756supplementarydata2.xlsx [file db190756supplementarydata2.xlsx]

## Sheet: Supp T1
Supplemental Table T1: Longitudinal plasma samples distribution for cases in TEDDY IA cohort by endpoint age and sample age
Age Point (Visit Month)	IA Case Endpoint Age (Visit Month)																						Total Samples
	3M	6M	9M	12M	15M	18M	21M	24M	27M	30M	33M	36M	39M	42M	45M	48M	51M	54M	57M	60M	66M	72M
3M	14	14	37	28	33	26	24	23	26	13	7	12	7	6	8	8	1	8	0	6	4	1	306
6M		14	44	29	30	23	27	19	25	16	13	12	9	8	7	8	1	8	0	6	4	0	303
9M			48	26	32	26	29	21	29	16	14	14	10	9	7	7	1	8	0	9	4	0	310
12M				29	28	29	27	22	27	15	14	17	8	7	6	6	0	6	0	9	6	0	256
15M					34	23	28	20	28	15	13	17	10	7	9	6	0	7	1	7	5	1	231
18M						31	33	19	31	15	14	16	9	7	9	8	1	5	1	9	6	0	214
21M							33	18	25	15	16	12	9	7	7	8	1	5	1	9	6	1	173
24M								26	26	13	17	14	10	5	6	6	1	7	0	7	4	0	142
27M									31	15	14	13	10	7	5	7	1	7	1	7	4	1	123
30M										19	16	13	9	6	6	7	1	7	0	8	4	0	96
33M											18	13	10	7	7	8	1	7	1	8	4	1	85
36M												16	9	7	8	7	1	6	0	7	5	1	67
39M													8	6	7	6	1	6	1	6	5	1	47
42M														7	7	7	1	7	1	5	5	1	41
45M															10	6	1	6	1	7	4	0	35
48M																7	1	8	0	8	5	1	30
51M																	1	2	0	0	0	0	3
54M																		9	1	7	5	1	23
57M																			1	1	0	0	2
60M																				9	6	1	16
63M																					0	0	0
66M																					6	1	7
69M																						0	0
72M																						1	1
Total Cases	15	18	52	35	38	35	38	27	32	19	19	17	11	10	11	8	1	10	1	10	6	1	2306

## Sheet: Supp T2
Supplemental Table T2: p-values of metabolome-wide time course differential analysis for each autoantibody
Metabolites	IAA-first	GADA-first
isoleucine	0.00480729	0.960645
valine	0.00752396	0.773478
myo-inositol	0.0140723	0.768453
leucine	0.0168362	0.834026
lyxitol	0.0225336	0.469995
citramalic acid	0.0301204	0.708061
pseudo-uridine	0.0379551	0.924377
isothreonic acid	0.0392888	0.880133
tyrosine	0.0431921	0.422663
deoxypentitol	0.0443204	0.92548
tryptophan	0.0459532	0.941457
trans-4-hydroxyproline	0.0608524	0.738265
3-aminoisobutyric acid	0.0618795	0.474697
aconitic acid	0.0624336	0.946928
uric acid	0.0737331	0.19234
xanthine	0.0749362	0.486861
diglycerol	0.0787402	0.486579
histidine	0.0868993	0.344313
uracil	0.194236	0.0240914
lysine	0.0897077	0.492506
hippuric acid	0.104233	0.739325
palmitoleic acid	0.10529	0.450741
glycine	0.118158	0.565817
phenylalanine	0.126842	0.6251
lactic acid	0.127947	0.698748
glycerol	0.133137	0.964826
glycolic acid	0.169874	0.633766
inosine	0.183457	0.272128
maltose	0.185221	0.580065
stearic acid	0.210027	0.792806
lauric acid	0.21084	0.82334
arachidonic acid	0.212179	0.0842963
palmitic acid	0.21407	0.744446
glutamine	0.221132	0.836364
lactamide	0.23598	0.604813
creatinine	0.246596	0.299588
tagatose	0.251774	0.773593
beta-alanine	0.255505	0.128307
pyruvic acid	0.259793	0.76985
cystine	0.259854	0.450034
linoleic acid	0.264835	0.34424
lactose	0.272737	0.338409
gamma-aminobutyric acid	0.275371	0.838841
2,3-dihydroxybutanoic acid NIST	0.275603	0.0810392
oleic acid	0.293062	0.349891
xylulose NIST	0.305991	0.264252
erythronic acid lactone	0.30759	0.445652
azelaic acid	0.311606	0.752004
xylose	0.315501	0.907805
tocopherol alpha-	0.323791	0.985492
1-monoolein	0.324214	0.307585
arachidic acid	0.32426	0.558092
caprylic acid	0.324626	0.542482
ribitol	0.327843	0.0711054
indoxyl sulfate	0.328555	0.943438
behenic acid	0.329827	0.748698
maleimide	0.334875	0.882072
proline	0.340324	0.000276104
galactonic acid	0.343337	0.332792
levoglucosan	0.348579	0.0345229
hydroxylamine	0.358269	0.893492
threitol	0.359633	0.837621
isoheptadecanoic acid NIST	0.372195	0.831215
ascorbic acid	0.375562	0.883857
glycerol-alpha-phosphate	0.389945	0.242487
uridine	0.394846	0.231597
2-hydroxyvaleric acid	0.40261	0.486377
5-methoxytryptamine	0.408397	0.166254
phosphoethanolamine	0.410724	0.506901
fructose	0.416965	0.353999
threonine	0.425005	0.277658
1-monostearin	0.427239	0.869904
glyceric acid	0.429813	0.79529
glutamic acid	0.431493	0.681591
alpha-ketoglutarate	0.437378	0.995965
fucose	0.439316	0.502837
cysteine	0.443266	0.868022
urea	0.475201	0.442576
pelargonic acid	0.478233	0.736449
malic acid	0.481615	0.683005
cholesterol	0.490451	0.65383
ornithine	0.501032	0.613085
capric acid	0.510615	0.355745
salicylic acid	0.515401	0.248806
alanine	0.521285	0.0335552
oxoproline	0.522855	0.230561
ethanolamine	0.525301	0.22908
serine	0.52532	0.820967
taurine	0.532673	0.303441
indole-3-lactate	0.53309	0.822158
salicylaldehyde	0.549019	0.573283
heptadecanoic acid	0.552563	0.947194
2-hydroxybutanoic acid	0.552606	0.852625
2-hydroxyglutaric acid	0.583686	0.911466
aspartic acid	0.585879	0.80615
1,2-dihydroxycylohexane NIST	0.594388	0.162103
ribose	0.598293	0.714023
nornicotine	0.599399	0.731959
tocopherol gamma-	0.613429	0.880795
aminomalonate	0.623044	0.344304
1-monopalmitin	0.630864	0.864603
adipic acid	0.664203	0.901243
fumaric acid	0.670691	0.985026
succinic acid	0.677625	0.935297
xylitol	0.683274	0.135853
gluconic acid	0.695161	0.64382
oleamide NIST	0.714732	0.648459
3-hydroxybutyric acid	0.72446	0.197137
pipecolinic acid	0.726288	0.571394
phosphate	0.740501	0.656475
2-ketoisocaproic acid	0.749674	0.849862
asparagine	0.75574	0.794301
benzylalcohol	0.785684	0.738396
glutaric acid	0.788622	0.493588
piperidone	0.790356	0.00674279
conduritol-beta-epoxide	0.803605	0.0722637
glycerol-3-galactoside	0.809608	0.716226
methionine	0.816024	0.988896
propane-1,3-diol NIST	0.818851	0.774409
epsilon-caprolactam	0.821742	0.678936
methionine sulfoxide	0.829605	0.739934
octanol NIST	0.834913	0.263162
sucrose	0.840473	0.642127
dehydroascorbic acid	0.842692	0.277068
threonic acid	0.857412	0.971427
benzoic acid	0.858248	0.811394
lactulose	0.860326	0.717467
hexitol	0.882111	0.236094
methyltetrahydrophenanthrenone NIST	0.8845	0.0993621
erythritol	0.90492	0.261029
phenylethylamine	0.91215	0.543429
methanolphosphate	0.920881	0.226116
glucose	0.924215	0.954986
2-deoxytetronic acid NIST	0.926016	0.662723
itaconic acid	0.933334	0.896863
octadecanol	0.944742	0.721299
indole-3-acetate	0.956434	0.659907
2-deoxytetronic acid	0.958655	0.283282
N-acetylmannosamine	0.960094	0.935809
1,5-anhydroglucitol	0.964356	0.655007
N-methylalanine	0.971286	0.935244
hydroxycarbamate NIST	0.972677	0.563886
2-ketoisovaleric acid	0.979052	0.965005
ribonic acid	0.98475	0.404174

## Sheet: Supp T3
Supplemental Table T3: p-values of lipidome-wide time course differential analysis for each autoantibody
Lipids	GADA-first	IAA-first
CE18:1	0.224047	0.0790789
CE18:2	0.371372	0.646046
CE18:3	0.968169	0.104379
CE20:4	0.600067	0.0145514
CE22:6	0.433417	0.0510429
Ceramided18:1/23:0	0.333305	0.668662
Ceramided40:1	0.43874	0.785275
Ceramided42:1	0.378768	0.738269
Ceramided42:2	0.442748	0.893384
Cholesterol	0.948251	0.902684
DG32:0	0.905874	0.924348
DG34:0	0.515234	0.744155
DG34:1	0.743638	0.241788
DG36:0	0.326369	0.0316429
DG36:2	0.327245	0.408264
DG36:3	0.376771	0.618277
DG38:5	0.0296741	0.962948
DG38:6	0.237499	0.884223
DG40:1	0.575457	0.362295
LPC16:0	0.802164	0.0619382
LPC18:0	0.5959	0.0949951
LPC18:1	0.327834	0.208748
LPC18:2	0.598007	0.229194
LPC20:0	0.750929	0.649086
LPC20:1	0.872838	0.154257
LPC20:2	0.788716	0.307362
PA41:4	0.503755	0.711972
PC16:0/16:0	0.920667	0.960605
PC18:1/16:0	0.874058	0.479381
PC28:0	0.556007	0.973623
PC30:0	0.998394	0.868368
PC32:0	0.968484	0.963087
PC32:1	0.300737	0.816863
PC32:2	0.638815	0.838485
PC32:3	0.950522	0.772334
PC34:0	0.757019	0.654064
PC34:2	0.707843	0.388964
PC36:0	0.370041	0.685573
PC36:1	0.437716	0.7433
PC36:2	0.288589	0.418793
PC36:3	0.455321	0.914518
PC36:4	0.197454	0.125839
PC36:5	0.728011	0.913796
PC36:6	0.383088	0.243645
PC37:2	0.446721	0.674085
PC37:3	0.52974	0.808139
PC37:4	0.346338	0.156294
PC38:2	0.89899	0.539706
PC38:4	0.566171	0.318522
PC38:5	0.359133	0.376479
PC38:6	0.261399	0.829476
PC38:8	0.842454	0.242016
PC40:2	0.914547	0.352557
PC40:5	0.638878	0.0196029
PC40:6	0.652482	0.582382
PC40:7	0.776544	0.607778
PC42:1	0.901827	0.46167
PC42:4	0.369608	0.481516
PC42:6	0.613146	0.508391
PC44:3	0.883633	0.549564
PC44:4	0.661229	0.737982
PE34:2	0.239261	0.834375
PE36:1	0.791696	0.765949
PE36:2	0.744989	0.306696
PE36:3	0.81098	0.915331
PE38:2	0.687034	0.437583
PE38:4	0.404866	0.629049
PE38:6	0.426531	0.014735
Phosphatidylglycerol29:0	0.496427	0.666748
Plasmenyl-PC34:2	0.0312642	0.29679
Plasmenyl-PC36:6	0.291713	0.860597
Plasmenyl-PC38:5	0.239627	0.0157778
Plasmenyl-PE36:3	0.38937	0.136668
Plasmenyl-PE36:5	0.0497583	0.904246
Plasmenyl-PE38:5	0.0901456	0.486185
Plasmenyl-PE40:6	0.769257	0.450624
SM33:1	0.726652	0.110376
SM34:0	0.591509	0.226922
SMd16:1/20:0	0.83418	0.0623591
SMd16:1/20:1	0.610419	0.304034
SMd18:1/14:0	0.290593	0.499579
SMd18:1/16:0	0.725508	0.0851438
SMd18:1/16:1	0.899262	0.428236
SMd18:1/20:0	0.7637	0.107815
SMd18:1/20:1	0.393428	0.195047
SMd18:1/21:0	0.497951	0.0911225
SMd18:1/22:0	0.858085	0.100957
SMd18:1/23:0	0.897098	0.107199
SMd18:1/24:0	0.635718	0.0787627
SMd18:2/23:0	0.989078	0.151478
SMd18:2/24:0	0.420263	0.398498
SMd18:2/24:1	0.982217	0.73447
TG42:0	0.412057	0.352907
TG44:1	0.464336	0.355918
TG46:0	0.773788	0.283896
TG46:1	0.519259	0.31756
TG46:2	0.710453	0.527281
TG46:3	0.689457	0.289998
TG48:0	0.618871	0.1248
TG48:1	0.664303	0.190443
TG48:2	0.752123	0.336215
TG48:3	0.680021	0.504054
TG49:0	0.367603	0.193561
TG49:1	0.399169	0.207722
TG49:2	0.468278	0.272691
TG50:0	0.448054	0.0937623
TG50:1	0.971223	0.0451279
TG50:2	0.860947	0.21799
TG50:3	0.783732	0.353051
TG50:4	0.653705	0.525737
TG50:5	0.409955	0.92782
TG51:1	0.296179	0.105767
TG51:2	0.279531	0.154973
TG51:3	0.336768	0.22044
TG51:4	0.379201	0.295876
TG52:0	0.232448	0.391327
TG52:1	0.326256	0.0888468
TG52:2	0.727273	0.0369574
TG52:3	0.68614	0.0236838
TG52:4	0.465356	0.441867
TG52:5	0.549356	0.577327
TG53:0	0.124104	0.468192
TG53:1	0.416797	0.282061
TG53:2	0.182031	0.0548357
TG53:3	0.209331	0.206356
TG53:4	0.204904	0.292065
TG53:5	0.323642	0.429859
TG54:0	0.167932	0.468545
TG54:1	0.0675092	0.197083
TG54:2	0.121537	0.0705917
TG54:3	0.142011	0.15491
TG54:4	0.331376	0.43183
TG54:5	0.108074	0.718149
TG54:6	0.0577691	0.963979
TG54:8	0.183574	0.933998
TG56:1	0.131059	0.625317
TG56:2	0.0188114	0.513138
TG56:3	0.180756	0.217023
TG56:4	0.581437	0.740956
TG56:5	0.893192	0.0225545
TG56:6	0.412806	0.647323
TG56:7	0.798453	0.226645
TG56:8	0.273175	0.0609711
TG58:1	0.0943672	0.957959
TG58:2	0.0249761	0.758096
TG58:3	0.146001	0.934989
TG58:4	0.049779	0.49915
TG58:6	0.43738	0.600438
TG58:8	0.852405	0.186555
TG58:9	0.288872	0.411769
TG60:1	0.111157	0.878405
TG60:11	0.536787	0.569916
TG60:2	0.125793	0.88155
TG62:1	0.682325	0.631909
Cer(d18:1/16:0)	0.465955	0.753145
Cer(d18:1/22:0)	0.724989	0.861766
Cer(d18:1/24:1)	0.758686	0.921253
FA16:0	0.952658	0.364344
FA16:1	0.463479	0.875127
FA18:0	0.762062	0.383824
FA18:1	0.256118	0.491257
FA22:4	0.635986	0.374432
GlcCerd18:1/22:0	0.172781	0.555436
GlcCerd18:1/24:0	0.575415	0.71819
GlcCerd18:1/24:1	0.885244	0.852625
LPE18:0	0.377413	0.358885
LPE18:2	0.453316	0.099997
LPE20:0	0.511492	0.706977
LPE20:1	0.23559	0.235221
PC33:1	0.505912	0.141399
PC34:1	0.53946	0.938657
PC34:3	0.805886	0.540409
PC35:2	0.464949	0.468555
PC38:3	0.726794	0.419922
PCp34:1	0.747767	0.405379
PCp34:2	0.588758	0.773649
PCp34:3	0.349201	0.271764
PCp36:3	0.230115	0.242502
PCp36:4	0.24013	0.44408
PCp38:3	0.129447	0.0665379
PCp38:4	0.745718	0.629462
PE36:4	0.867776	0.579396
PE40:6	0.315747	0.00659567
PI34:1	0.389807	0.523368
PI34:2	0.758223	0.534924
PI36:1	0.0540917	0.110147
PI36:2	0.658516	0.32096
PI36:3	0.408126	0.61755
PI36:4	0.804742	0.379878
PI38:4	0.435483	0.800462
PI38:5	0.0904643	0.819431
PI40:8	0.775976	0.042433
PIp36:5	0.110295	0.582498
plasmenyl-PE36:3	0.605842	0.156378
plasmenyl-PE36:5	0.0320041	0.968212
plasmenyl-PE36:6	0.0478604	0.966531
plasmenyl-PE38:5	0.264534	0.200261
plasmenyl-PE38:6	0.228457	0.746411
plasmenyl-PE38:7	0.106406	0.347785
plasmenyl-PE40:7	0.206286	0.026145
PS38:3	0.964051	0.891751
PS38:4	0.256049	0.550354
PS40:3	0.299956	0.854371
PS40:4	0.516593	0.891269
PS40:6	0.493605	0.178267
PS42:5	0.188585	0.595058
PS42:6	0.463265	0.644986
PS42:8	0.241817	0.357196
PSp34:0	0.438507	0.827826
SM(d18:1/18:0)	0.462733	0.0542971
SM(d18:1/18:1)	0.120302	0.17546
SM(d18:1/20:1)	0.470604	0.282258
SM(d18:2/24:1)	0.942049	0.950121

## Sheet: Supp T4
Supplemental Table T4: ChemRICH enrichment analysis input compound ID's, p-values and foldchange (converted from odds ratio) for GADA-first
Compound.Name	InChiKeys	Pubchem.ID	SMILES	pvalue	foldchange	CID	ClusterNumber	xlogp	ClusterLabel	TreeLabels	FDR
1-monoolein	RZRNAYUHWVFMIP-KTKRTIGZSA-N	5283468	CCCCCCCC/C=C\CCCCCCCC(=O)OCC(CO)O	0.073	1.2	5283468	10	7.132	Unsaturated_Diglycerides	a	1
1-monopalmitin	QHZLMUACJMDIAE-UHFFFAOYSA-N	14900	CCCCCCCCCCCCCCCC(=O)OCC(CO)O	0.14	1.2	14900	13	6.51	Glycerides		1
1-monostearin	VBICKXHEKHSIBG-UHFFFAOYSA-N	24699	CCCCCCCCCCCCCCCCCC(=O)OCC(CO)O	0.72	0.96	24699	13	7.648	Glycerides		1
1,2-dihydroxycylohexane NIST	PFURGBBHAOXLIO-UHFFFAOYSA-N	13601	C1CCC(C(C1)O)O	0.64	0.93	13601	40	0.517	Cyclohexanols		1
1,5-anhydroglucitol	MPCAJMNYNOGXPB-SLPGGIOYSA-N	64960	C1[C@@H]([C@H]([C@@H]([C@H](O1)CO)O)O)O	0.27	0.88	64960	14	-1.591	Hexoses		1
2-deoxytetronic acid	DZAIOXUZHHTJKN-UHFFFAOYSA-N	150929	C(C(CO)O)C(=O)O	0.099	1.3	150929	5	-1.631	Hydroxybutyrates		1
2-deoxytetronic acid NIST	UFYGCFHQAXXBCF-UHFFFAOYSA-N	192742	C(CO)C(C(=O)O)O	0.2	0.79	192742	5	-1.365	Glycols		1
2-hydroxybutanoic acid	AFENDNXGAFYKQO-VKHMYHEASA-N	440864	CC[C@@H](C(=O)O)O	0.31	0.79	440864	22	-0.233	Hydroxybutyrates		1
2-hydroxyglutaric acid	HWXBTNAVRSUOJR-UHFFFAOYSA-N	43	C(CC(=O)O)C(C(=O)O)O	0.0085	1.5	43	49	-1.116	Glutarates		1
2-hydroxyvaleric acid	JRHWHSJDIILJAT-UHFFFAOYSA-N	98009	CCCC(C(=O)O)O	0.17	1.3	98009	22	0.336	Hydroxybutyrates		1
2-ketoisocaproic acid	BKAJNAXTPSGJCU-UHFFFAOYSA-N	70	CC(C)CC(=O)C(=O)O	0.32	0.8	70	37	0.904	Keto Acids		1
2-ketoisovaleric acid	QHKABHOOEWYVLI-UHFFFAOYSA-N	49	CC(C)C(=O)C(=O)O	0.29	0.85	49	37	0.12	Keto Acids		1
2,3-dihydroxybutanoic acid NIST	LOUGYXZSURQALL-UHFFFAOYSA-N	250402	CC(C(C(=O)O)O)O	0.002	0.5	250402	5	-1.263	Sugar Acids		0.65
3-aminoisobutyric acid	QCHPKSFMDHPSNR-UHFFFAOYSA-N	64956	CC(CN)C(=O)O	0.44	0.88	64956	24	-0.733	Amino Acids		1
3-hydroxybutyric acid	WHBMMWSBFZVSSR-GSVOUGTGSA-N	92135	C[C@H](CC(=O)O)O	0.11	0.86	92135	5	-0.499	Hydroxybutyrates		1
5-methoxytryptamine	JTEJPPKMYBDEMY-UHFFFAOYSA-N	1833	COC1=CC2=C(C=C1)NC=C2CCN	0.033	1.3	1833	51	0.687	Serotonin		1
aconitic acid	GTZCVFVGUGFEME-IWQZZHSRSA-N	643757	C(/C(=C/C(=O)O)/C(=O)O)C(=O)O	0.025	1.7	643757	25	-1.034	Dicarboxylic Acids		1
adipic acid	WNLRTRBMVRJNCN-UHFFFAOYSA-N	196	C(CCC(=O)O)CC(=O)O	0.2	1.2	196	4	0.006	Dicarboxylic Acids		1
alanine	QNAYBMKLOCPYGJ-REOHCLBHSA-N	5950	C[C@@H](C(=O)O)N	0.07	2.3	5950	50	-2.824	Amino Acids		1
alpha-ketoglutarate	KPGXRSRHYNQIFN-UHFFFAOYSA-N	51	C(CC(=O)O)C(=O)C(=O)O	0.074	0.76	51	41	-1.056	Glutarates	b	1
aminomalonate	JINBYESILADKFW-UHFFFAOYSA-N	100714	C(C(=O)O)(C(=O)O)N	0.11	0.77	100714	39	-3.523	Dicarboxylic Acids		1
arachidic acid	VKOBVWXKNCXXDE-UHFFFAOYSA-N	10467	CCCCCCCCCCCCCCCCCCCC(=O)O	0.18	0.61	10467	4	9.846	Saturated FA		1
arachidonic acid	YZXBAPSDXZZRGB-DOFZRALJSA-N	444899	CCCCC/C=C\C/C=C\C/C=C\C/C=C\CCCC(=O)O	0.49	1.1	444899	15	8.349	UnSaturated FA		1
ascorbic acid	CIWBSHSKHKDKBQ-JLAZNSOCSA-N	54670067	C([C@@H]([C@@H]1C(=C(C(=O)O1)O)O)O)O	0.53	0.92	54670067	25	-0.178	Sugar Acids		1
asparagine	DCXYFEDJOCDNAF-REOHCLBHSA-N	6267	C([C@@H](C(=O)O)N)C(=O)N	0.089	1.6	6267	53	-4.435	Amino Acids, Basic		1
aspartic acid	CKLJMWTZIZZHCS-REOHCLBHSA-N	5960	C([C@@H](C(=O)O)N)C(=O)O	0.35	1.3	5960	53	-3.707	Amino Acids		1
azelaic acid	BDJRBEYXGGNYIS-UHFFFAOYSA-N	2266	C(CCCC(=O)O)CCCC(=O)O	0.37	1.1	2266	4	1.713	Saturated FA		1
behenic acid	UKMSUNONTOPOIO-UHFFFAOYSA-N	8215	CCCCCCCCCCCCCCCCCCCCCC(=O)O	0.43	1.3	8215	4	10.984	Saturated FA		1
benzoic acid	WPYMKLBDIGXBTP-UHFFFAOYSA-N	243	C1=CC=C(C=C1)C(=O)O	0.58	1.1	243	17	0.982	Benzoates		1
benzylalcohol	IWDCLRJOBJJRNH-UHFFFAOYSA-N	2879	CC1=CC=C(C=C1)O	0.045	0.68	2879	17	1.338	Cresols		1
beta-alanine	UCMIRNVEIXFBKS-UHFFFAOYSA-N	239	C(CN)C(=O)O	0.069	0.68	239	24	-1.026	Amino Acids		1
capric acid	GHVNFZFCNZKVNT-UHFFFAOYSA-N	2969	CCCCCCCCCC(=O)O	0.078	1.4	2969	4	4.156	Saturated FA		1
caprylic acid	WWZKQHOCKIZLMA-UHFFFAOYSA-N	379	CCCCCCCC(=O)O	0.21	0.84	379	4	3.018	Saturated FA		1
cholesterol	HVYWMOMLDIMFJA-DPAQBDIFSA-N	5997	C[C@H](CCCC(C)C)[C@H]1CC[C@@H]2[C@@]1(CC[C@H]3[C@H]2CC=C4[C@@]3(CC[C@@H](C4)O)C)C	0.059	2	5997	9	10.518	Cholestenes		1
citramalic acid	XFTRTWQBIOMVPK-UHFFFAOYSA-N	1081	CC(CC(=O)O)(C(=O)O)O	0.78	1	1081	5	-1.364	Dicarboxylic Acids		1
conduritol-beta-epoxide	ZHMWOVGZCINIHW-SPHYCDKFSA-N	9989541	[C@@H]1([C@@H]([C@H](C2C([C@@H]1O)O2)O)O)O	0.1	1.3	9989541	14	-1.727	Cyclitols		1
creatinine	DDRJAANPRJIHGJ-UHFFFAOYSA-N	588	CN1CC(=O)N=C1N	0.76	1.1	588	56	-0.126	Imidazoles		1
cysteine	XUJNEKJLAYXESH-REOHCLBHSA-N	5862	C([C@@H](C(=O)O)N)S	0.12	0.84	5862	38	-2.575	Amino Acids, Sulfur		1
cystine	LEVWYRKDKASIDU-UHFFFAOYSA-N	595	C(C(C(=O)O)N)SSCC(C(=O)O)N	0.07	0.72	595	38	-3.312	Amino Acids, Sulfur		1
dehydroascorbic acid	SBJKKFFYIZUCET-JLAZNSOCSA-N	440667	C([C@@H]([C@@H]1C(=O)C(=O)C(=O)O1)O)O	0.016	1.4	440667	29	-1.878	Sugar Acids	c	1
deoxypentitol	FJGNTEKSQVNVTJ-UHFFFAOYSA-N	270738	CC(C(C(CO)O)O)O	0.75	1.1	270738	19	-2.092	Sugar Alcohols		1
diglycerol	GPLRAVKSCUXZTP-UHFFFAOYSA-N	42953	C(C(COCC(CO)O)O)O	0.032	1.6	42953	27	-2.742	Sugar Alcohols		1
epsilon-caprolactam	JBKVHLHDHHXQEQ-UHFFFAOYSA-N	7768	C1CCC(=O)NCC1	0.013	0.63	7768	52	0.404	Lactams		1
erythritol	UNXHWFMMPAWVPI-ZXZARUISSA-N	222285	C([C@H]([C@H](CO)O)O)O	0.6	1.1	222285	43	-2.552	Sugar Alcohols		1
erythronic acid lactone	SGMJBNSHAZVGMC-PWNYCUMCSA-N	5325915	C1[C@H]([C@H](C(=O)O1)O)O	0.21	0.77	5325915	5	-0.717	Butyrates		1
ethanolamine	HZAXFHJVJLSVMW-UHFFFAOYSA-N	700	C(CO)N	0.032	1.2	700	42	-1.275	Ethanolamines		1
fructose	RFSUNEUAIZKAJO-ARQDHWQXSA-N	439709	C([C@@H]1[C@H]([C@@H]([C@](O1)(CO)O)O)O)O	0.41	0.94	439709	35	-1.74	Hexoses		1
fucose	SHZGCJCMOBCMKK-FPRJBGLDSA-N	439650	C[C@@H]1[C@@H]([C@@H]([C@H]([C@@H](O1)O)O)O)O	0.12	0.77	439650	14	-0.994	Hexoses		1
fumaric acid	VZCYOOQTPOCHFL-OWOJBTEDSA-N	444972	C(=C/C(=O)O)\C(=O)O	0.22	0.69	444972	25	-0.416	Dicarboxylic Acids		1
galactonic acid	RGHNJXZEOKUKBD-MGCNEYSASA-N	128869	C([C@H]([C@@H]([C@@H]([C@H](C(=O)O)O)O)O)O)O	0.16	1.3	128869	29	-3.739	Sugar Acids	c	1
gamma-aminobutyric acid	BTCSSZJGUNDROE-UHFFFAOYSA-N	119	C(CC(=O)O)CN	0.3	0.87	119	24	-0.668	Butyrates		1
gluconic acid	RGHNJXZEOKUKBD-QTBDOELSSA-N	6857417	C([C@@H]([C@H]([C@@H]([C@@H](C(=O)O)O)O)O)O)O	0.33	1.2	6857417	29	-3.739	Sugar Acids	c	1
glucose	WQZGKKKJIJFFOK-VFUOTHLCSA-N	64689	C([C@@H]1[C@H]([C@@H]([C@H]([C@@H](O1)O)O)O)O)O	0.24	1.3	64689	14	-1.697	Hexoses		1
glutamic acid	WHUUTDBJXJRKMK-VKHMYHEASA-N	33032	C(CC(=O)O)[C@@H](C(=O)O)N	0.16	1.4	33032	23	-3.349	Glutamates		1
glutamine	ZDXPYRJPNDTMRX-VKHMYHEASA-N	5961	C(CC(=O)N)[C@@H](C(=O)O)N	0.21	0.66	5961	23	-4.077	Amino Acids, Basic		1
glutaric acid	JFCQEDHGNNZCLN-UHFFFAOYSA-N	743	C(CC(=O)O)CC(=O)O	0.17	0.75	743	41	-0.352	Glutarates	b	1
glyceric acid	RBNPOMFGQQGHHO-UWTATZPHSA-N	439194	C([C@H](C(=O)O)O)O	0.53	0.87	439194	5	-1.723	Sugar Acids		1
glycerol	PEDCQBHIVMGVHV-UHFFFAOYSA-N	753	C(C(CO)O)O	0.13	1.4	753	27	-1.88	Sugar Alcohols		1
glycerol-3-galactoside	NHJUPBDCSOGIKX-NTXXKDEISA-N	16048618	C([C@@H]1[C@@H]([C@@H]([C@H]([C@@H](O1)OC[C@@H](CO)O)O)O)O)O	0.21	1.3	16048618	30	-2.988	Sugar Alcohols		1
glycerol-alpha-phosphate	AWUCVROLDVIAJX-UHFFFAOYSA-N	754	C(C(COP(=O)(O)O)O)O	0.083	1.4	754	27	-3.109	Glycerophosphates		1
glycine	DHMQDGOQFOQNFH-UHFFFAOYSA-N	750	C(C(=O)O)N	0.21	0.68	750	24	-3.35	Amino Acids		1
glycolic acid	AEMRFAOFKBGASW-UHFFFAOYSA-N	757	C(C(=O)O)O	0.56	0.92	757	22	-1.117	Glycolates		1
heptadecanoic acid	KEMQGTRYUADPNZ-UHFFFAOYSA-N	10465	CCCCCCCCCCCCCCCCC(=O)O	0.13	1.8	10465	4	8.139	Saturated FA		1
hexitol	FBPFZTCFMRRESA-UHFFFAOYSA-N	453	C(C(C(C(C(CO)O)O)O)O)O	0.091	1.3	453	40	-3.896	Sugar Alcohols		1
hippuric acid	QIAFMBKCNZACKA-UHFFFAOYSA-N	464	C1=CC=C(C=C1)C(=O)NCC(=O)O	0.077	0.87	464	26	0.154	Hippurates		1
histidine	HNDVDQJCIGZPNO-YFKPBYRVSA-N	6274	C1=C(NC=N1)C[C@@H](C(=O)O)N	0.053	0.52	6274	28	-3.429	Amino Acids, Cyclic		1
hydroxycarbamate NIST	DRAJWRKLRBNJRQ-UHFFFAOYSA-M	16639161	C(=O)(NO)O	0.1	0.77	16639161	55	-0.878			1
indole-3-acetate	SEOVTRFCIGRIMH-UHFFFAOYSA-N	802	C1=CC=C2C(=C1)C(=CN2)CC(=O)O	0.16	0.76	802	21	0.805	Indoles		1
indole-3-lactate	XGILAAMKEQUXLS-UHFFFAOYSA-N	92904	C1=CC=C2C(=C1)C(=CN2)CC(C(=O)O)O	0.14	0.82	92904	21	0.21	Indoles		1
indoxyl sulfate	BXFFHSIDQOFMLE-UHFFFAOYSA-N	10258	C1=CC=C2C(=C1)C(=CN2)OS(=O)(=O)O	0.27	0.82	10258	51	-0.075	Indoles		1
inosine	UGQMRVRMYYASKQ-KQYNXXCUSA-N	6021	C1=NC2=C(C(=O)N1)N=CN2[C@H]3[C@@H]([C@@H]([C@H](O3)CO)O)O	0.04	1.3	6021	28	-1.947	Purine Nucleosides		1
isoheptadecanoic acid NIST	IIUXHTGBZYEGHI-UHFFFAOYSA-N	164860	CC(C)CCCCCCCCCCCCCC(=O)O	0.32	1.2	164860	4	8.078	Saturated FA		1
isoleucine	AGPKZVBTJJNPAG-WHFBIAKZSA-N	6306	CC[C@H](C)[C@@H](C(=O)O)N	0.24	1.7	6306	34	-1.6	Amino Acids, Branched-Chain		1
isothreonic acid	JPIJQSOTBSSVTP-GBXIJSLDSA-N	151152	C([C@H]([C@@H](C(=O)O)O)O)O	0.061	0.5	151152	5	-2.395	Butyrates		1
itaconic acid	LVHBHZANLOWSRM-UHFFFAOYSA-N	811	C=C(CC(=O)O)C(=O)O	0.35	0.81	811	25	-0.406	Dicarboxylic Acids		1
lactamide	SXQFCVDSOLSHOQ-UHFFFAOYSA-N	94220	CC(C(=O)N)O	0.6	0.92	94220	42	-1.319	Amides		1
lactic acid	JVTAAEKCZFNVCJ-UHFFFAOYSA-N	612	CC(C(=O)O)O	0.061	0.77	612	22	-0.591	Hydroxybutyrates		1
lactose	GUBGYTABKSRVRQ-QKKXKWKRSA-N	440995	C([C@@H]1[C@@H]([C@@H]([C@H]([C@@H](O1)O[C@@H]2[C@H](OC([C@@H]([C@H]2O)O)O)CO)O)O)O)O	0.057	0.73	440995	30	-3.663	Disaccharides		1
lactulose	JCQLYHFGKNRPGE-FCVZTGTOSA-N	11333	C([C@@H]1[C@@H]([C@@H]([C@H]([C@@H](O1)O[C@@H]2[C@H](O[C@@]([C@H]2O)(CO)O)CO)O)O)O)O	0.016	0.8	11333	31	-3.706	Disaccharides		1
lauric acid	POULHZVOKOAJMA-UHFFFAOYSA-N	3893	CCCCCCCCCCCC(=O)O	0.18	1.2	3893	4	5.294	Saturated FA		1
leucine	ROHFNLRQFUQHCH-YFKPBYRVSA-N	6106	CC(C)C[C@@H](C(=O)O)N	0.28	1.5	6106	34	-1.389	Amino Acids, Branched-Chain		1
levoglucosan	TWNIBLMWSKIRAT-VFUOTHLCSA-N	2724705	C1[C@@H]2[C@H]([C@@H]([C@H]([C@H](O1)O2)O)O)O	0.043	1.2	2724705	31	-1.537	Hexoses		1
linoleic acid	OYHQOLUKZRVURQ-HZJYTTRNSA-N	5280450	CCCCC/C=C\C/C=C\CCCCCCCC(=O)O	0.026	0.62	5280450	15	7.865	UnSaturated FA		1
lysine	KDXKERNSBIXSRK-YFKPBYRVSA-N	5962	C(CCN)C[C@@H](C(=O)O)N	0.024	0.46	5962	23	-2.949	Amino Acids, Basic		1
lyxitol	HEBKCHPVOIAQTA-IMJSIDKUSA-N	439255	C([C@@H](C([C@H](CO)O)O)O)O	0.19	1.5	439255	19	-3.224	Sugar Alcohols		1
maleimide	PEEHTFAAVSWFBL-UHFFFAOYSA-N	10935	C1=CC(=O)NC1=O	0.13	1.4	10935	56	-0.676	Maleimides		1
malic acid	BJEPYKJPYRNKOW-UHFFFAOYSA-N	525	C(C(C(=O)O)O)C(=O)O	0.56	0.85	525	5	-1.474	Dicarboxylic Acids		1
maltose	GUBGYTABKSRVRQ-PICCSMPSSA-N	439186	C([C@@H]1[C@H]([C@@H]([C@H]([C@H](O1)O[C@@H]2[C@H](OC([C@@H]([C@H]2O)O)O)CO)O)O)O)O	0.24	0.83	439186	30	-3.663	Disaccharides		1
methanolphosphate	CAAULPUQFIIOTL-UHFFFAOYSA-N	13130	COP(=O)(O)O	0.0083	0.61	13130	54	-1.728	Organophosphates		1
methionine	FFEARJCKVFRZRR-BYPYZUCNSA-N	6137	CSCC[C@@H](C(=O)O)N	0.014	0.62	6137	48	-1.853	Amino Acids, Sulfur		1
methionine sulfoxide	QEFRNWWLZKMPFJ-YGVKFDHGSA-N	158980	CS(=O)CC[C@@H](C(=O)O)N	0.47	0.89	158980	48	-3.882	Amino Acids, Sulfur		1
myo-inositol	CDAISMWEOUEBRE-UHFFFAOYSA-N	892	C1(C(C(C(C(C1O)O)O)O)O)O	0.55	0.83	892	40	-1.458	Sugar Alcohols		1
N-acetylmannosamine	OVRNDRQMDRJTHS-ZTVVOAFPSA-N	439281	CC(=O)N[C@H]1[C@H]([C@@H]([C@H](OC1O)CO)O)O	0.12	0.78	439281	18	-1.488	Hexosamines		1
N-methylalanine	GDFAOVXKHJXLEI-VKHMYHEASA-N	5288725	C[C@@H](C(=O)O)NC	0.11	0.61	5288725	50	-0.268	Amino Acids		1
nornicotine	MYKUKUCHPMASKF-UHFFFAOYSA-N	412	C1CC(NC1)C2=CN=CC=C2	0.38	1.2	412	21	0.035	Pyridines		1
octadecanol	GLDOVTGHNKAZLK-UHFFFAOYSA-N	8221	CCCCCCCCCCCCCCCCCCO	0.052	1.7	8221	47	8.817	Fatty Alcohols		1
octanol NIST	KBPLFHHGFOOTCA-UHFFFAOYSA-N	957	CCCCCCCCO	0.21	0.75	957	47	3.127	Octanols		1
oleamide NIST	FATBGEAMYMYZAF-KTKRTIGZSA-N	5283387	CCCCCCCC/C=C\CCCCCCCC(=O)N	0.18	0.78	5283387	12	7.464	Oleic Acids		1
oleic acid	ZQPPMHVWECSIRJ-KTKRTIGZSA-N	445639	CCCCCCCC/C=C\CCCCCCCC(=O)O	0.0069	0.58	445639	15	8.192	UnSaturated FA		1
ornithine	AHLPHDHHMVZTML-BYPYZUCNSA-N	6262	C(C[C@@H](C(=O)O)N)CN	0.087	0.63	6262	23	-3.307	Amino Acids, Basic		1
oxoproline	ODHCTXKNWHHXJC-VKHMYHEASA-N	7405	C1CC(=O)N[C@@H]1C(=O)O	0.23	1.4	7405	18	-0.827	Amino Acids, Cyclic		1
palmitic acid	IPCSVZSSVZVIGE-UHFFFAOYSA-N	985	CCCCCCCCCCCCCCCC(=O)O	0.023	2.4	985	4	7.57	Saturated FA		1
palmitoleic acid	SECPZKHBENQXJG-FPLPWBNLSA-N	445638	CCCCCC/C=C\CCCCCCCC(=O)O	0.007	0.8	445638	15	7.054	UnSaturated FA		1
pelargonic acid	FBUKVWPVBMHYJY-UHFFFAOYSA-N	8158	CCCCCCCCC(=O)O	0.17	1.4	8158	4	3.587	Saturated FA		1
phenylalanine	COLNVLDHVKWLRT-QMMMGPOBSA-N	6140	C1=CC=C(C=C1)C[C@@H](C(=O)O)N	0.066	2.6	6140	26	-1.575	Amino Acids, Aromatic		1
phenylethylamine	BHHGXPLMPWCGHP-UHFFFAOYSA-N	1001	C1=CC=C(C=C1)CCN	0.052	1.4	1001	26	1.106	Phenethylamines		1
phosphate	NBIIXXVUZAFLBC-UHFFFAOYSA-N	1004	OP(=O)(O)O	0.71	1.1	1004	54	-2.247	Polymers		1
phosphoethanolamine	SUHOOTKUPISOBE-UHFFFAOYSA-N	1015	C(COP(=O)(O)O)N	0.84	1	1015	42	-2.504	Ethanolamines		1
pipecolinic acid	HXEACLLIILLPRG-RXMQYKEDSA-N	736316	C1CCN[C@H](C1)C(=O)O	0.3	0.8	736316	18	0.173	Pipecolic Acids		1
piperidone	XUWHAWMETYGRKB-UHFFFAOYSA-N	12665	C1CCNC(=O)C1	0.25	0.9	12665	52	0.046	Piperidones		1
proline	ONIBWKKTOPOVIA-BYPYZUCNSA-N	145742	C1C[C@H](NC1)C(=O)O	0.069	0.56	145742	18	-0.185	Amino Acids, Cyclic		1
propane-1,3-diol NIST	YPFDHNVEDLHUCE-UHFFFAOYSA-N	10442	C(CO)CO	0.45	0.89	10442	27	-0.85	Glycols		1
pseudo-uridine	PTJWIQPHWPFNBW-GBNDHIKLSA-N	15047	C1=C(C(=O)NC(=O)N1)[C@H]2[C@@H]([C@@H]([C@H](O2)CO)O)O	0.17	0.62	15047	28	-2.477	Uridine		1
pyruvic acid	LCTONWCANYUPML-UHFFFAOYSA-N	1060	CC(=O)C(=O)O	0.22	0.9	1060	37	-0.426	Keto Acids		1
ribitol	HEBKCHPVOIAQTA-ZXFHETKHSA-N	827	C(C(C(C(CO)O)O)O)O	0.071	0.81	827	19	-3.224	Sugar Alcohols		1
ribonic acid	QXKAIJAYHKCRRA-BXXZVTAOSA-N	5460677	C([C@H]([C@H]([C@H](C(=O)O)O)O)O)O	0.093	1.5	5460677	49	-3.067	Glutarates		1
ribose	HMFHBZSHGGEWLO-SOOFDHNKSA-N	5779	C([C@@H]1[C@H]([C@H](C(O1)O)O)O)O	0.6	1.1	5779	35	-1.454	Pentoses		1
salicylaldehyde	SMQUZDBALVYZAC-UHFFFAOYSA-N	6998	C1=CC=C(C(=C1)C=O)O	0.031	0.77	6998	17	0.989	Aldehydes		1
salicylic acid	YGSDEFSMJLZEOE-UHFFFAOYSA-N	338	C1=CC=C(C(=C1)C(=O)O)O	0.44	0.85	338	17	0.908	Salicylates		1
serine	MTCFGRXMJLQNBG-REOHCLBHSA-N	5951	C([C@@H](C(=O)O)N)O	0.44	0.75	5951	39	-3.956	Amino Acids		1
stearic acid	QIQXTHQIDYTFRH-UHFFFAOYSA-N	5281	CCCCCCCCCCCCCCCCCC(=O)O	0.075	2.3	5281	4	8.708	Saturated FA		1
succinic acid	KDYFGRWQOYBRFD-UHFFFAOYSA-N	1110	C(CC(=O)O)C(=O)O	0.21	1.6	1110	41	-0.71	Dicarboxylic Acids	b	1
sucrose	CZMRCDWAGMRECN-UGDNZRGBSA-N	5988	C([C@@H]1[C@H]([C@@H]([C@H]([C@H](O1)O[C@]2([C@H]([C@@H]([C@H](O2)CO)O)O)CO)O)O)O)O	0.5	1.1	5988	31	-3.277	Disaccharides		1
tagatose	LKDRXBCSQODPBY-OEXCPVAWSA-N	439312	C1[C@H]([C@@H]([C@@H](C(O1)(CO)O)O)O)O	0.39	1.1	439312	14	-1.74	Hexoses		1
taurine	XOAAWQZATWQOTB-UHFFFAOYSA-N	1123	C(CS(=O)(=O)O)N	0.43	0.91	1123	38	-1.678	Alkanesulfonic Acids		1
threitol	UNXHWFMMPAWVPI-QWWZWVQMSA-N	169019	C([C@H]([C@@H](CO)O)O)O	0.5	0.91	169019	43	-2.552	Sugar Alcohols		1
threonic acid	JPIJQSOTBSSVTP-STHAYSLISA-N	5460407	C([C@@H]([C@H](C(=O)O)O)O)O	0.23	1.4	5460407	5	-2.395	Butyrates		1
threonine	AYFVYJQAPQTCCC-GBXIJSLDSA-N	6288	C[C@H]([C@@H](C(=O)O)N)O	0.061	1.9	6288	39	-3.496	Amino Acids		1
tocopherol alpha-	NCYCYZXNIZJOKI-OVSJKPMPSA-N	638015	CC1=C(C(CCC1)(C)C)/C=C/C(=C/C=C/C(=C/C=O)/C)/C	0.15	1.6	638015	9	6.335	Retinoids		1
tocopherol gamma-	QUEDXNHFTDJVIY-DQCZWYHMSA-N	92729	CC1=C(C=C2CC[C@@](OC2=C1C)(C)CCC[C@H](C)CCC[C@H](C)CCCC(C)C)O	0.36	1.2	92729	17	10.514	Tocopherols		1
trans-4-hydroxyproline	PMMYEEVYMWASQN-DMTCNVIQSA-N	5810	C1[C@H](CN[C@@H]1C(=O)O)O	0.22	0.65	5810	18	-0.786	Amino Acids, Cyclic		1
tryptophan	QIVBCDIJIAJPQS-VIFPVBQESA-N	6305	C1=CC=C2C(=C1)C(=CN2)C[C@@H](C(=O)O)N	0.35	0.69	6305	21	-2.023	Amino Acids, Aromatic		1
tyrosine	OUYCCCASQSFEME-QMMMGPOBSA-N	6057	C1=CC(=CC=C1C[C@@H](C(=O)O)N)O	0.35	1.4	6057	26	-2.711	Amino Acids, Aromatic		1
uracil	ISAKRJDGNUQOIC-UHFFFAOYSA-N	1174	C1=CNC(=O)NC1=O	0.35	1.2	1174	36	-0.875	Pyrimidinones		1
urea	XSQUKJJJFZCRTK-UHFFFAOYSA-N	1176	C(=O)(N)N	0.03	0.72	1176	55	-1.686	Organic Chemicals		1
uric acid	LEHOTFFKMJEONL-UHFFFAOYSA-N	1175	C12=C(NC(=O)N1)NC(=O)NC2=O	0.28	0.84	1175	36	-1.191	Xanthines		1
uridine	DRTQHJPVMGBUCF-XVFCMESISA-N	6029	C1=CN(C(=O)NC1=O)[C@H]2[C@@H]([C@@H]([C@H](O2)CO)O)O	0.042	1.6	6029	28	-2.117	Pyrimidine Nucleosides		1
valine	KZSNJWFQEVHDMF-BYPYZUCNSA-N	6287	CC(C)[C@@H](C(=O)O)N	0.17	0.52	6287	34	-2.169	Amino Acids, Branched-Chain		1
xanthine	LRFVTYWOQMYALW-UHFFFAOYSA-N	1188	C1=NC2=C(N1)C(=O)NC(=O)N2	0.27	0.75	1188	36	-0.654	Xanthines		1
xylitol	HEBKCHPVOIAQTA-NGQZWQHPSA-N	6912	C([C@H](C([C@H](CO)O)O)O)O	0.025	0.59	6912	19	-3.224	Sugar Alcohols		1
xylose	SRBFZHDQGSBBOR-IOVATXLUSA-N	135191	C1[C@H]([C@@H]([C@H](C(O1)O)O)O)O	0.27	1.3	135191	14	-1.454	Pentoses		1
xylulose NIST	LQXVFWRQNMEDEE-PYHARJCCSA-N	439205	C1[C@@H]([C@H](C(O1)(CO)O)O)O	0.32	1.2	439205	35	-1.497	Pentoses		1
CE18:1	RJECHNNFRHZQKU-RMUVNZEASA-N	5283632	CCCCCCCC/C=C\CCCCCCCC(=O)O[C@H]1CC[C@@]2([C@H]3CC[C@]4([C@H]([C@@H]3CC=C2C1)CC[C@@H]4[C@H](C)CCCC(C)C)C)C	0.015	2.7	5283632	9	19.53	Cholesterol Esters		1
CE18:2	NAACPBBQTFFYQB-LJAITQKLSA-N	5287939	CCCCC/C=C\C/C=C\CCCCCCCC(=O)O[C@H]1CC[C@@]2([C@H]3CC[C@]4([C@H]([C@@H]3CC=C2C1)CC[C@@H]4[C@H](C)CCCC(C)C)C)C	0.11	2	5287939	9	19.203	Cholesterol Esters		1
CE18:3	FYMCIBHUFSIWCE-WVXFKAQASA-N	6436907	CC/C=C\C/C=C\C/C=C\CCCCCCCC(=O)O[C@H]1CC[C@@]2([C@H]3CC[C@]4([C@H]([C@@H]3CC=C2C1)CC[C@@H]4[C@H](C)CCCC(C)C)C)C	0.12	1.7	6436907	9	18.876	Cholesterol Esters		1
CE20:4	IMXSFYNMSOULQS-BEDFLICRSA-N	6479222	CCCCC/C=C\C/C=C\C/C=C\C/C=C\CCCC(=O)O[C@H]1CC[C@@]2([C@H]3CC[C@]4([C@H]([C@@H]3CC=C2C1)CC[C@@H]4[C@H](C)CCCC(C)C)C)C	0.16	1.5	6479222	9	19.687	Cholesterol Esters		1
CE22:6	VOEVEGPMRIYYKC-HNJOWPRISA-N	14274978	CC/C=C\C/C=C\C/C=C\C/C=C\C/C=C\C/C=C\CCC(=O)O[C@H]1CC[C@@]2([C@H]3CC[C@]4([C@H]([C@@H]3CC=C2C1)CC[C@@H]4[C@H](C)CCCC(C)C)C)C	0.22	1.4	14274978	9	20.171	Cholesterol Esters		1
Cer(d18:1/16:0)	YDNKGFDKKRUKPY-TURZORIXSA-N	5283564	CCCCCCCCCCCCCCCC(=O)N[C@@H](CO)[C@@H](/C=C/CCCCCCCCCCCCC)O	0.51	0.75	5283564	12	13.944	Ceramides		1
Cer(d18:1/22:0)	KEPQASGDXIEOIL-GLQCRSEXSA-N	5283567	CCCCCCCCCCCCCCCCCCCCCC(=O)N[C@@H](CO)[C@@H](/C=C/CCCCCCCCCCCCC)O	0.3	0.67	5283567	12	17.358	Ceramides		1
Cer(d18:1/24:1)	VJSBNBBOSZJDKB-KPEYJIHVSA-N	5283568	CCCCCCCCCCCCC/C=C/[C@H]([C@H](CO)NC(=O)CCCCCCCCCCCCC/C=C\CCCCCCCC)O	0.037	0.44	5283568	12	17.98	Ceramides		1
Ceramided18:1/23:0	NAJHAHQNQCNWOP-PUYNVXOJSA-N	52931115	CCCCCCCCCCCCCCCCCCCCCCC(=O)N[C@@H](CO)[C@@H](/C=C/CCCCCCCCCCCCC)O	0.41	0.82	52931115	12	17.927	Ceramides		1
Ceramided42:1	ZJVVOYPTFQEGPH-AUTSUKAISA-N	5283571	CCCCCCCCCCCCCCCCCCCCCCCC(=O)N[C@@H](CO)[C@@H](/C=C/CCCCCCCCCCCCC)O	0.27	0.68	5283571	12	18.496	Ceramides		1
DG32:0	JEJLGIQLPYYGEE-XIFFEERXSA-N	644078	CCCCCCCCCCCCCCCC(=O)OC[C@H](CO)OC(=O)CCCCCCCCCCCCCCC	0.52	0.89	644078	13	14.9	Saturated_Diglycerides		1
DG34:0	VYQDALBEQRZDPL-DHUJRADRSA-N	3246945	CCCCCCCCCCCCCCCCCC(=O)OC[C@H](CO)OC(=O)CCCCCCCCCCCCCCC	0.18	0.7	3246945	13	16.038	Saturated_Diglycerides		1
DG34:1	YEJYLHKQOBOSCP-OZKTZCCCSA-N	5282283	CCCCCCCCCCCCCCCC(=O)OC[C@H](CO)OC(=O)CCCCCCC/C=C\CCCCCCCC	0.29	0.83	5282283	10	15.522	Unsaturated_Diglycerides	a	1
DG36:0	UHUSDOQQWJGJQS-UHFFFAOYSA-N	102615	CCCCCCCCCCCCCCCCCC(=O)OCC(CO)OC(=O)CCCCCCCCCCCCCCCCC	0.12	0.55	102615	13	17.176	Saturated_Diglycerides		1
DG36:2	AFSHUZFNMVJNKX-LLWMBOQKSA-N	9543716	CCCCCCCC/C=C\CCCCCCCC(=O)OC[C@H](CO)OC(=O)CCCCCCC/C=C\CCCCCCCC	0.3	0.78	9543716	10	16.144	Unsaturated_Diglycerides	a	1
DG36:3	BLZVZPYMHLXLHG-JOBMVARSSA-N	9543722	CCCCCCCC/C=C\CCCCCCCC(=O)OC[C@H](CO)OC(=O)CCCCCCC/C=C\C/C=C\CCCCC	0.38	0.84	9543722	10	15.817	Unsaturated_Diglycerides	a	1
DG38:5	GRGDLDNREYVILP-CNWVQWJYSA-N	9543784	CCCCC/C=C\C/C=C\CCCCCCCCCC(=O)O[C@@H](CO)COC(=O)CCCCCCC/C=C\C/C=C\C/C=C\CC	0.036	0.57	9543784	10	16.301	Unsaturated_Diglycerides	a	1
DG38:6	YDVDXUYJFQLPEG-CTHJWPIASA-N	9543795	CCCCC/C=C\C/C=C\C/C=C\CCCCCCC(=O)O[C@@H](CO)COC(=O)CCCCCCC/C=C\C/C=C\C/C=C\CC	0.045	0.69	9543795	10	15.974	Unsaturated_Diglycerides	a	1
DG40:1	VFUWCRMMTRWZAT-JLDYGAOKSA-N	9543793	CCCCCCCCCCCCCCCCCCCC(=O)OC[C@H](CO)OC(=O)CCCCCCCCC/C=C\CCCCCCCC	0.27	1.7	9543793	10	18.936	Unsaturated_Diglycerides	a	1
FA22:4	TWSWSIQAPQLDBP-DOFZRALJSA-N	5497181	CCCCC/C=C\C/C=C\C/C=C\C/C=C\CCCCCC(=O)O	0.77	0.92	5497181	15	9.487	UnSaturated FA		1
GlcCerd18:1/22:0	YIGARKIIFOHVPF-YAEABVQUSA-N	6321359	CCCCCCCCCCCCCCCCCCCCCC(=O)N[C@@H](CO[C@H]1C(C([C@@H]([C@H](O1)CO)O)O)O)[C@@H](/C=C/CCCCCCCCCCCCC)O	0.016	0.41	6321359	32	16.25	Galactosylceramides		1
GlcCerd18:1/24:0	POQRWMRXUOPCLD-AAAFHMTMSA-N	6321361	CCCCCCCCCCCCCCCCCCCCCCCC(=O)N[C@@H](CO[C@H]1C(C([C@@H]([C@H](O1)CO)O)O)O)[C@@H](/C=C/CCCCCCCCCCCCC)O	0.071	0.52	6321361	32	17.388	Galactosylceramides		1
GlcCerd18:1/24:1	WBOZIXHPUPAOIA-RBELZSLISA-N	6321360	CCCCCCCCCCCCC/C=C/[C@H]([C@H](CO[C@H]1C(C([C@@H]([C@H](O1)CO)O)O)O)NC(=O)CCCCCCCCCCCCC/C=C\CCCCCCCC)O	0.17	0.65	6321360	32	16.872	Galactosylceramides		1
LPC18:0	IHNKQIMGVNPMTC-RUZDIDTESA-N	497299	CCCCCCCCCCCCCCCCCC(=O)OC[C@H](COP(=O)([O-])OCC[N+](C)(C)C)O	0.64	1.1	497299	44	6.6	Lysophosphatidylcholines		1
LPC18:1	YAMUFBLWGFFICM-PTGWMXDISA-N	16081932	CCCCCCCC/C=C\CCCCCCCC(=O)OC[C@H](COP(=O)([O-])OCC[N+](C)(C)C)O	0.48	0.79	16081932	20	6.084	Lysophosphatidylcholines		1
LPC18:2	SPJFYYJXNPEZDW-FTJOPAKQSA-N	11005824	CCCCC/C=C\C/C=C\CCCCCCCC(=O)OC[C@H](COP(=O)([O-])OCC[N+](C)(C)C)O	0.14	0.63	11005824	20	5.757	Lysophosphatidylcholines		1
LPC20:0	UATOAILWGVYRQS-HHHXNRCGSA-N	24779473	CCCCCCCCCCCCCCCCCCCC(=O)OC[C@H](COP(=O)([O-])OCC[N+](C)(C)C)O	0.26	1.4	24779473	44	7.738	Lysophosphatidylcholines		1
LPC20:1	GJTDRNFWIDPARY-GTPZACKGSA-N	24779475	CCCCCCCCCC/C=C\CCCCCCCC(=O)OC[C@H](COP(=O)([O-])OCC[N+](C)(C)C)O	0.37	1.3	24779475	20	7.222	Lysophosphatidylcholines		1
LPC20:2	YYQVCMMXPIJVHY-ZOIJLGJPSA-N	52924053	CCCCC/C=C\C/C=C\CCCCCCCCCC(=O)OC[C@H](COP(=O)([O-])OCC[N+](C)(C)C)O	0.34	1.4	52924053	20	6.895	Lysophosphatidylcholines		1
LPE18:0	BBYWOYAFBUOUFP-JOCHJYFZSA-N	46891690	CCCCCCCCCCCCCCCCCC(=O)OC[C@H](COP(=O)([O-])OCC[NH3+])O	0.41	1.2	46891690	45	6.696	Lysophospholipids		1
LPE18:2	DBHKHNGBVGWQJE-USWSLJGRSA-N	52925130	CCCCC/C=C\C/C=C\CCCCCCCC(=O)OC[C@H](COP(=O)(O)OCCN)O	0.33	0.8	52925130	46	5.319	Phosphatidylethanolamines		1
LPE20:0	HEQMDGOBDIGJOC-XMMPIXPASA-N	52925131	CCCCCCCCCCCCCCCCCCCC(=O)OC[C@H](COP(=O)(O)OCCN)O	0.2	4.5	52925131	45	7.3	Lysophospholipids		1
LPE20:1	JEAGLCKGAKACCE-OPSAWKISSA-N	52925139	CCCCCCCC/C=C\CCCCCCCCCC(=O)OC[C@H](COP(=O)(O)OCCN)O	0.066	0.55	52925139	46	6.784	Phosphatidylethanolamines		1
PC16:0/16:0	KILNVBDSWZSGLL-KXQOOQHDSA-N	452110	CCCCCCCCCCCCCCCC(=O)OC[C@H](COP(=O)([O-])OCC[N+](C)(C)C)OC(=O)CCCCCCCCCCCCCCC	0.083	2.1	452110	16	13.852	Saturated_Phosphatidylcholines		1
PC18:1/16:0	WTJKGGKOPKCXLL-VYOBOKEXSA-N	5497103	CCCCCCCCCCCCCCCC(=O)OC[C@H](COP(=O)([O-])OCC[N+](C)(C)C)OC(=O)CCCCCCC/C=C\CCCCCCCC	0.34	0.5	5497103	2	14.474	Unsaturated_Phosphatidylcholines		1
PC28:0	CITHEXJVPOWHKC-UUWRZZSWSA-N	5459377	CCCCCCCCCCCCCC(=O)OC[C@H](COP(=O)([O-])OCC[N+](C)(C)C)OC(=O)CCCCCCCCCCCCC	0.047	1.4	5459377	16	11.576	Saturated_Phosphatidylcholines		1
PC30:0	RFVFQQWKPSOBED-PSXMRANNSA-N	129657	CCCCCCCCCCCCCCCC(=O)O[C@H](COC(=O)CCCCCCCCCCCCC)COP(=O)([O-])OCC[N+](C)(C)C	0.17	1.4	129657	16	12.714	Saturated_Phosphatidylcholines		1
PC32:1	QIBZFHLFHCIUOT-NPBIGWJUSA-N	6443788	CCCCCCCCCCCCCCCC(=O)OC[C@H](COP(=O)([O-])OCC[N+](C)(C)C)OC(=O)CCCCCCC/C=C\CCCCCC	0.81	1.1	6443788	2	13.336	Unsaturated_Phosphatidylcholines		1
PC32:2	GPWHCUUIQMGELX-VHQDNGOZSA-N	24778764	CCCCCC/C=C\CCCCCCCC(=O)OC[C@H](COP(=O)([O-])OCC[N+](C)(C)C)OC(=O)CCCCCCC/C=C\CCCCCC	0.55	1.1	24778764	2	12.82	Unsaturated_Phosphatidylcholines		1
PC32:3	UXEFXNOSLOCOLX-ZCHSEWAGSA-N	52922763	CCCCCCCCCCCCCC(=O)O[C@H](COC(=O)CCCC/C=C\C/C=C\C/C=C\CCCCC)COP(=O)([O-])OCC[N+](C)(C)C	0.091	1.6	52922763	2	12.682	Unsaturated_Phosphatidylcholines		1
PC33:1	GXTATYLPYLLNLV-MGIDVFSBSA-N	24778662	CCCCCCCCCCCCCCC(=O)OC[C@H](COP(=O)([O-])OCC[N+](C)(C)C)OC(=O)CCCCCCCCC/C=C\CCCCCC	0.0095	0.52	24778662	2	13.905	Unsaturated_Phosphatidylcholines		1
PC34:0	PZNPLUBHRSSFHT-RRHRGVEJSA-N	24778686	CCCCCCCCCCCCCCCCCC(=O)O[C@H](COC(=O)CCCCCCCCCCCCCCC)COP(=O)([O-])OCC[N+](C)(C)C	0.087	1.5	24778686	16	14.99	Saturated_Phosphatidylcholines		1
PC34:2	JLPULHDHAOZNQI-ZTIMHPMXSA-N	5287971	CCCCCCCCCCCCCCCC(=O)OC[C@H](COP(=O)([O-])OCC[N+](C)(C)C)OC(=O)CCCCCCC/C=C\C/C=C\CCCCC	0.48	2.3	5287971	2	14.147	Unsaturated_Phosphatidylcholines		1
PC34:3	CNNSEHUKQJCGTE-UPPWDXJYSA-N	24778699	CCCCCCCCCCCCCCCC(=O)OC[C@H](COP(=O)([O-])OCC[N+](C)(C)C)OC(=O)CCCC/C=C\C/C=C\C/C=C\CCCCC	0.27	0.67	24778699	2	13.82	Unsaturated_Phosphatidylcholines		1
PC35:2	ZSKWZJYUVZYDQU-WESJWMGVSA-N	52922491	CCCCCCCCCCCCCCCCC(=O)OC[C@H](COP(=O)([O-])OCC[N+](C)(C)C)OC(=O)CCCCCCC/C=C\C/C=C\CCCCC	0.016	0.37	52922491	2	14.716	Unsaturated_Phosphatidylcholines		1
PC36:0	NRJAVPSFFCBXDT-HUESYALOSA-N	94190	CCCCCCCCCCCCCCCCCC(=O)OC[C@H](COP(=O)([O-])OCC[N+](C)(C)C)OC(=O)CCCCCCCCCCCCCCCCC	0.38	1.3	94190	16	16.128	Saturated_Phosphatidylcholines		1
PC36:1	ATHVAWFAEPLPPQ-VRDBWYNSSA-N	24778825	CCCCCCCCCCCCCCCCCC(=O)OC[C@H](COP(=O)([O-])OCC[N+](C)(C)C)OC(=O)CCCCCCC/C=C\CCCCCCCC	0.22	1.6	24778825	2	15.612	Unsaturated_Phosphatidylcholines		1
PC36:2	SNKAWJBJQDLSFF-NVKMUCNASA-N	10350317	CCCCCCCC/C=C\CCCCCCCC(=O)OC[C@H](COP(=O)([O-])OCC[N+](C)(C)C)OC(=O)CCCCCCC/C=C\CCCCCCCC	0.17	0.25	10350317	2	15.096	Unsaturated_Phosphatidylcholines		1
PC36:3	BXRLDROZWDUSGM-ZRYFCQOPSA-N	24778937	CCCCCCCC/C=C\CCCCCCCC(=O)OC[C@H](COP(=O)([O-])OCC[N+](C)(C)C)OC(=O)CCCC/C=C\C/C=C\CCCCCCCC	0.032	0.36	24778937	2	14.769	Unsaturated_Phosphatidylcholines		1
PC36:4	IIZPXYDJLKNOIY-JXPKJXOSSA-N	10747814	CCCCCCCCCCCCCCCC(=O)OC[C@H](COP(=O)([O-])OCC[N+](C)(C)C)OC(=O)CCC/C=C\C/C=C\C/C=C\C/C=C\CCCCC	0.23	0.57	10747814	2	14.631	Unsaturated_Phosphatidylcholines		1
PC36:5	DYDDZDMJSQYFGN-OIVUZXIWSA-N	24778771	CCCCCC/C=C\CCCCCCCC(=O)OC[C@H](COP(=O)([O-])OCC[N+](C)(C)C)OC(=O)CCC/C=C\C/C=C\C/C=C\C/C=C\CCCCC	0.29	14	24778771	2	14.115	Unsaturated_Phosphatidylcholines		1
PC36:6	SPWBDEZMKCRQSX-NGPPOSSDSA-N	52922847	CCCCC/C=C\C/C=C\C/C=C\CCCCC(=O)O[C@H](COC(=O)CCCCCCC/C=C\C/C=C\C/C=C\CC)COP(=O)([O-])OCC[N+](C)(C)C	0.079	1.4	52922847	2	13.788	Unsaturated_Phosphatidylcholines		1
PC37:2	MCZUABDVGPPWPM-HJTCUGKVSA-N	52922735	CCCCCCCCCCCCCCCCCCC(=O)O[C@H](COC(=O)CCCCCCC/C=C\C/C=C\CCCCC)COP(=O)([O-])OCC[N+](C)(C)C	0.22	0.61	52922735	2	15.854	Unsaturated_Phosphatidylcholines		1
PC37:3	OOYQEEUUQRMQKL-JUUDQZDJSA-N	52922851	CCCCCCCCCCCCCCCCCCC(=O)O[C@H](COC(=O)CCCCCCC/C=C\C/C=C\C/C=C\CC)COP(=O)([O-])OCC[N+](C)(C)C	0.4	0.74	52922851	2	15.527	Unsaturated_Phosphatidylcholines		1
PC37:4	QRPUCJXFPYFTMB-FBFLODOBSA-N	52922853	CCCCCCCCC/C=C\CCCCCCCC(=O)O[C@H](COC(=O)CCCCCCC/C=C\C/C=C\C/C=C\CC)COP(=O)([O-])OCC[N+](C)(C)C	0.16	0.71	52922853	2	15.011	Unsaturated_Phosphatidylcholines		1
PC38:2	KXXLFCAPKGRXBT-FMJYHZMHSA-N	24779263	CCCCCCCCCCCCCCCCCCCC(=O)OC[C@H](COP(=O)([O-])OCC[N+](C)(C)C)OC(=O)CCCCCCC/C=C\C/C=C\CCCCC	0.039	2	24779263	2	16.423	Unsaturated_Phosphatidylcholines		1
PC38:3	OJHJKEBRZSDTTL-VHWCKNCUSA-N	52922741	CCCCCCCC/C=C\CCCCCCCCCC(=O)O[C@H](COC(=O)CCCCCCC/C=C\C/C=C\CCCCC)COP(=O)([O-])OCC[N+](C)(C)C	0.45	1.1	52922741	2	15.907	Unsaturated_Phosphatidylcholines		1
PC38:4	DNYKSJQVBCVGOF-LCKGXUDJSA-N	52923291	CCCCCCCCCCCCCCCCCC(=O)O[C@H](COC(=O)CCC/C=C\C/C=C\C/C=C\C/C=C\CCCCC)COP(=O)([O-])OCC[N+](C)(C)C	0.31	0.67	52923291	2	15.769	Unsaturated_Phosphatidylcholines		1
PC38:5	YLWBKBDNHWQEFU-YJXJLLHLSA-N	53479033	CCCCCC/C=C\CCCCCCCCCC(=O)O[C@H](COC(=O)CCC/C=C\C/C=C\C/C=C\C/C=C\CCCCC)COP(=O)([O-])OCC[N+](C)(C)C	0.54	0.82	53479033	2	15.253	Unsaturated_Phosphatidylcholines		1
PC38:6	PLZBTDKJYHXIEW-DZUXOTHRSA-N	52923295	CCCCC/C=C\C/C=C\CCCCCCCC(=O)O[C@H](COC(=O)CCC/C=C\C/C=C\C/C=C\C/C=C\CCCCC)COP(=O)([O-])OCC[N+](C)(C)C	0.054	1.3	52923295	2	14.926	Unsaturated_Phosphatidylcholines		1
PC38:8	QQNHCRBGLPDWEW-LRFGEVPTSA-N	52922865	CC/C=C\C/C=C\C/C=C\CCCCCCCC(=O)OC[C@H](COP(=O)([O-])OCC[N+](C)(C)C)OC(=O)CCC/C=C\C/C=C\C/C=C\C/C=C\C/C=C\CC	0.33	1.2	52922865	2	14.272	Unsaturated_Phosphatidylcholines		1
PC40:2	AEUCYCQYAUFAKH-DITNKEBASA-N	24779063	CCCCCCCC/C=C\CCCCCCCCCC(=O)OC[C@H](COP(=O)([O-])OCC[N+](C)(C)C)OC(=O)CCCCCCCCC/C=C\CCCCCCCC	0.2	0.69	24779063	2	17.372	Unsaturated_Phosphatidylcholines		1
PC40:5	LJFKFKIYUJNFPZ-ZLFSCUDPSA-N	52923133	CCCCCCCC/C=C\CCCCCCCCCC(=O)OC[C@H](COP(=O)([O-])OCC[N+](C)(C)C)OC(=O)CCC/C=C\C/C=C\C/C=C\C/C=C\CCCCC	0.056	1.6	52923133	2	16.391	Unsaturated_Phosphatidylcholines		1
PC40:6	TYRTWVKQVGNGSZ-RGBTVBCDSA-N	52923195	CCCCC/C=C\C/C=C\CCCCCCCCCC(=O)OC[C@H](COP(=O)([O-])OCC[N+](C)(C)C)OC(=O)CCC/C=C\C/C=C\C/C=C\C/C=C\CCCCC	0.3	1.3	52923195	2	16.064	Unsaturated_Phosphatidylcholines		1
PC40:7	BPUROMFCPFGBOT-ZEGPSQTJSA-N	24778982	CCCCC/C=C\C/C=C\CCCCCCCC(=O)OC[C@H](COP(=O)([O-])OCC[N+](C)(C)C)OC(=O)CC/C=C\C/C=C\C/C=C\C/C=C\C/C=C\CCCCC	0.17	1.4	24778982	2	15.737	Unsaturated_Phosphatidylcholines		1
PC42:1	PAHPUCKPYBHMBM-RURDTVAGSA-N	24778881	CCCCCCCCCCCCCCCCCC(=O)OC[C@H](COP(=O)([O-])OCC[N+](C)(C)C)OC(=O)CCCCCCCCCCCCC/C=C\CCCCCCCC	0.45	0.76	24778881	2	19.026	Unsaturated_Phosphatidylcholines		1
PC42:4	SGYNBRXEOXADHS-CIUHTZMDSA-N	24779052	CCCCCCCCCCCCCCCCCCCC(=O)OC[C@H](COP(=O)([O-])OCC[N+](C)(C)C)OC(=O)CCCCC/C=C\C/C=C\C/C=C\C/C=C\C/C=C\CC	0.45	1.3	24779052	2	17.718	Unsaturated_Phosphatidylcholines		1
PC42:6	DSVRMAGYENFTLY-GDDYDVMSSA-N	52923651	CCCCC/C=C\C/C=C\CCCCCCCCCC(=O)O[C@H](COC(=O)CCCCC/C=C\C/C=C\C/C=C\C/C=C\CCCCC)COP(=O)([O-])OCC[N+](C)(C)C	0.3	0.76	52923651	2	17.202	Unsaturated_Phosphatidylcholines		1
PC44:3	GZZUNXHFXFGEBB-MXZPZXETSA-N	52923541	CCCCCCCCCC/C=C\CCCCCCCCCC(=O)OC[C@H](COP(=O)([O-])OCC[N+](C)(C)C)OC(=O)CCCCCCCCCCC/C=C\C/C=C\CCCCC	0.55	0.81	52923541	2	19.321	Unsaturated_Phosphatidylcholines		1
PC44:4	UIAAGLPOUUFIRG-ZUEQPGPOSA-N	52923481	CCCCCCCCCCCCCCCCCCCCCC(=O)OC[C@H](COP(=O)([O-])OCC[N+](C)(C)C)OC(=O)CCCCC/C=C\C/C=C\C/C=C\C/C=C\CCCCC	0.54	1.2	52923481	2	19.183	Unsaturated_Phosphatidylcholines		1
PCp34:1	OIICTMOQBYZCDA-IIKIFWEUSA-N	11125520	CCCCCCCCCCCCCCCC/C=C\OC[C@H](COP(=O)([O-])OCC[N+](C)(C)C)OC(=O)CCCCCCCCCCCCCCC	0.57	0.77	11125520	2	15.528	Plasmalogens		1
PCp34:2	KMNVIRCHUMQGHD-RCINKDPXSA-N	52923934	CCCCCCCCCCCCCCCC/C=C\OC[C@H](COP(=O)([O-])OCC[N+](C)(C)C)OC(=O)CCCCCCC/C=C\CCCCCC	0.12	0.55	52923934	2	15.012	Unsaturated_Phosphatidylcholines		1
PCp34:3	QLEHHUPUHJPURI-PWYDUFMYSA-N	24779386	CCCCCCCCCCCCCC/C=C\OC[C@H](COP(=O)([O-])OCC[N+](C)(C)C)OC(=O)CCCCCCC/C=C\C/C=C\CCCCC	0.062	0.46	24779386	2	14.685	Unsaturated_Phosphatidylcholines		1
PCp36:3	SOUZQPFUXRVDGK-KCTKZSJBSA-N	53481701	CCCCCCCCCCCCCCCCOC[C@H](COP(=O)([O-])OCC[N+](C)(C)C)OC(=O)CCCCCC/C=C\C/C=C\C/C=C\C/C=C\CC	0.15	0.54	53481701	2	14.938	Unsaturated_Phosphatidylcholines		1
PCp36:4	IOYKZPNDXIIXLN-LOQSCQKMSA-N	24779388	CCCCCCCCCCCCCC/C=C\OC[C@H](COP(=O)([O-])OCC[N+](C)(C)C)OC(=O)CCC/C=C\C/C=C\C/C=C\C/C=C\CCCCC	0.043	0.49	24779388	2	15.169	Unsaturated_Phosphatidylcholines		1
PE34:2	HBZNVZIRJWODIB-NHCUFCNUSA-N	46891780	CCCCCCCCCCCCCCCC(=O)OC[C@H](COP(=O)([O-])OCC[NH3+])OC(=O)CCCCCCC/C=C\C/C=C\CCCCC	0.32	0.8	46891780	7	14.243	Phosphatidylethanolamines		1
PE36:2	DXXUYBAISOHOLM-XRIXOMQFSA-N	52924894	CCCCCCCCCCCCCCCCCC(=O)O[C@H](COC(=O)CCCCCCC/C=C\C/C=C\CCCCC)COP(=O)(O)OCCN	0.36	0.75	52924894	7	14.847	Phosphatidylethanolamines		1
PE36:3	GKAFCSRKMWFPSJ-RJXNKANHSA-N	71728379	CCCCCCCC/C=C\CCCCCCCC(=O)OC[C@H](COP(=O)([O-])OCC[NH3+])OC(=O)CCCCCCC/C=C\C/C=C\CCCCC	0.26	2.4	71728379	7	14.865	Phosphatidylethanolamines		1
PE36:4	DUQDVNACTOXOJA-KTKXOIIHSA-N	52924875	CCCCCCCCCCCCCCCC(=O)O[C@H](COC(=O)CCC/C=C\C/C=C\C/C=C\C/C=C\CCCCC)COP(=O)(O)OCCN	0.32	1.4	52924875	7	14.193	Phosphatidylethanolamines		1
PE38:2	CLPMAPXZURYSNH-CNBLIUODSA-N	9546825	CCCCCCCCCCCCCCCCCCCC(=O)OC[C@H](COP(=O)(O)OCCN)OC(=O)CCCCCCC/C=C\C/C=C\CCCCC	0.039	0.49	9546825	7	15.985	Phosphatidylethanolamines		1
PE38:4	ANRKEHNWXKCXDB-BHFWLYLHSA-N	46891781	CCCCCCCCCCCCCCCCCC(=O)OC[C@H](COP(=O)([O-])OCC[NH3+])OC(=O)CCC/C=C\C/C=C\C/C=C\C/C=C\CCCCC	0.69	1.1	46891781	7	15.865	Phosphatidylethanolamines		1
PE38:6	LFGBKOUQHCWBQI-BZGLIJSBSA-N	52924893	CCCCC/C=C\C/C=C\CCCCCCCC(=O)OC[C@H](COP(=O)(O)OCCN)OC(=O)CCC/C=C\C/C=C\C/C=C\C/C=C\CCCCC	0.38	1.3	52924893	7	14.488	Phosphatidylethanolamines		1
PE40:6	FEABWDMFZNBFCT-KUVQHVNNSA-N	52924379	CCCCC/C=C\C/C=C\CCCCCCCC(=O)OC[C@H](COP(=O)(O)OCCN)OC(=O)CCCCC/C=C\C/C=C\C/C=C\C/C=C\CCCCC	0.14	1.5	52924379	7	15.626	Phosphatidylethanolamines		1
Phosphatidylglycerol29:0	RYHJACYQTJIGMZ-JHOUSYSJSA-N	52926457	CCCCCCCCCCCCCCCC(=O)OC[C@H](COP(=O)(O)OC[C@H](CO)O)OC(=O)CCCCCCCCCCCC	0.28	0.5	52926457	13	11.102	Phosphatidylglycerols		1
Plasmenyl-PC34:2	IQACMFWAGALEAQ-WESJWMGVSA-N	6443157	CCCCCCCCCCCCCCCCOC[C@H](COP(=O)([O-])OCC[N+](C)(C)C)OC(=O)CCCCCCC/C=C\C/C=C\CCCCC	0.06	0.55	6443157	2	14.454	Unsaturated_Phosphatidylcholines		1
Plasmenyl-PC36:6	JCIBOIAZHLGPOT-YAYDGDQKSA-N	70698851	CCCCCC/C=C\CCCCCCCC/C=C\O[C@H](COC(=O)CCCC/C=C\C/C=C\C/C=C\C/C=C\CC)COP(=O)([O-])OCC[N+](C)(C)C	0.17	0.62	70698851	2	14.653	Unsaturated_Phosphatidylcholines		1
Plasmenyl-PC38:5	FHHVIBPVBBRLOR-IYACIECVSA-N	24779390	CCCCCCCCCCCCCCCC/C=C\OC[C@H](COP(=O)([O-])OCC[N+](C)(C)C)OC(=O)CCC/C=C\C/C=C\C/C=C\C/C=C\CCCCC	0.0087	0.53	24779390	2	16.307	Unsaturated_Phosphatidylcholines		1
plasmenyl-PE36:3	XVXISDREVDGQPX-PISDLAQISA-N	52925079	CCCCCCCCCCCCCCCC/C=C\OC[C@H](COP(=O)(O)OCCN)OC(=O)CCCCCCC/C=C\C/C=C\CCCCC	0.047	0.53	52925079	33	15.385	Phosphatidylethanolamines		1
plasmenyl-PE36:5	UUYSKERSKRMYME-MAIXUNBTSA-N	52925126	CCCCCCCCCCCCCC/C=C\OC[C@H](COP(=O)(O)OCCN)OC(=O)CCC/C=C\C/C=C\C/C=C\C/C=C\CCCCC	0.15	1.4	52925126	11	14.731	Plasmalogens		1
plasmenyl-PE36:6	RLLOITCRNQRGJD-DFAKUSJGSA-N	52925061	CCCCCCCCCCCCCC/C=C\OC[C@H](COP(=O)(O)OCCN)OC(=O)CCC/C=C\C/C=C\C/C=C\C/C=C\C/C=C\CC	0.0033	0.66	52925061	11	14.404	Plasmalogens		1
plasmenyl-PE38:5	URPXXNCTXCOATD-FXMFQVEGSA-N	86289532	CCCCCCCCCCCCCCCC/C=C\OC[C@H](COP(=O)([O-])OCC[NH3+])OC(=O)CCC/C=C\C/C=C\C/C=C\C/C=C\CCCCC	0.039	0.68	86289532	11	16.403	Plasmalogens		1
plasmenyl-PE38:6	KCNBSSYOJRUKOM-JALPNNRCSA-N	52925089	CCCCCCCCCCCCCCCC/C=C\OC[C@H](COP(=O)(O)OCCN)OC(=O)CCC/C=C\C/C=C\C/C=C\C/C=C\C/C=C\CC	0.053	0.55	52925089	11	15.542	Plasmalogens		1
plasmenyl-PE38:7	WVGALBKSWOUIEZ-XNHMFJFDSA-N	5283497	CCCCCCCCCCCCCC/C=C\OC[C@H](COP(=O)(O)OCCN)OC(=O)CC/C=C\C/C=C\C/C=C\C/C=C\C/C=C\C/C=C\CC	0.13	1.4	5283497	11	15.215	Plasmalogens		1
Plasmenyl-PE40:6	CVCZYWPCMUWTNS-IXKBFPPMSA-N	52925119	CCCCCCCCCCCCCCCCCC/C=C\OC[C@H](COP(=O)(O)OCCN)OC(=O)CCC/C=C\C/C=C\C/C=C\C/C=C\C/C=C\CC	0.14	0.74	52925119	11	16.68	Plasmalogens		1
plasmenyl-PE40:7	FIJFPUAJUDAZEY-MNDXXDKYSA-N	42607458	CCCCCCCCCCCCCCCC/C=C\OC[C@H](COP(=O)(O)OCCN)OC(=O)CC/C=C\C/C=C\C/C=C\C/C=C\C/C=C\C/C=C\CC	0.074	1.3	42607458	11	16.353	Plasmalogens		1
PS38:3	BQBTWCBZEKRLFP-BGFRNLFWSA-N	52925523	CCCCCCCCCCCCCCCCCCCC(=O)O[C@H](COC(=O)CCCCCCC/C=C\C/C=C\C/C=C\CC)COP(=O)(O)OC[C@@H](C(=O)O)N	0.25	0.3	52925523	6	12.977	Phosphatidylserines		1
PS38:4	SVOUGFFDROZBJI-DNALCEECSA-N	24779545	CCCCCCCCCCCCCCCCCC(=O)OC[C@H](COP(=O)(O)OC[C@@H](C(=O)O)N)OC(=O)CCC/C=C\C/C=C\C/C=C\C/C=C\CCCCC	0.16	0.062	24779545	6	12.65	Phosphatidylserines		1
PS40:3	BTIQFPURPAGQHS-HOSNKBABSA-N	52925502	CCCCCCCCCCCCCCCCCCCCCC(=O)O[C@H](COC(=O)CCCC/C=C\C/C=C\C/C=C\CCCCC)COP(=O)(O)OC[C@@H](C(=O)O)N	0.36	0.62	52925502	6	14.115	Phosphatidylserines		1
PS40:4	GBBNRADSWUALEU-AEDAHVLISA-N	52925748	CCCCCCCCCCCCCCCCCCCC(=O)O[C@H](COC(=O)CCC/C=C\C/C=C\C/C=C\C/C=C\CCCCC)COP(=O)(O)OC[C@@H](C(=O)O)N	0.46	0.28	52925748	6	13.788	Phosphatidylserines		1
PS40:6	LYYHRRPTEXPVOR-SYEOQEKUSA-N	24779546	CCCCCCCCCCCCCCCCCC(=O)OC[C@H](COP(=O)(O)OC[C@@H](C(=O)O)N)OC(=O)CC/C=C\C/C=C\C/C=C\C/C=C\C/C=C\C/C=C\CC	0.27	0.42	24779546	6	13.134	Phosphatidylserines		1
PS42:5	VNQACVFLMLYTLE-WDLXSBMRSA-N	52925755	CCCCCCCCCC/C=C\CCCCCCCCCC(=O)O[C@H](COC(=O)CCC/C=C\C/C=C\C/C=C\C/C=C\CCCCC)COP(=O)(O)OC[C@@H](C(=O)O)N	0.37	1.3	52925755	6	14.41	Phosphatidylserines		1
PS42:6	WOBFEYJLJCLDBR-NISVGTQTSA-N	52925756	CCCCC/C=C\C/C=C\CCCCCCCCCCCC(=O)O[C@H](COC(=O)CCC/C=C\C/C=C\C/C=C\C/C=C\CCCCC)COP(=O)(O)OC[C@@H](C(=O)O)N	0.24	0.6	52925756	6	14.083	Phosphatidylserines		1
PS42:8	ROCNHMAZFKRILY-PRDJOCNNSA-N	52925757	CCCCC/C=C\C/C=C\C/C=C\C/C=C\CCCCCC(=O)O[C@H](COC(=O)CCC/C=C\C/C=C\C/C=C\C/C=C\CCCCC)COP(=O)(O)OC[C@@H](C(=O)O)N	0.036	1.6	52925757	6	13.429	Phosphatidylserines		1
PSp34:0	OHPHIZCKAAJKOG-PBSRCHRYSA-N	52926194	CCCCCCCCCCCCCCCCCC(=O)O[C@H](CO/C=C\CCCCCCCCCCCCCC)COP(=O)(O)OC[C@@H](C(=O)O)N	0.35	0.78	52926194	6	12.409	Phosphatidylserines		1
SM(d18:1/18:0)	LKQLRGMMMAHREN-YJFXYUILSA-N	6453725	CCCCCCCCCCCCCCCCCC(=O)N[C@@H](COP(=O)([O-])OCC[N+](C)(C)C)[C@@H](/C=C/CCCCCCCCCCCCC)O	0.064	0.47	6453725	3	14.034	Unsaturated_Phosphatidylcholines		1
SM(d18:1/18:1)	NBEADXWAAWCCDG-QDDWGVBQSA-N	6443882	CCCCCCCCCCCCC/C=C/[C@H]([C@H](COP(=O)([O-])OCC[N+](C)(C)C)NC(=O)CCCCCCC/C=C\CCCCCCCC)O	0.018	0.47	6443882	3	13.518	Sphingomyelins		1
SM(d18:1/20:1)	MDRFMTLYKHBJTF-NQYLGBTJSA-N	52931179	CCCCCCCCCCCCC/C=C/[C@H]([C@H](COP(=O)([O-])OCC[N+](C)(C)C)NC(=O)CCCCCCCCC/C=C\CCCCCCCC)O	0.088	0.5	52931179	3	14.656	Sphingomyelins		1
SM(d18:2/24:1)	TXFLWJQVQCDUDZ-BRUGZULGSA-N	52931215	CCCCCCCC/C=C\CCCCCCCCCCCCCC(=O)N[C@@H](COP(=O)([O-])OCC[N+](C)(C)C)[C@@H](/C=C/CCCCCCCC/C=C\CCC)O	0.24	1.7	52931215	3	16.416	Sphingomyelins		1
SM33:1	LQINJRUGTUOHGS-YPDYIYJKSA-N	52931139	CCCCCCCCCCCCCCC(=O)N[C@@H](COP(=O)([O-])OCC[N+](C)(C)C)[C@@H](/C=C/CCCCCCCCCCCCC)O	0.24	1.4	52931139	3	12.327	Sphingomyelins		1
SM34:0	QHZIGNLCLJPLCU-QPPIDDCLSA-N	9939965	CCCCCCCCCCCCCCC[C@H]([C@H](COP(=O)([O-])OCC[N+](C)(C)C)NC(=O)CCCCCCCCCCCCCCC)O	0.11	0.43	9939965	3	13.146	Saturated_Phosphatidylcholines		1
SMd18:1/14:0	KYICBZWZQPCUMO-PSALXKTOSA-N	11433862	CCCCCCCCCCCCC/C=C/[C@H]([C@H](COP(=O)([O-])OCC[N+](C)(C)C)NC(=O)CCCCCCCCCCCCC)O	0.15	1.4	11433862	3	11.758	Sphingomyelins		1
SMd18:1/16:0	RWKUXQNLWDTSLO-GWQJGLRPSA-N	9939941	CCCCCCCCCCCCCCCC(=O)N[C@@H](COP(=O)([O-])OCC[N+](C)(C)C)[C@@H](/C=C/CCCCCCCCCCCCC)O	0.09	2.3	9939941	3	12.896	Sphingomyelins		1
SMd18:1/16:1	YLWSJLLZUHSIEA-CKSUKHGVSA-N	52931235	CCCCCCCCCCCCCCCC(=O)N[C@@H](COP(=O)([O-])OCC[N+](C)(C)C)[C@@H](/C=C/CCCCCCCC/C=C\CCC)O	0.077	2	52931235	3	12.38	Sphingomyelins		1
SMd18:1/20:0	AADLTHQNYQJHQV-SVLGDMRNSA-N	44260124	CCCCCCCCCCCCCCCCCCCC(=O)N[C@@H](COP(=O)([O-])OCC[N+](C)(C)C)[C@@H](/C=C/CCCCCCCCCCCCC)O	0.35	1.3	44260124	3	15.172	Sphingomyelins		1
SMd18:1/21:0	YXSZOBWVQJIWNE-QVDCKBILSA-N	52931193	CCCCCCCCCCCCCCCCCCCCC(=O)N[C@@H](COP(=O)([O-])OCC[N+](C)(C)C)[C@@H](/C=C/CCCCCCCCCCCCC)O	0.32	1.2	52931193	3	15.741	Sphingomyelins		1
SMd18:1/22:0	FJJANLYCZUNFSE-TWKUQIQBSA-N	44260125	CCCCCCCCCCCCCCCCCCCCCC(=O)N[C@@H](COP(=O)([O-])OCC[N+](C)(C)C)[C@@H](/C=C/CCCCCCCCCCCCC)O	0.28	1.5	44260125	3	16.31	Sphingomyelins		1
SMd18:1/23:0	SXZWBNWTCVLZJN-NMIJJABPSA-N	46891684	CCCCCCCCCCCCCCCCCCCCCCC(=O)N[C@@H](COP(=O)([O-])OCC[N+](C)(C)C)[C@@H](/C=C/CCCCCCCCCCCCC)O	0.58	1.2	46891684	3	16.879	Sphingomyelins		1
SMd18:1/24:0	QEDPUVGSSDPBMD-XTAIVQBESA-N	44260127	CCCCCCCCCCCCCCCCCCCCCCCC(=O)N[C@@H](COP(=O)([O-])OCC[N+](C)(C)C)[C@@H](/C=C/CCCCCCCCCCCCC)O	0.16	1.7	44260127	3	17.448	Sphingomyelins		1
SMd18:2/23:0	JBDGKEXQKCCQFK-JWQIMADESA-N	52931209	CCCCCCCCCCCCCCCCCCCCCCC(=O)N[C@@H](COP(=O)([O-])OCC[N+](C)(C)C)[C@@H](/C=C/CCCCCCCC/C=C\CCC)O	0.41	1.4	52931209	3	16.363	Sphingomyelins		1
SMd18:2/24:0	DACOGJMBYLZYDH-GXJPFUDISA-N	52931217	CCCCCCCCCCCCCCCCCCCCCCCC(=O)N[C@@H](COP(=O)([O-])OCC[N+](C)(C)C)[C@@H](/C=C/CCCCCCCC/C=C\CCC)O	0.045	2.4	52931217	3	16.932	Sphingomyelins		1
TG42:0	DUXYWXYOBMKGIN-UHFFFAOYSA-N	11148	CCCCCCCCCCCCCC(=O)OCC(COC(=O)CCCCCCCCCCCCC)OC(=O)CCCCCCCCCCCCC	0.32	1.1	11148	8	19.876	Saturated_Triglycerides		1
TG44:1	UZLGGKDLJGDGEY-WVSHCNQOSA-N	56936554	CCCCCCCCCCCCCC(=O)OC[C@H](COC(=O)CCCCCCC/C=C\CCCCCC)OC(=O)CCCCCCCCCCCCC	0.31	1.1	56936554	1	20.498	Unsaturated_Triglycerides		1
TG46:0	JWVXCFSNEOMSHH-YACUFSJGSA-N	91865745	CCCCCCCCCCCCCCCC(=O)OC[C@@H](COC(=O)CCCCCCCCCCCCC)OC(=O)CCCCCCCCCCCCCCC	0.24	0.83	91865745	8	22.152	Saturated_Triglycerides		1
TG46:1	RSDIQTNCDWUNDP-JHXSWNAYSA-N	56936558	CCCCCCCCCCCCCC(=O)OC[C@H](COC(=O)CCCCCCC/C=C\CCCCCCCC)OC(=O)CCCCCCCCCCCCC	0.13	1.1	56936558	1	21.636	Unsaturated_Triglycerides		1
TG46:2	XUEMVUXNOCIHLG-MOFPORNTSA-N	56936582	CCCCCCCCCCCCCC(=O)OC[C@H](COC(=O)CCCCCCC/C=C\CCCCCC)OC(=O)CCCCCCC/C=C\CCCCCC	0.21	1.1	56936582	1	21.12	Unsaturated_Triglycerides		1
TG46:3	AQARPXOEHQBBQN-OJJDTYCWSA-N	56936561	CCCCCCCCCCCCCC(=O)OC[C@H](COC(=O)CCCCCCC/C=C\C/C=C\C/C=C\CC)OC(=O)CCCCCCCCCCCCC	0.27	0.89	56936561	1	20.982	Unsaturated_Triglycerides		1
TG48:0	PVNIQBQSYATKKL-UHFFFAOYSA-N	11147	CCCCCCCCCCCCCCCC(=O)OCC(COC(=O)CCCCCCCCCCCCCCC)OC(=O)CCCCCCCCCCCCCCC	0.48	0.88	11147	8	23.29	Saturated_Triglycerides		1
TG48:1	FEKLSEFRUGWUOS-DLOIZKPKSA-N	9543986	CCCCCCCCCCCCCCCC(=O)OC[C@H](COC(=O)CCCCCCC/C=C\CCCCCC)OC(=O)CCCCCCCCCCCCCCC	0.28	0.82	9543986	1	22.774	Unsaturated_Triglycerides		1
TG48:2	RUOVJPPUXXFZPC-YZEIBMOJSA-N	9543987	CCCCCCCCCCCCCCCC(=O)OC[C@H](COC(=O)CCCCCCC/C=C\CCCCCC)OC(=O)CCCCCCC/C=C\CCCCCC	0.27	1.1	9543987	1	22.258	Unsaturated_Triglycerides		1
TG48:3	SKGWNZXOCSYJQL-BUTYCLJRSA-N	9543989	CCCCCC/C=C\CCCCCCCC(=O)OCC(OC(=O)CCCCCCC/C=C\CCCCCC)COC(=O)CCCCCCC/C=C\CCCCCC	0.21	1.1	9543989	1	21.742	Unsaturated_Triglycerides		1
TG49:0	TTWJTJMWHOYBPQ-ANFMRNGASA-N	9543988	CCCCCCCCCCCCCCCCC(=O)OC[C@@H](COC(=O)CCCCCCCCCCCCCCC)OC(=O)CCCCCCCCCCCCCCC	0.11	0.81	9543988	8	23.859	Saturated_Triglycerides		1
TG49:1	VYYGQDOPVVYUKW-UKFBYESTSA-N	9543991	CCCCCCCCCCCCCCCC(=O)OC[C@H](COC(=O)CCCCCCC/C=C\CCCCCCC)OC(=O)CCCCCCCCCCCCCCC	0.11	0.85	9543991	1	23.343	Unsaturated_Triglycerides		1
TG49:2	QZYSUBAQYSVFNX-PSMULLBHSA-N	9543993	CCCCCCCCCCCCCCCCC(=O)OC[C@@H](COC(=O)CCCCCCC/C=C\CCCCCC)OC(=O)CCCCCCC/C=C\CCCCCC	0.052	0.81	9543993	1	22.827	Unsaturated_Triglycerides		1
TG50:0	QRJMBNGGFSPTQP-BXJPYAOGSA-N	3246958	[2H]C([2H])(C([2H])(C([2H])([2H])OC(=O)CCCCCCCCCCCCCCC)OC(=O)CCCCCCCCCCCCCCCCC)OC(=O)CCCCCCCCCCCCCCC	0.13	0.8	3246958	8	24.428	Glycols		1
TG50:1	YHMDGPZOSGBQRH-YYSBDVFPSA-N	25240460	CCCCCCCCCCCCCCCC(=O)OC[C@H](COC(=O)CCCCCCC/C=C\CCCCCCCC)OC(=O)CCCCCCCCCCCCCCC	0.29	1.3	25240460	1	23.912	Unsaturated_Triglycerides		1
TG50:2	QEZWFCZNHWUARW-XQCAQTCHSA-N	9544010	CCCCCCCCCCCCCCCCCC(=O)OC[C@@H](COC(=O)CCCCCCC/C=C\CCCCCC)OC(=O)CCCCCCC/C=C\CCCCCC	0.2	0.7	9544010	1	23.396	Unsaturated_Triglycerides		1
TG50:3	UFHNZOACKFBCOM-YXKNDSBASA-N	25240357	CCCCCCCC/C=C\CCCCCCCC(=O)OC[C@@H](COC(=O)CCCCCCC/C=C\CCCCCC)OC(=O)CCCCCCC/C=C\CCCCCC	0.16	0.8	25240357	1	22.88	Unsaturated_Triglycerides		1
TG50:4	PVMBAGXWHHZKFP-JMPJWMFJSA-N	25240359	CCCCCC/C=C\CCCCCCCC(=O)OC[C@H](COC(=O)CCCCCCC/C=C\C/C=C\CCCCC)OC(=O)CCCCCCC/C=C\CCCCCC	0.21	0.85	25240359	1	22.553	Unsaturated_Triglycerides		1
TG50:5	AFTBPUXZTDLRSP-UDQIKIEDSA-N	9544045	CCCCCC/C=C\CCCCCCCC(=O)OC[C@H](COC(=O)CCCCCCC/C=C\C/C=C\C/C=C\CC)OC(=O)CCCCCCC/C=C\CCCCCC	0.1	0.8	9544045	1	22.226	Unsaturated_Triglycerides		1
TG51:1	OZAXLAGNPZMZAD-BOEMPQCLSA-N	9544006	CCCCCCCCCCCCCCCCC(=O)OC[C@H](COC(=O)CCCCCCC/C=C\CCCCCCC)OC(=O)CCCCCCCCCCCCCCCC	0.077	0.84	9544006	1	24.481	Unsaturated_Triglycerides		1
TG51:2	NSNSZGBCOIKUBU-SZOKBDNISA-N	9544013	CCCCCCCCCCCCCCCCC(=O)OC[C@H](COC(=O)CCCCCCC/C=C\CCCCCCC)OC(=O)CCCCCCC/C=C\CCCCCCC	0.057	0.8	9544013	1	23.965	Unsaturated_Triglycerides		1
TG51:3	ISSGPXMQOMAFMJ-DMGKHJLRSA-N	9544023	CCCCCCC/C=C\CCCCCCCC(=O)OCC(OC(=O)CCCCCCC/C=C\CCCCCCC)COC(=O)CCCCCCC/C=C\CCCCCCC	0.053	0.78	9544023	1	23.449	Unsaturated_Triglycerides		1
TG51:4	IIRQXNVLAXQEKB-KBEZCZBDSA-N	9544052	CCCCCCCC/C=C\CCCCCCCC(=O)OC[C@@H](COC(=O)CCCCCCC/C=C\CCCCCC)OC(=O)CCCCCCC/C=C\C/C=C\CCCC	0.065	0.76	9544052	1	23.122	Unsaturated_Triglycerides		1
TG52:0	SDNYRTVJOFMYIW-OIVUAWODSA-N	545690	CCCCCCCCCCCCCCCCCC(=O)OC[C@@H](COC(=O)CCCCCCCCCCCCCCC)OC(=O)CCCCCCCCCCCCCCCCC	0.16	0.84	545690	8	25.566	Saturated_Triglycerides		1
TG52:1	NPCZZYKITFKRQZ-FQUZZJBASA-N	25240360	CCCCCCCCCCCCCCCCCC(=O)O[C@H](COC(=O)CCCCCCCCCCCCCCC)COC(=O)CCCCCCC/C=C\CCCCCCCC	0.097	0.8	25240360	1	25.05	Unsaturated_Triglycerides		1
TG52:2	KGLAHZTWGPHKFF-RISKEULASA-N	25240361	CCCCCCCCCCCCCCCC(=O)OC[C@H](COC(=O)CCCCCCC/C=C\C/C=C\CCCCC)OC(=O)CCCCCCC/C=C\CCCCCCCC	0.21	1.9	25240361	1	24.207	Unsaturated_Triglycerides		1
TG52:4	WHSWXEYWNPTUPW-HNJDVRDNSA-N	25240364	CCCCCCCC/C=C\CCCCCCCC(=O)O[C@H](COC(=O)CCCCCCC/C=C\CCCCCC)COC(=O)CCCCCCC/C=C\C/C=C\CCCCC	0.33	0.78	25240364	1	23.691	Unsaturated_Triglycerides		1
TG52:5	CQZAAIKPSLHIBC-KDJOUNIJSA-N	25240366	CCCCCC/C=C\CCCCCCCC(=O)OC[C@H](COC(=O)CCCCCCC/C=C\C/C=C\CCCCC)OC(=O)CCCCCCC/C=C\C/C=C\CCCCC	0.48	0.9	25240366	1	23.364	Unsaturated_Triglycerides		1
TG53:0	ZJUXHXMIKPSINE-IONAWPRUSA-N	9544181	CCCCCCCCCCCCCCCCCCCCC(=O)OC[C@@H](COC(=O)CCCCCCCCCCCCCCC)OC(=O)CCCCCCCCCCCCCCC	0.084	0.66	9544181	8	26.135	Saturated_Triglycerides		1
TG53:1	WWJIBIGWKGFVAQ-JNSYTQKUSA-N	9544081	CCCCCCCCCCCCCCCCCC(=O)OC[C@@H](COC(=O)CCCCCCC/C=C\CCCCCCC)OC(=O)CCCCCCCCCCCCCCCCC	0.12	0.84	9544081	1	25.619	Unsaturated_Triglycerides		1
TG53:2	RSINITWKVQRWSZ-RFVLVDBCSA-N	9544102	CCCCCCCCCCCCCCCCCC(=O)OC[C@@H](COC(=O)CCCCCCC/C=C\C/C=C\CCCC)OC(=O)CCCCCCCCCCCCCCCCC	0.067	0.76	9544102	1	25.292	Unsaturated_Triglycerides		1
TG53:3	ZNQBEJJYVJSZLM-LEDQTTRKSA-N	9544126	CCCCCCCC/C=C\CCCCCCCC(=O)OC[C@@H](COC(=O)CCCCCCC/C=C\CCCCCCC)OC(=O)CCCCCCC/C=C\CCCCCCCC	0.047	0.76	9544126	1	24.587	Unsaturated_Triglycerides		1
TG53:4	BMSDHYZLQWTKSQ-LSJAAEOESA-N	9544152	CCCCCCCC/C=C\CCCCCCCC(=O)OC[C@@H](COC(=O)CCCCCCC/C=C\C/C=C\CCCC)OC(=O)CCCCCCC/C=C\CCCCCCCC	0.061	0.73	9544152	1	24.26	Unsaturated_Triglycerides		1
TG53:5	QHYAATSKYBYSLG-BXDFBOBBSA-N	9544183	CCCCCCC/C=C\CCCCCCCC(=O)OC[C@H](COC(=O)CCCCCCC/C=C\C/C=C\CCCCC)OC(=O)CCCCCCC/C=C\C/C=C\CCCCC	0.067	0.72	9544183	1	23.933	Unsaturated_Triglycerides		1
TG54:0	DCXXMTOCNZCJGO-UHFFFAOYSA-N	11146	CCCCCCCCCCCCCCCCCC(=O)OCC(COC(=O)CCCCCCCCCCCCCCCCC)OC(=O)CCCCCCCCCCCCCCCCC	0.13	0.72	11146	8	26.704	Saturated_Triglycerides		1
TG54:1	YFFIQXNTTVSKJC-NZEOUKRFSA-N	16058371	CCCCCCCCCCCCCCCCCC(=O)OC[C@H](COC(=O)CCCCCCC/C=C\CCCCCCCC)OC(=O)CCCCCCCCCCCCCCCCC	0.047	0.79	16058371	1	26.188	Unsaturated_Triglycerides		1
TG54:2	RYNHWWNZNIGDAQ-BMTCQUSZSA-N	16058372	CCCCCCCCCCCCCCCCCC(=O)OC[C@H](COC(=O)CCCCCCC/C=C\CCCCCCCC)OC(=O)CCCCCCC/C=C\CCCCCCCC	0.11	0.75	16058372	1	25.672	Unsaturated_Triglycerides		1
TG54:3	PHYFQTYBJUILEZ-IUPFWZBJSA-N	5497163	CCCCCCCC/C=C\CCCCCCCC(=O)OCC(OC(=O)CCCCCCC/C=C\CCCCCCCC)COC(=O)CCCCCCC/C=C\CCCCCCCC	0.18	0.65	5497163	1	25.156	Unsaturated_Triglycerides		1
TG54:4	BRLGHZXETDWABO-NOFIOOQLSA-N	9544255	CCCCCCCCCCCCCCCCCC(=O)OC[C@H](COC(=O)CCCCCCC/C=C\C/C=C\C/C=C\CC)OC(=O)CCCCCCC/C=C\CCCCCCCC	0.62	0.88	9544255	1	25.018	Unsaturated_Triglycerides		1
TG54:5	VVEBTVMJPTZDHO-YQFZQLSNSA-N	25240373	CCCCCCCC/C=C\CCCCCCCC(=O)OC[C@H](COC(=O)CCCCCCC/C=C\C/C=C\CCCCC)OC(=O)CCCCCCC/C=C\C/C=C\CCCCC	0.1	0.67	25240373	1	24.502	Unsaturated_Triglycerides		1
TG54:6	HBOQXIRUPVQLKX-BBWANDEASA-N	5322095	CCCCC/C=C\C/C=C\CCCCCCCC(=O)OCC(OC(=O)CCCCCCC/C=C\C/C=C\CCCCC)COC(=O)CCCCCCC/C=C\C/C=C\CCCCC	0.22	0.85	5322095	1	24.175	Unsaturated_Triglycerides		1
TG54:8	BMPVTDWOWBNPJU-NYRSPQLFSA-N	9544413	CCCCC/C=C\C/C=C\C/C=C\C/C=C\CCCC(=O)OC[C@@H](COC(=O)CCCCCCC/C=C\C/C=C\CCCC)OC(=O)CCCCCCC/C=C\C/C=C\CCCC	0.073	1.3	9544413	1	23.521	Unsaturated_Triglycerides		1
TG56:1	OCYFAHIHWCVZKS-FHSLLVMSSA-N	9544345	CCCCCCCCCCCCCCCCCCCC(=O)OC[C@@H](COC(=O)CCCCCCCCCCCCCCCCC)OC(=O)CCCCCCC/C=C\CCCCCCCC	0.12	0.8	9544345	1	27.326	Unsaturated_Triglycerides		1
TG56:2	PDEQUPGHMOMBFC-FYEHETCMSA-N	9544390	CCCCCCCCCCCCCCCCCCCC(=O)OC[C@@H](COC(=O)CCCCCCCCCCCCCCCCC)OC(=O)CCCCCCC/C=C\C/C=C\CCCCC	0.045	0.75	9544390	1	26.999	Unsaturated_Triglycerides		1
TG56:3	QXMHHXQBBKDSSL-BAQZNRHJSA-N	9544447	CCCCCCCC/C=C\CCCCCCCCCC(=O)OC[C@@H](COC(=O)CCCCCCC/C=C\CCCCCCCC)OC(=O)CCCCCCC/C=C\CCCCCCCC	0.18	0.8	9544447	1	26.294	Unsaturated_Triglycerides		1
TG56:4	YONCDTJKIZDSKQ-IYASBODOSA-N	25240379	CCCCCCCC/C=C\CCCCCCCCCC(=O)OC[C@@H](COC(=O)CCCCCCC/C=C\CCCCCCCC)OC(=O)CCCCCCC/C=C\C/C=C\CCCCC	0.48	0.9	25240379	1	25.967	Unsaturated_Triglycerides		1
TG56:5	UHEJWASONFIROS-YPSHDQQVSA-N	25240380	CCCCCCCC/C=C\CCCCCCCCCC(=O)OC[C@@H](COC(=O)CCCCCCC/C=C\C/C=C\CCCCC)OC(=O)CCCCCCC/C=C\C/C=C\CCCCC	0.7	0.92	25240380	1	25.64	Unsaturated_Triglycerides		1
TG56:6	ZTNDRFCABXFVMY-WJTCTALZSA-N	9544625	CCCCC/C=C\C/C=C\CCCCCCCCCC(=O)OC[C@@H](COC(=O)CCCCCCC/C=C\C/C=C\CCCCC)OC(=O)CCCCCCC/C=C\C/C=C\CCCCC	0.44	0.86	9544625	1	25.313	Unsaturated_Triglycerides		1
TG56:7	DODZUDCYRVWEOJ-GKZBLMSTSA-N	9544695	CCCCC/C=C\C/C=C\CCCCCCCC(=O)OC[C@H](COC(=O)CCCCCC/C=C\C/C=C\C/C=C\CCCCC)OC(=O)CCCCCCC/C=C\C/C=C\CCCCC	0.3	1.2	9544695	1	24.986	Unsaturated_Triglycerides		1
TG56:8	UBGUHMDKBGQUND-VPFWBQFRSA-N	9544762	CCCCCCCCCCCCCCCC(=O)OC[C@H](COC(=O)CCC/C=C\C/C=C\C/C=C\C/C=C\CCCCC)OC(=O)CCC/C=C\C/C=C\C/C=C\C/C=C\CCCCC	0.27	1.2	9544762	1	24.848	Unsaturated_Triglycerides		1
TG58:1	OWZMHFAFGQCCNI-FBXRAONGSA-N	25240381	CCCCCCCCCCCCCCCCCCCC(=O)OC[C@@H](COC(=O)CCCCCCC/C=C\CCCCCCCC)OC(=O)CCCCCCCCCCCCCCCCCCC	0.077	0.75	25240381	1	28.464	Unsaturated_Triglycerides		1
TG58:2	GXWBCAVCOMAOHT-VMCJOIRWSA-N	9545277	CCCCC/C=C\C/C=C\CCCCCCCC(=O)OC[C@H](COC(=O)CCC/C=C\C/C=C\C/C=C\C/C=C\CCCCC)OC(=O)CCC/C=C\C/C=C\C/C=C\C/C=C\CCCCC	0.082	0.77	9545277	1	25.143	Unsaturated_Triglycerides		1
TG58:3	RFMSTHTUAZETPD-JJPHLYBUSA-N	9544748	CCCCCCCC/C=C\CCCCCCCCCC(=O)OC[C@@H](COC(=O)CCCCCCC/C=C\CCCCCCCC)OC(=O)CCCCCCCCC/C=C\CCCCCCCC	0.13	0.82	9544748	1	27.432	Unsaturated_Triglycerides		1
TG58:4	CCKRHDUCFMOBKX-AAINFQTBSA-N	9544835	CCCCCCCCCCCCCCCCCCCC(=O)O[C@H](COC(=O)CCCCCCCCCCCCCCCCC)COC(=O)CCC/C=C\C/C=C\C/C=C\C/C=C\CCCCC	0.12	0.77	9544835	1	27.483	Unsaturated_Triglycerides		1
TG58:6	GSNFRUMSEHHPSY-LCXCSEBNSA-N	9544977	CCCCCCCC/C=C\CCCCCCCCCC(=O)O[C@H](COC(=O)CCCCCCC/C=C\CCCCCCCC)COC(=O)CCC/C=C\C/C=C\C/C=C\C/C=C\CCCCC	0.061	0.75	9544977	1	26.451	Unsaturated_Triglycerides		1
TG58:8	KWIGMCRWEINBIR-HUPVKWKYSA-N	9545124	CCCCCCCCCCCCCCCCCC(=O)OC[C@H](COC(=O)CCC/C=C\C/C=C\C/C=C\C/C=C\CCCCC)OC(=O)CCC/C=C\C/C=C\C/C=C\C/C=C\CCCCC	0.13	1.2	9545124	1	25.986	Unsaturated_Triglycerides		1
TG58:9	RVXFSLZMZOFGEQ-SWIIBWKZSA-N	9545200	CCCCCCCC/C=C\CCCCCCCC(=O)OC[C@H](COC(=O)CCC/C=C\C/C=C\C/C=C\C/C=C\CCCCC)OC(=O)CCC/C=C\C/C=C\C/C=C\C/C=C\CCCCC	0.66	0.93	9545200	1	25.47	Unsaturated_Triglycerides		1
TG60:1	YNDXXWKSWMKVGO-HZLQDPIMSA-N	9544965	CCCCCCCCCCCCCCCCCCCC(=O)OC[C@H](COC(=O)CCCCCCCCC/C=C\CCCCCCCC)OC(=O)CCCCCCCCCCCCCCCCCCC	0.11	0.75	9544965	1	29.602	Unsaturated_Triglycerides		1
TG60:11	ASSZWZBQIXMMKM-SYTPEAHJSA-N	9545730	CCCCC/C=C\C/C=C\C/C=C\CCCCCCC(=O)OC[C@H](COC(=O)CCC/C=C\C/C=C\C/C=C\C/C=C\CCCCC)OC(=O)CCC/C=C\C/C=C\C/C=C\C/C=C\CCCCC	0.54	0.89	9545730	1	25.954	Unsaturated_Triglycerides		1
TG60:2	QPNVLDQSHXVPMG-JMYPUKFOSA-N	9545040	CCCCCCCCCCCCCCCCCCCC(=O)OC[C@H](COC(=O)CCCCCCCCC/C=C\CCCCCCCC)OC(=O)CCCCCCCCC/C=C\CCCCCCCC	0.02	0.69	9545040	1	29.086	Unsaturated_Triglycerides		1
TG62:1	TZLOSVAFXBPUQT-VBMMIZSXSA-N	9545526	CCCCCCCCCCCCCCCCCCCCCC(=O)OC[C@H](COC(=O)CCCCCCCCCCCCCCCCCCC)OC(=O)CCCCCCCCC/C=C\CCCCCCCC	0.018	0.58	9545526	1	30.74	Unsaturated_Triglycerides		1

## Sheet: Supp T5
Supplemental Table T5: ChemRICH enrichment analysis input compound ID's, p-values and foldchange (converted from odds ratio) for IAA-first
Compound.Name	InChiKeys	Pubchem.ID	SMILES	pvalue	foldchange	CID	ClusterNumber	xlogp	ClusterLabel	TreeLabels	FDR
1-monoolein	RZRNAYUHWVFMIP-KTKRTIGZSA-N	5283468	CCCCCCCC/C=C\CCCCCCCC(=O)OCC(CO)O	0.0055	1.3	5283468	10	7.132	Unsaturated_Diglycerides		1
1-monopalmitin	QHZLMUACJMDIAE-UHFFFAOYSA-N	14900	CCCCCCCCCCCCCCCC(=O)OCC(CO)O	0.092	0.84	14900	13	6.51	Glycerides		1
1-monostearin	VBICKXHEKHSIBG-UHFFFAOYSA-N	24699	CCCCCCCCCCCCCCCCCC(=O)OCC(CO)O	0.22	0.89	24699	13	7.648	Glycerides		1
1,2-dihydroxycylohexane NIST	PFURGBBHAOXLIO-UHFFFAOYSA-N	13601	C1CCC(C(C1)O)O	0.49	0.93	13601	40	0.517	Cyclohexanols		1
1,5-anhydroglucitol	MPCAJMNYNOGXPB-SLPGGIOYSA-N	64960	C1[C@@H]([C@H]([C@@H]([C@H](O1)CO)O)O)O	0.32	1.1	64960	14	-1.591	Hexoses		1
2-deoxytetronic acid	DZAIOXUZHHTJKN-UHFFFAOYSA-N	150929	C(C(CO)O)C(=O)O	0.39	0.9	150929	5	-1.631	Hydroxybutyrates		1
2-deoxytetronic acid NIST	UFYGCFHQAXXBCF-UHFFFAOYSA-N	192742	C(CO)C(C(=O)O)O	0.32	1.2	192742	5	-1.365	Glycols		1
2-hydroxybutanoic acid	AFENDNXGAFYKQO-VKHMYHEASA-N	440864	CC[C@@H](C(=O)O)O	0.55	0.88	440864	22	-0.233	Hydroxybutyrates		1
2-hydroxyglutaric acid	HWXBTNAVRSUOJR-UHFFFAOYSA-N	43	C(CC(=O)O)C(C(=O)O)O	0.15	1.2	43	49	-1.116	Glutarates		1
2-hydroxyvaleric acid	JRHWHSJDIILJAT-UHFFFAOYSA-N	98009	CCCC(C(=O)O)O	0.2	1.2	98009	22	0.336	Hydroxybutyrates		1
2-ketoisocaproic acid	BKAJNAXTPSGJCU-UHFFFAOYSA-N	70	CC(C)CC(=O)C(=O)O	0.16	1.3	70	37	0.904	Keto Acids		1
2-ketoisovaleric acid	QHKABHOOEWYVLI-UHFFFAOYSA-N	49	CC(C)C(=O)C(=O)O	0.43	0.92	49	37	0.12	Keto Acids		1
2,3-dihydroxybutanoic acid NIST	LOUGYXZSURQALL-UHFFFAOYSA-N	250402	CC(C(C(=O)O)O)O	0.069	1.3	250402	5	-1.263	Sugar Acids		1
3-aminoisobutyric acid	QCHPKSFMDHPSNR-UHFFFAOYSA-N	64956	CC(CN)C(=O)O	0.65	1.1	64956	24	-0.733	Amino Acids		1
3-hydroxybutyric acid	WHBMMWSBFZVSSR-GSVOUGTGSA-N	92135	C[C@H](CC(=O)O)O	0.26	0.91	92135	5	-0.499	Hydroxybutyrates		1
5-methoxytryptamine	JTEJPPKMYBDEMY-UHFFFAOYSA-N	1833	COC1=CC2=C(C=C1)NC=C2CCN	0.00055	0.7	1833	51	0.687	Serotonin		0.18
aconitic acid	GTZCVFVGUGFEME-IWQZZHSRSA-N	643757	C(/C(=C/C(=O)O)/C(=O)O)C(=O)O	0.56	0.9	643757	25	-1.034	Dicarboxylic Acids		1
adipic acid	WNLRTRBMVRJNCN-UHFFFAOYSA-N	196	C(CCC(=O)O)CC(=O)O	0.44	0.93	196	4	0.006	Dicarboxylic Acids		1
alanine	QNAYBMKLOCPYGJ-REOHCLBHSA-N	5950	C[C@@H](C(=O)O)N	0.26	1.5	5950	50	-2.824	Amino Acids	a	1
alpha-ketoglutarate	KPGXRSRHYNQIFN-UHFFFAOYSA-N	51	C(CC(=O)O)C(=O)C(=O)O	0.03	0.77	51	41	-1.056	Glutarates		1
aminomalonate	JINBYESILADKFW-UHFFFAOYSA-N	100714	C(C(=O)O)(C(=O)O)N	0.088	1.2	100714	39	-3.523	Dicarboxylic Acids		1
arachidic acid	VKOBVWXKNCXXDE-UHFFFAOYSA-N	10467	CCCCCCCCCCCCCCCCCCCC(=O)O	0.27	0.82	10467	4	9.846	Saturated FA		1
arachidonic acid	YZXBAPSDXZZRGB-DOFZRALJSA-N	444899	CCCCC/C=C\C/C=C\C/C=C\C/C=C\CCCC(=O)O	0.45	1.1	444899	15	8.349	UnSaturated FA		1
ascorbic acid	CIWBSHSKHKDKBQ-JLAZNSOCSA-N	54670067	C([C@@H]([C@@H]1C(=C(C(=O)O1)O)O)O)O	0.29	1.1	54670067	25	-0.178	Sugar Acids		1
asparagine	DCXYFEDJOCDNAF-REOHCLBHSA-N	6267	C([C@@H](C(=O)O)N)C(=O)N	0.27	1.3	6267	53	-4.435	Amino Acids, Basic		1
aspartic acid	CKLJMWTZIZZHCS-REOHCLBHSA-N	5960	C([C@@H](C(=O)O)N)C(=O)O	0.14	1.3	5960	53	-3.707	Amino Acids		1
azelaic acid	BDJRBEYXGGNYIS-UHFFFAOYSA-N	2266	C(CCCC(=O)O)CCCC(=O)O	0.68	1	2266	4	1.713	Saturated FA		1
behenic acid	UKMSUNONTOPOIO-UHFFFAOYSA-N	8215	CCCCCCCCCCCCCCCCCCCCCC(=O)O	0.6	1.1	8215	4	10.984	Saturated FA		1
benzoic acid	WPYMKLBDIGXBTP-UHFFFAOYSA-N	243	C1=CC=C(C=C1)C(=O)O	0.26	0.82	243	17	0.982	Benzoates		1
benzylalcohol	IWDCLRJOBJJRNH-UHFFFAOYSA-N	2879	CC1=CC=C(C=C1)O	0.35	1.1	2879	17	1.338	Cresols		1
beta-alanine	UCMIRNVEIXFBKS-UHFFFAOYSA-N	239	C(CN)C(=O)O	0.22	0.82	239	24	-1.026	Amino Acids		1
capric acid	GHVNFZFCNZKVNT-UHFFFAOYSA-N	2969	CCCCCCCCCC(=O)O	0.25	0.84	2969	4	4.156	Saturated FA		1
caprylic acid	WWZKQHOCKIZLMA-UHFFFAOYSA-N	379	CCCCCCCC(=O)O	0.61	1.1	379	4	3.018	Saturated FA		1
cholesterol	HVYWMOMLDIMFJA-DPAQBDIFSA-N	5997	C[C@H](CCCC(C)C)[C@H]1CC[C@@H]2[C@@]1(CC[C@H]3[C@H]2CC=C4[C@@]3(CC[C@@H](C4)O)C)C	0.31	0.86	5997	9	10.518	Cholestenes		1
citramalic acid	XFTRTWQBIOMVPK-UHFFFAOYSA-N	1081	CC(CC(=O)O)(C(=O)O)O	0.2	0.82	1081	5	-1.364	Dicarboxylic Acids		1
conduritol-beta-epoxide	ZHMWOVGZCINIHW-SPHYCDKFSA-N	9989541	[C@@H]1([C@@H]([C@H](C2C([C@@H]1O)O2)O)O)O	0.14	0.85	9989541	14	-1.727	Cyclitols		1
creatinine	DDRJAANPRJIHGJ-UHFFFAOYSA-N	588	CN1CC(=O)N=C1N	0.27	1.1	588	56	-0.126	Imidazoles		1
cysteine	XUJNEKJLAYXESH-REOHCLBHSA-N	5862	C([C@@H](C(=O)O)N)S	0.88	1	5862	38	-2.575	Amino Acids, Sulfur		1
cystine	LEVWYRKDKASIDU-UHFFFAOYSA-N	595	C(C(C(=O)O)N)SSCC(C(=O)O)N	0.31	1.2	595	38	-3.312	Amino Acids, Sulfur		1
dehydroascorbic acid	SBJKKFFYIZUCET-JLAZNSOCSA-N	440667	C([C@@H]([C@@H]1C(=O)C(=O)C(=O)O1)O)O	0.016	1.3	440667	29	-1.878	Sugar Acids	b	1
deoxypentitol	FJGNTEKSQVNVTJ-UHFFFAOYSA-N	270738	CC(C(C(CO)O)O)O	0.092	1.3	270738	19	-2.092	Sugar Alcohols		1
diglycerol	GPLRAVKSCUXZTP-UHFFFAOYSA-N	42953	C(C(COCC(CO)O)O)O	0.023	0.67	42953	27	-2.742	Sugar Alcohols	c	1
epsilon-caprolactam	JBKVHLHDHHXQEQ-UHFFFAOYSA-N	7768	C1CCC(=O)NCC1	0.2	0.86	7768	52	0.404	Lactams		1
erythritol	UNXHWFMMPAWVPI-ZXZARUISSA-N	222285	C([C@H]([C@H](CO)O)O)O	0.36	1.2	222285	43	-2.552	Sugar Alcohols		1
erythronic acid lactone	SGMJBNSHAZVGMC-PWNYCUMCSA-N	5325915	C1[C@H]([C@H](C(=O)O1)O)O	0.043	0.7	5325915	5	-0.717	Butyrates		1
ethanolamine	HZAXFHJVJLSVMW-UHFFFAOYSA-N	700	C(CO)N	0.13	1.1	700	42	-1.275	Ethanolamines		1
fructose	RFSUNEUAIZKAJO-ARQDHWQXSA-N	439709	C([C@@H]1[C@H]([C@@H]([C@](O1)(CO)O)O)O)O	0.5	1	439709	35	-1.74	Hexoses		1
fucose	SHZGCJCMOBCMKK-FPRJBGLDSA-N	439650	C[C@@H]1[C@@H]([C@@H]([C@H]([C@@H](O1)O)O)O)O	0.31	0.89	439650	14	-0.994	Hexoses		1
fumaric acid	VZCYOOQTPOCHFL-OWOJBTEDSA-N	444972	C(=C/C(=O)O)\C(=O)O	0.19	0.8	444972	25	-0.416	Dicarboxylic Acids		1
galactonic acid	RGHNJXZEOKUKBD-MGCNEYSASA-N	128869	C([C@H]([C@@H]([C@@H]([C@H](C(=O)O)O)O)O)O)O	0.38	0.88	128869	29	-3.739	Sugar Acids	b	1
gamma-aminobutyric acid	BTCSSZJGUNDROE-UHFFFAOYSA-N	119	C(CC(=O)O)CN	0.0036	1.4	119	24	-0.668	Butyrates		1
gluconic acid	RGHNJXZEOKUKBD-QTBDOELSSA-N	6857417	C([C@@H]([C@H]([C@@H]([C@@H](C(=O)O)O)O)O)O)O	0.097	0.72	6857417	29	-3.739	Sugar Acids	b	1
glucose	WQZGKKKJIJFFOK-VFUOTHLCSA-N	64689	C([C@@H]1[C@H]([C@@H]([C@H]([C@@H](O1)O)O)O)O)O	0.05	0.79	64689	14	-1.697	Hexoses		1
glutamic acid	WHUUTDBJXJRKMK-VKHMYHEASA-N	33032	C(CC(=O)O)[C@@H](C(=O)O)N	0.075	1.4	33032	23	-3.349	Glutamates		1
glutamine	ZDXPYRJPNDTMRX-VKHMYHEASA-N	5961	C(CC(=O)N)[C@@H](C(=O)O)N	0.046	0.58	5961	23	-4.077	Amino Acids, Basic		1
glutaric acid	JFCQEDHGNNZCLN-UHFFFAOYSA-N	743	C(CC(=O)O)CC(=O)O	0.059	0.72	743	41	-0.352	Glutarates		1
glyceric acid	RBNPOMFGQQGHHO-UWTATZPHSA-N	439194	C([C@H](C(=O)O)O)O	0.26	1.3	439194	5	-1.723	Sugar Acids		1
glycerol	PEDCQBHIVMGVHV-UHFFFAOYSA-N	753	C(C(CO)O)O	0.016	0.58	753	27	-1.88	Sugar Alcohols	c	1
glycerol-3-galactoside	NHJUPBDCSOGIKX-NTXXKDEISA-N	16048618	C([C@@H]1[C@@H]([C@@H]([C@H]([C@@H](O1)OC[C@@H](CO)O)O)O)O)O	0.29	0.84	16048618	30	-2.988	Sugar Alcohols		1
glycerol-alpha-phosphate	AWUCVROLDVIAJX-UHFFFAOYSA-N	754	C(C(COP(=O)(O)O)O)O	0.13	0.83	754	27	-3.109	Glycerophosphates	c	1
glycine	DHMQDGOQFOQNFH-UHFFFAOYSA-N	750	C(C(=O)O)N	0.27	1.4	750	24	-3.35	Amino Acids		1
glycolic acid	AEMRFAOFKBGASW-UHFFFAOYSA-N	757	C(C(=O)O)O	0.46	1.1	757	22	-1.117	Glycolates		1
heptadecanoic acid	KEMQGTRYUADPNZ-UHFFFAOYSA-N	10465	CCCCCCCCCCCCCCCCC(=O)O	0.33	0.78	10465	4	8.139	Saturated FA		1
hexitol	FBPFZTCFMRRESA-UHFFFAOYSA-N	453	C(C(C(C(C(CO)O)O)O)O)O	0.11	0.85	453	40	-3.896	Sugar Alcohols		1
hippuric acid	QIAFMBKCNZACKA-UHFFFAOYSA-N	464	C1=CC=C(C=C1)C(=O)NCC(=O)O	0.51	0.96	464	26	0.154	Hippurates		1
histidine	HNDVDQJCIGZPNO-YFKPBYRVSA-N	6274	C1=C(NC=N1)C[C@@H](C(=O)O)N	0.015	1.9	6274	28	-3.429	Amino Acids, Cyclic		1
hydroxycarbamate NIST	DRAJWRKLRBNJRQ-UHFFFAOYSA-M	16639161	C(=O)(NO)O	0.38	0.89	16639161	55	-0.878			1
indole-3-acetate	SEOVTRFCIGRIMH-UHFFFAOYSA-N	802	C1=CC=C2C(=C1)C(=CN2)CC(=O)O	0.078	1.3	802	21	0.805	Indoles		1
indole-3-lactate	XGILAAMKEQUXLS-UHFFFAOYSA-N	92904	C1=CC=C2C(=C1)C(=CN2)CC(C(=O)O)O	0.06	1.4	92904	21	0.21	Indoles		1
indoxyl sulfate	BXFFHSIDQOFMLE-UHFFFAOYSA-N	10258	C1=CC=C2C(=C1)C(=CN2)OS(=O)(=O)O	0.18	0.82	10258	51	-0.075	Indoles		1
inosine	UGQMRVRMYYASKQ-KQYNXXCUSA-N	6021	C1=NC2=C(C(=O)N1)N=CN2[C@H]3[C@@H]([C@@H]([C@H](O3)CO)O)O	0.12	0.85	6021	28	-1.947	Purine Nucleosides		1
isoheptadecanoic acid NIST	IIUXHTGBZYEGHI-UHFFFAOYSA-N	164860	CC(C)CCCCCCCCCCCCCC(=O)O	0.36	0.89	164860	4	8.078	Saturated FA		1
isoleucine	AGPKZVBTJJNPAG-WHFBIAKZSA-N	6306	CC[C@H](C)[C@@H](C(=O)O)N	0.31	1.4	6306	34	-1.6	Amino Acids, Branched-Chain		1
isothreonic acid	JPIJQSOTBSSVTP-GBXIJSLDSA-N	151152	C([C@H]([C@@H](C(=O)O)O)O)O	0.19	0.69	151152	5	-2.395	Butyrates		1
itaconic acid	LVHBHZANLOWSRM-UHFFFAOYSA-N	811	C=C(CC(=O)O)C(=O)O	0.035	1.4	811	25	-0.406	Dicarboxylic Acids		1
lactamide	SXQFCVDSOLSHOQ-UHFFFAOYSA-N	94220	CC(C(=O)N)O	0.016	1.2	94220	42	-1.319	Amides		1
lactic acid	JVTAAEKCZFNVCJ-UHFFFAOYSA-N	612	CC(C(=O)O)O	0.15	1.2	612	22	-0.591	Hydroxybutyrates		1
lactose	GUBGYTABKSRVRQ-QKKXKWKRSA-N	440995	C([C@@H]1[C@@H]([C@@H]([C@H]([C@@H](O1)O[C@@H]2[C@H](OC([C@@H]([C@H]2O)O)O)CO)O)O)O)O	0.053	1.3	440995	30	-3.663	Disaccharides		1
lactulose	JCQLYHFGKNRPGE-FCVZTGTOSA-N	11333	C([C@@H]1[C@@H]([C@@H]([C@H]([C@@H](O1)O[C@@H]2[C@H](O[C@@]([C@H]2O)(CO)O)CO)O)O)O)O	0.27	1.1	11333	31	-3.706	Disaccharides		1
lauric acid	POULHZVOKOAJMA-UHFFFAOYSA-N	3893	CCCCCCCCCCCC(=O)O	0.0049	0.67	3893	4	5.294	Saturated FA		1
leucine	ROHFNLRQFUQHCH-YFKPBYRVSA-N	6106	CC(C)C[C@@H](C(=O)O)N	0.036	2	6106	34	-1.389	Amino Acids, Branched-Chain		1
levoglucosan	TWNIBLMWSKIRAT-VFUOTHLCSA-N	2724705	C1[C@@H]2[C@H]([C@@H]([C@H]([C@H](O1)O2)O)O)O	0.06	1.2	2724705	31	-1.537	Hexoses		1
linoleic acid	OYHQOLUKZRVURQ-HZJYTTRNSA-N	5280450	CCCCC/C=C\C/C=C\CCCCCCCC(=O)O	0.19	0.81	5280450	15	7.865	UnSaturated FA		1
lysine	KDXKERNSBIXSRK-YFKPBYRVSA-N	5962	C(CCN)C[C@@H](C(=O)O)N	0.028	1.9	5962	23	-2.949	Amino Acids, Basic		1
lyxitol	HEBKCHPVOIAQTA-IMJSIDKUSA-N	439255	C([C@@H](C([C@H](CO)O)O)O)O	0.054	0.59	439255	19	-3.224	Sugar Alcohols		1
maleimide	PEEHTFAAVSWFBL-UHFFFAOYSA-N	10935	C1=CC(=O)NC1=O	0.099	1.3	10935	56	-0.676	Maleimides		1
malic acid	BJEPYKJPYRNKOW-UHFFFAOYSA-N	525	C(C(C(=O)O)O)C(=O)O	0.097	0.71	525	5	-1.474	Dicarboxylic Acids		1
maltose	GUBGYTABKSRVRQ-PICCSMPSSA-N	439186	C([C@@H]1[C@H]([C@@H]([C@H]([C@H](O1)O[C@@H]2[C@H](OC([C@@H]([C@H]2O)O)O)CO)O)O)O)O	0.091	0.84	439186	30	-3.663	Disaccharides		1
methanolphosphate	CAAULPUQFIIOTL-UHFFFAOYSA-N	13130	COP(=O)(O)O	0.095	0.78	13130	54	-1.728	Organophosphates		1
methionine	FFEARJCKVFRZRR-BYPYZUCNSA-N	6137	CSCC[C@@H](C(=O)O)N	0.33	0.9	6137	48	-1.853	Amino Acids, Sulfur		1
methionine sulfoxide	QEFRNWWLZKMPFJ-YGVKFDHGSA-N	158980	CS(=O)CC[C@@H](C(=O)O)N	0.017	1.3	158980	48	-3.882	Amino Acids, Sulfur		1
myo-inositol	CDAISMWEOUEBRE-UHFFFAOYSA-N	892	C1(C(C(C(C(C1O)O)O)O)O)O	0.27	1.4	892	40	-1.458	Sugar Alcohols		1
N-acetylmannosamine	OVRNDRQMDRJTHS-ZTVVOAFPSA-N	439281	CC(=O)N[C@H]1[C@H]([C@@H]([C@H](OC1O)CO)O)O	0.53	1.1	439281	18	-1.488	Hexosamines		1
N-methylalanine	GDFAOVXKHJXLEI-VKHMYHEASA-N	5288725	C[C@@H](C(=O)O)NC	0.73	0.92	5288725	50	-0.268	Amino Acids	a	1
nornicotine	MYKUKUCHPMASKF-UHFFFAOYSA-N	412	C1CC(NC1)C2=CN=CC=C2	0.35	1.2	412	21	0.035	Pyridines		1
octadecanol	GLDOVTGHNKAZLK-UHFFFAOYSA-N	8221	CCCCCCCCCCCCCCCCCCO	0.34	1.2	8221	47	8.817	Fatty Alcohols		1
octanol NIST	KBPLFHHGFOOTCA-UHFFFAOYSA-N	957	CCCCCCCCO	0.25	0.79	957	47	3.127	Octanols		1
oleamide NIST	FATBGEAMYMYZAF-KTKRTIGZSA-N	5283387	CCCCCCCC/C=C\CCCCCCCC(=O)N	0.12	0.8	5283387	12	7.464	Oleic Acids		1
oleic acid	ZQPPMHVWECSIRJ-KTKRTIGZSA-N	445639	CCCCCCCC/C=C\CCCCCCCC(=O)O	0.1	0.77	445639	15	8.192	UnSaturated FA		1
ornithine	AHLPHDHHMVZTML-BYPYZUCNSA-N	6262	C(C[C@@H](C(=O)O)N)CN	0.44	0.87	6262	23	-3.307	Amino Acids, Basic		1
oxoproline	ODHCTXKNWHHXJC-VKHMYHEASA-N	7405	C1CC(=O)N[C@@H]1C(=O)O	0.079	0.6	7405	18	-0.827	Amino Acids, Cyclic		1
palmitic acid	IPCSVZSSVZVIGE-UHFFFAOYSA-N	985	CCCCCCCCCCCCCCCC(=O)O	0.095	0.55	985	4	7.57	Saturated FA		1
palmitoleic acid	SECPZKHBENQXJG-FPLPWBNLSA-N	445638	CCCCCC/C=C\CCCCCCCC(=O)O	0.27	0.94	445638	15	7.054	UnSaturated FA		1
pelargonic acid	FBUKVWPVBMHYJY-UHFFFAOYSA-N	8158	CCCCCCCCC(=O)O	0.038	0.6	8158	4	3.587	Saturated FA		1
phenylalanine	COLNVLDHVKWLRT-QMMMGPOBSA-N	6140	C1=CC=C(C=C1)C[C@@H](C(=O)O)N	0.47	1.3	6140	26	-1.575	Amino Acids, Aromatic		1
phenylethylamine	BHHGXPLMPWCGHP-UHFFFAOYSA-N	1001	C1=CC=C(C=C1)CCN	0.053	0.82	1001	26	1.106	Phenethylamines		1
phosphate	NBIIXXVUZAFLBC-UHFFFAOYSA-N	1004	OP(=O)(O)O	0.42	0.89	1004	54	-2.247	Polymers		1
phosphoethanolamine	SUHOOTKUPISOBE-UHFFFAOYSA-N	1015	C(COP(=O)(O)O)N	0.12	0.8	1015	42	-2.504	Ethanolamines		1
pipecolinic acid	HXEACLLIILLPRG-RXMQYKEDSA-N	736316	C1CCN[C@H](C1)C(=O)O	0.36	0.87	736316	18	0.173	Pipecolic Acids		1
piperidone	XUWHAWMETYGRKB-UHFFFAOYSA-N	12665	C1CCNC(=O)C1	0.38	0.93	12665	52	0.046	Piperidones		1
proline	ONIBWKKTOPOVIA-BYPYZUCNSA-N	145742	C1C[C@H](NC1)C(=O)O	0.13	1.5	145742	18	-0.185	Amino Acids, Cyclic		1
propane-1,3-diol NIST	YPFDHNVEDLHUCE-UHFFFAOYSA-N	10442	C(CO)CO	0.76	1.1	10442	27	-0.85	Glycols	c	1
pseudo-uridine	PTJWIQPHWPFNBW-GBNDHIKLSA-N	15047	C1=C(C(=O)NC(=O)N1)[C@H]2[C@@H]([C@@H]([C@H](O2)CO)O)O	0.025	2.3	15047	28	-2.477	Uridine		1
pyruvic acid	LCTONWCANYUPML-UHFFFAOYSA-N	1060	CC(=O)C(=O)O	0.13	1.1	1060	37	-0.426	Keto Acids		1
ribitol	HEBKCHPVOIAQTA-ZXFHETKHSA-N	827	C(C(C(C(CO)O)O)O)O	0.14	1.1	827	19	-3.224	Sugar Alcohols		1
ribonic acid	QXKAIJAYHKCRRA-BXXZVTAOSA-N	5460677	C([C@H]([C@H]([C@H](C(=O)O)O)O)O)O	0.16	0.76	5460677	49	-3.067	Glutarates		1
ribose	HMFHBZSHGGEWLO-SOOFDHNKSA-N	5779	C([C@@H]1[C@H]([C@H](C(O1)O)O)O)O	0.32	1.1	5779	35	-1.454	Pentoses		1
salicylaldehyde	SMQUZDBALVYZAC-UHFFFAOYSA-N	6998	C1=CC=C(C(=C1)C=O)O	0.064	1.2	6998	17	0.989	Aldehydes		1
salicylic acid	YGSDEFSMJLZEOE-UHFFFAOYSA-N	338	C1=CC=C(C(=C1)C(=O)O)O	0.2	0.81	338	17	0.908	Salicylates		1
serine	MTCFGRXMJLQNBG-REOHCLBHSA-N	5951	C([C@@H](C(=O)O)N)O	0.2	0.67	5951	39	-3.956	Amino Acids		1
stearic acid	QIQXTHQIDYTFRH-UHFFFAOYSA-N	5281	CCCCCCCCCCCCCCCCCC(=O)O	0.13	0.57	5281	4	8.708	Saturated FA		1
succinic acid	KDYFGRWQOYBRFD-UHFFFAOYSA-N	1110	C(CC(=O)O)C(=O)O	0.25	0.79	1110	41	-0.71	Dicarboxylic Acids		1
sucrose	CZMRCDWAGMRECN-UGDNZRGBSA-N	5988	C([C@@H]1[C@H]([C@@H]([C@H]([C@H](O1)O[C@]2([C@H]([C@@H]([C@H](O2)CO)O)O)CO)O)O)O)O	0.38	1.1	5988	31	-3.277	Disaccharides		1
tagatose	LKDRXBCSQODPBY-OEXCPVAWSA-N	439312	C1[C@H]([C@@H]([C@@H](C(O1)(CO)O)O)O)O	0.31	0.92	439312	14	-1.74	Hexoses		1
taurine	XOAAWQZATWQOTB-UHFFFAOYSA-N	1123	C(CS(=O)(=O)O)N	0.55	0.94	1123	38	-1.678	Alkanesulfonic Acids		1
threitol	UNXHWFMMPAWVPI-QWWZWVQMSA-N	169019	C([C@H]([C@@H](CO)O)O)O	0.31	1.1	169019	43	-2.552	Sugar Alcohols		1
threonic acid	JPIJQSOTBSSVTP-STHAYSLISA-N	5460407	C([C@@H]([C@H](C(=O)O)O)O)O	0.016	1.7	5460407	5	-2.395	Butyrates		1
threonine	AYFVYJQAPQTCCC-GBXIJSLDSA-N	6288	C[C@H]([C@@H](C(=O)O)N)O	0.27	1.4	6288	39	-3.496	Amino Acids		1
tocopherol alpha-	NCYCYZXNIZJOKI-OVSJKPMPSA-N	638015	CC1=C(C(CCC1)(C)C)/C=C/C(=C/C=C/C(=C/C=O)/C)/C	0.45	1.2	638015	9	6.335	Retinoids		1
tocopherol gamma-	QUEDXNHFTDJVIY-DQCZWYHMSA-N	92729	CC1=C(C=C2CC[C@@](OC2=C1C)(C)CCC[C@H](C)CCC[C@H](C)CCCC(C)C)O	0.26	0.87	92729	17	10.514	Tocopherols		1
trans-4-hydroxyproline	PMMYEEVYMWASQN-DMTCNVIQSA-N	5810	C1[C@H](CN[C@@H]1C(=O)O)O	0.072	0.59	5810	18	-0.786	Amino Acids, Cyclic		1
tryptophan	QIVBCDIJIAJPQS-VIFPVBQESA-N	6305	C1=CC=C2C(=C1)C(=CN2)C[C@@H](C(=O)O)N	0.09	1.8	6305	21	-2.023	Amino Acids, Aromatic		1
tyrosine	OUYCCCASQSFEME-QMMMGPOBSA-N	6057	C1=CC(=CC=C1C[C@@H](C(=O)O)N)O	0.16	1.6	6057	26	-2.711	Amino Acids, Aromatic		1
uracil	ISAKRJDGNUQOIC-UHFFFAOYSA-N	1174	C1=CNC(=O)NC1=O	0.12	1.3	1174	36	-0.875	Pyrimidinones		1
urea	XSQUKJJJFZCRTK-UHFFFAOYSA-N	1176	C(=O)(N)N	0.34	1.1	1176	55	-1.686	Organic Chemicals		1
uric acid	LEHOTFFKMJEONL-UHFFFAOYSA-N	1175	C12=C(NC(=O)N1)NC(=O)NC2=O	0.038	1.4	1175	36	-1.191	Xanthines		1
uridine	DRTQHJPVMGBUCF-XVFCMESISA-N	6029	C1=CN(C(=O)NC1=O)[C@H]2[C@@H]([C@@H]([C@H](O2)CO)O)O	0.0093	1.6	6029	28	-2.117	Pyrimidine Nucleosides		1
valine	KZSNJWFQEVHDMF-BYPYZUCNSA-N	6287	CC(C)[C@@H](C(=O)O)N	0.35	1.4	6287	34	-2.169	Amino Acids, Branched-Chain		1
xanthine	LRFVTYWOQMYALW-UHFFFAOYSA-N	1188	C1=NC2=C(N1)C(=O)NC(=O)N2	0.044	1.5	1188	36	-0.654	Xanthines		1
xylitol	HEBKCHPVOIAQTA-NGQZWQHPSA-N	6912	C([C@H](C([C@H](CO)O)O)O)O	0.2	0.79	6912	19	-3.224	Sugar Alcohols		1
xylose	SRBFZHDQGSBBOR-IOVATXLUSA-N	135191	C1[C@H]([C@@H]([C@H](C(O1)O)O)O)O	0.21	1.3	135191	14	-1.454	Pentoses		1
xylulose NIST	LQXVFWRQNMEDEE-PYHARJCCSA-N	439205	C1[C@@H]([C@H](C(O1)(CO)O)O)O	0.16	0.82	439205	35	-1.497	Pentoses		1
CE18:1	RJECHNNFRHZQKU-RMUVNZEASA-N	5283632	CCCCCCCC/C=C\CCCCCCCC(=O)O[C@H]1CC[C@@]2([C@H]3CC[C@]4([C@H]([C@@H]3CC=C2C1)CC[C@@H]4[C@H](C)CCCC(C)C)C)C	0.26	1.4	5283632	9	19.53	Cholesterol Esters		1
CE18:2	NAACPBBQTFFYQB-LJAITQKLSA-N	5287939	CCCCC/C=C\C/C=C\CCCCCCCC(=O)O[C@H]1CC[C@@]2([C@H]3CC[C@]4([C@H]([C@@H]3CC=C2C1)CC[C@@H]4[C@H](C)CCCC(C)C)C)C	0.48	1.3	5287939	9	19.203	Cholesterol Esters		1
CE18:3	FYMCIBHUFSIWCE-WVXFKAQASA-N	6436907	CC/C=C\C/C=C\C/C=C\CCCCCCCC(=O)O[C@H]1CC[C@@]2([C@H]3CC[C@]4([C@H]([C@@H]3CC=C2C1)CC[C@@H]4[C@H](C)CCCC(C)C)C)C	0.49	1.2	6436907	9	18.876	Cholesterol Esters		1
CE20:4	IMXSFYNMSOULQS-BEDFLICRSA-N	6479222	CCCCC/C=C\C/C=C\C/C=C\C/C=C\CCCC(=O)O[C@H]1CC[C@@]2([C@H]3CC[C@]4([C@H]([C@@H]3CC=C2C1)CC[C@@H]4[C@H](C)CCCC(C)C)C)C	0.024	1.7	6479222	9	19.687	Cholesterol Esters		1
CE22:6	VOEVEGPMRIYYKC-HNJOWPRISA-N	14274978	CC/C=C\C/C=C\C/C=C\C/C=C\C/C=C\C/C=C\CCC(=O)O[C@H]1CC[C@@]2([C@H]3CC[C@]4([C@H]([C@@H]3CC=C2C1)CC[C@@H]4[C@H](C)CCCC(C)C)C)C	0.069	1.5	14274978	9	20.171	Cholesterol Esters		1
Cer(d18:1/16:0)	YDNKGFDKKRUKPY-TURZORIXSA-N	5283564	CCCCCCCCCCCCCCCC(=O)N[C@@H](CO)[C@@H](/C=C/CCCCCCCCCCCCC)O	0.39	1.4	5283564	12	13.944	Ceramides		1
Cer(d18:1/22:0)	KEPQASGDXIEOIL-GLQCRSEXSA-N	5283567	CCCCCCCCCCCCCCCCCCCCCC(=O)N[C@@H](CO)[C@@H](/C=C/CCCCCCCCCCCCC)O	0.13	0.55	5283567	12	17.358	Ceramides		1
Cer(d18:1/24:1)	VJSBNBBOSZJDKB-KPEYJIHVSA-N	5283568	CCCCCCCCCCCCC/C=C/[C@H]([C@H](CO)NC(=O)CCCCCCCCCCCCC/C=C\CCCCCCCC)O	0.59	0.84	5283568	12	17.98	Ceramides		1
Ceramided18:1/23:0	NAJHAHQNQCNWOP-PUYNVXOJSA-N	52931115	CCCCCCCCCCCCCCCCCCCCCCC(=O)N[C@@H](CO)[C@@H](/C=C/CCCCCCCCCCCCC)O	0.1	0.62	52931115	12	17.927	Ceramides		1
Ceramided42:1	ZJVVOYPTFQEGPH-AUTSUKAISA-N	5283571	CCCCCCCCCCCCCCCCCCCCCCCC(=O)N[C@@H](CO)[C@@H](/C=C/CCCCCCCCCCCCC)O	0.14	0.6	5283571	12	18.496	Ceramides		1
DG32:0	JEJLGIQLPYYGEE-XIFFEERXSA-N	644078	CCCCCCCCCCCCCCCC(=O)OC[C@H](CO)OC(=O)CCCCCCCCCCCCCCC	0.42	0.87	644078	13	14.9	Saturated_Diglycerides		1
DG34:0	VYQDALBEQRZDPL-DHUJRADRSA-N	3246945	CCCCCCCCCCCCCCCCCC(=O)OC[C@H](CO)OC(=O)CCCCCCCCCCCCCCC	0.32	0.85	3246945	13	16.038	Saturated_Diglycerides		1
DG34:1	YEJYLHKQOBOSCP-OZKTZCCCSA-N	5282283	CCCCCCCCCCCCCCCC(=O)OC[C@H](CO)OC(=O)CCCCCCC/C=C\CCCCCCCC	0.34	1.2	5282283	10	15.522	Unsaturated_Diglycerides		1
DG36:0	UHUSDOQQWJGJQS-UHFFFAOYSA-N	102615	CCCCCCCCCCCCCCCCCC(=O)OCC(CO)OC(=O)CCCCCCCCCCCCCCCCC	0.44	0.83	102615	13	17.176	Saturated_Diglycerides		1
DG36:2	AFSHUZFNMVJNKX-LLWMBOQKSA-N	9543716	CCCCCCCC/C=C\CCCCCCCC(=O)OC[C@H](CO)OC(=O)CCCCCCC/C=C\CCCCCCCC	0.29	1.2	9543716	10	16.144	Unsaturated_Diglycerides		1
DG36:3	BLZVZPYMHLXLHG-JOBMVARSSA-N	9543722	CCCCCCCC/C=C\CCCCCCCC(=O)OC[C@H](CO)OC(=O)CCCCCCC/C=C\C/C=C\CCCCC	0.24	0.83	9543722	10	15.817	Unsaturated_Diglycerides		1
DG38:5	GRGDLDNREYVILP-CNWVQWJYSA-N	9543784	CCCCC/C=C\C/C=C\CCCCCCCCCC(=O)O[C@@H](CO)COC(=O)CCCCCCC/C=C\C/C=C\C/C=C\CC	0.67	0.94	9543784	10	16.301	Unsaturated_Diglycerides		1
DG38:6	YDVDXUYJFQLPEG-CTHJWPIASA-N	9543795	CCCCC/C=C\C/C=C\C/C=C\CCCCCCC(=O)O[C@@H](CO)COC(=O)CCCCCCC/C=C\C/C=C\C/C=C\CC	0.38	0.88	9543795	10	15.974	Unsaturated_Diglycerides		1
DG40:1	VFUWCRMMTRWZAT-JLDYGAOKSA-N	9543793	CCCCCCCCCCCCCCCCCCCC(=O)OC[C@H](CO)OC(=O)CCCCCCCCC/C=C\CCCCCCCC	0.51	0.77	9543793	10	18.936	Unsaturated_Diglycerides		1
FA22:4	TWSWSIQAPQLDBP-DOFZRALJSA-N	5497181	CCCCC/C=C\C/C=C\C/C=C\C/C=C\CCCCCC(=O)O	0.74	0.93	5497181	15	9.487	UnSaturated FA		1
GlcCerd18:1/22:0	YIGARKIIFOHVPF-YAEABVQUSA-N	6321359	CCCCCCCCCCCCCCCCCCCCCC(=O)N[C@@H](CO[C@H]1C(C([C@@H]([C@H](O1)CO)O)O)O)[C@@H](/C=C/CCCCCCCCCCCCC)O	0.14	0.67	6321359	32	16.25	Galactosylceramides		1
GlcCerd18:1/24:0	POQRWMRXUOPCLD-AAAFHMTMSA-N	6321361	CCCCCCCCCCCCCCCCCCCCCCCC(=O)N[C@@H](CO[C@H]1C(C([C@@H]([C@H](O1)CO)O)O)O)[C@@H](/C=C/CCCCCCCCCCCCC)O	0.021	0.46	6321361	32	17.388	Galactosylceramides		1
GlcCerd18:1/24:1	WBOZIXHPUPAOIA-RBELZSLISA-N	6321360	CCCCCCCCCCCCC/C=C/[C@H]([C@H](CO[C@H]1C(C([C@@H]([C@H](O1)CO)O)O)O)NC(=O)CCCCCCCCCCCCC/C=C\CCCCCCCC)O	0.31	0.75	6321360	32	16.872	Galactosylceramides		1
LPC18:0	IHNKQIMGVNPMTC-RUZDIDTESA-N	497299	CCCCCCCCCCCCCCCCCC(=O)OC[C@H](COP(=O)([O-])OCC[N+](C)(C)C)O	0.35	1.2	497299	44	6.6	Lysophosphatidylcholines		1
LPC18:1	YAMUFBLWGFFICM-PTGWMXDISA-N	16081932	CCCCCCCC/C=C\CCCCCCCC(=O)OC[C@H](COP(=O)([O-])OCC[N+](C)(C)C)O	0.19	0.73	16081932	20	6.084	Lysophosphatidylcholines		1
LPC18:2	SPJFYYJXNPEZDW-FTJOPAKQSA-N	11005824	CCCCC/C=C\C/C=C\CCCCCCCC(=O)OC[C@H](COP(=O)([O-])OCC[N+](C)(C)C)O	0.047	0.65	11005824	20	5.757	Lysophosphatidylcholines		1
LPC20:0	UATOAILWGVYRQS-HHHXNRCGSA-N	24779473	CCCCCCCCCCCCCCCCCCCC(=O)OC[C@H](COP(=O)([O-])OCC[N+](C)(C)C)O	0.29	0.76	24779473	44	7.738	Lysophosphatidylcholines		1
LPC20:1	GJTDRNFWIDPARY-GTPZACKGSA-N	24779475	CCCCCCCCCC/C=C\CCCCCCCC(=O)OC[C@H](COP(=O)([O-])OCC[N+](C)(C)C)O	0.16	1.4	24779475	20	7.222	Lysophosphatidylcholines		1
LPC20:2	YYQVCMMXPIJVHY-ZOIJLGJPSA-N	52924053	CCCCC/C=C\C/C=C\CCCCCCCCCC(=O)OC[C@H](COP(=O)([O-])OCC[N+](C)(C)C)O	0.25	0.74	52924053	20	6.895	Lysophosphatidylcholines		1
LPE18:0	BBYWOYAFBUOUFP-JOCHJYFZSA-N	46891690	CCCCCCCCCCCCCCCCCC(=O)OC[C@H](COP(=O)([O-])OCC[NH3+])O	0.17	1.3	46891690	45	6.696	Lysophospholipids		1
LPE18:2	DBHKHNGBVGWQJE-USWSLJGRSA-N	52925130	CCCCC/C=C\C/C=C\CCCCCCCC(=O)OC[C@H](COP(=O)(O)OCCN)O	0.0067	0.59	52925130	46	5.319	Phosphatidylethanolamines		1
LPE20:0	HEQMDGOBDIGJOC-XMMPIXPASA-N	52925131	CCCCCCCCCCCCCCCCCCCC(=O)OC[C@H](COP(=O)(O)OCCN)O	0.49	0.42	52925131	45	7.3	Lysophospholipids		1
LPE20:1	JEAGLCKGAKACCE-OPSAWKISSA-N	52925139	CCCCCCCC/C=C\CCCCCCCCCC(=O)OC[C@H](COP(=O)(O)OCCN)O	0.24	0.75	52925139	46	6.784	Phosphatidylethanolamines		1
PC16:0/16:0	KILNVBDSWZSGLL-KXQOOQHDSA-N	452110	CCCCCCCCCCCCCCCC(=O)OC[C@H](COP(=O)([O-])OCC[N+](C)(C)C)OC(=O)CCCCCCCCCCCCCCC	0.2	0.67	452110	16	13.852	Saturated_Phosphatidylcholines		1
PC18:1/16:0	WTJKGGKOPKCXLL-VYOBOKEXSA-N	5497103	CCCCCCCCCCCCCCCC(=O)OC[C@H](COP(=O)([O-])OCC[N+](C)(C)C)OC(=O)CCCCCCC/C=C\CCCCCCCC	0.36	0.59	5497103	2	14.474	Unsaturated_Phosphatidylcholines		1
PC28:0	CITHEXJVPOWHKC-UUWRZZSWSA-N	5459377	CCCCCCCCCCCCCC(=O)OC[C@H](COP(=O)([O-])OCC[N+](C)(C)C)OC(=O)CCCCCCCCCCCCC	0.06	0.75	5459377	16	11.576	Saturated_Phosphatidylcholines		1
PC30:0	RFVFQQWKPSOBED-PSXMRANNSA-N	129657	CCCCCCCCCCCCCCCC(=O)O[C@H](COC(=O)CCCCCCCCCCCCC)COP(=O)([O-])OCC[N+](C)(C)C	0.05	0.62	129657	16	12.714	Saturated_Phosphatidylcholines		1
PC32:1	QIBZFHLFHCIUOT-NPBIGWJUSA-N	6443788	CCCCCCCCCCCCCCCC(=O)OC[C@H](COP(=O)([O-])OCC[N+](C)(C)C)OC(=O)CCCCCCC/C=C\CCCCCC	0.025	0.57	6443788	2	13.336	Unsaturated_Phosphatidylcholines		1
PC32:2	GPWHCUUIQMGELX-VHQDNGOZSA-N	24778764	CCCCCC/C=C\CCCCCCCC(=O)OC[C@H](COP(=O)([O-])OCC[N+](C)(C)C)OC(=O)CCCCCCC/C=C\CCCCCC	0.044	0.69	24778764	2	12.82	Unsaturated_Phosphatidylcholines		1
PC32:3	UXEFXNOSLOCOLX-ZCHSEWAGSA-N	52922763	CCCCCCCCCCCCCC(=O)O[C@H](COC(=O)CCCC/C=C\C/C=C\C/C=C\CCCCC)COP(=O)([O-])OCC[N+](C)(C)C	0.1	0.66	52922763	2	12.682	Unsaturated_Phosphatidylcholines		1
PC33:1	GXTATYLPYLLNLV-MGIDVFSBSA-N	24778662	CCCCCCCCCCCCCCC(=O)OC[C@H](COP(=O)([O-])OCC[N+](C)(C)C)OC(=O)CCCCCCCCC/C=C\CCCCCC	0.25	0.77	24778662	2	13.905	Unsaturated_Phosphatidylcholines		1
PC34:0	PZNPLUBHRSSFHT-RRHRGVEJSA-N	24778686	CCCCCCCCCCCCCCCCCC(=O)O[C@H](COC(=O)CCCCCCCCCCCCCCC)COP(=O)([O-])OCC[N+](C)(C)C	0.41	0.87	24778686	16	14.99	Saturated_Phosphatidylcholines		1
PC34:2	JLPULHDHAOZNQI-ZTIMHPMXSA-N	5287971	CCCCCCCCCCCCCCCC(=O)OC[C@H](COP(=O)([O-])OCC[N+](C)(C)C)OC(=O)CCCCCCC/C=C\C/C=C\CCCCC	0.08	0.23	5287971	2	14.147	Unsaturated_Phosphatidylcholines		1
PC34:3	CNNSEHUKQJCGTE-UPPWDXJYSA-N	24778699	CCCCCCCCCCCCCCCC(=O)OC[C@H](COP(=O)([O-])OCC[N+](C)(C)C)OC(=O)CCCC/C=C\C/C=C\C/C=C\CCCCC	0.056	0.58	24778699	2	13.82	Unsaturated_Phosphatidylcholines		1
PC35:2	ZSKWZJYUVZYDQU-WESJWMGVSA-N	52922491	CCCCCCCCCCCCCCCCC(=O)OC[C@H](COP(=O)([O-])OCC[N+](C)(C)C)OC(=O)CCCCCCC/C=C\C/C=C\CCCCC	0.11	0.63	52922491	2	14.716	Unsaturated_Phosphatidylcholines		1
PC36:0	NRJAVPSFFCBXDT-HUESYALOSA-N	94190	CCCCCCCCCCCCCCCCCC(=O)OC[C@H](COP(=O)([O-])OCC[N+](C)(C)C)OC(=O)CCCCCCCCCCCCCCCCC	0.84	1	94190	16	16.128	Saturated_Phosphatidylcholines		1
PC36:1	ATHVAWFAEPLPPQ-VRDBWYNSSA-N	24778825	CCCCCCCCCCCCCCCCCC(=O)OC[C@H](COP(=O)([O-])OCC[N+](C)(C)C)OC(=O)CCCCCCC/C=C\CCCCCCCC	0.056	0.56	24778825	2	15.612	Unsaturated_Phosphatidylcholines		1
PC36:2	SNKAWJBJQDLSFF-NVKMUCNASA-N	10350317	CCCCCCCC/C=C\CCCCCCCC(=O)OC[C@H](COP(=O)([O-])OCC[N+](C)(C)C)OC(=O)CCCCCCC/C=C\CCCCCCCC	0.14	0.39	10350317	2	15.096	Unsaturated_Phosphatidylcholines		1
PC36:3	BXRLDROZWDUSGM-ZRYFCQOPSA-N	24778937	CCCCCCCC/C=C\CCCCCCCC(=O)OC[C@H](COP(=O)([O-])OCC[N+](C)(C)C)OC(=O)CCCC/C=C\C/C=C\CCCCCCCC	0.08	0.48	24778937	2	14.769	Unsaturated_Phosphatidylcholines		1
PC36:4	IIZPXYDJLKNOIY-JXPKJXOSSA-N	10747814	CCCCCCCCCCCCCCCC(=O)OC[C@H](COP(=O)([O-])OCC[N+](C)(C)C)OC(=O)CCC/C=C\C/C=C\C/C=C\C/C=C\CCCCC	0.084	0.53	10747814	2	14.631	Unsaturated_Phosphatidylcholines		1
PC36:5	DYDDZDMJSQYFGN-OIVUZXIWSA-N	24778771	CCCCCC/C=C\CCCCCCCC(=O)OC[C@H](COP(=O)([O-])OCC[N+](C)(C)C)OC(=O)CCC/C=C\C/C=C\C/C=C\C/C=C\CCCCC	0.46	3	24778771	2	14.115	Unsaturated_Phosphatidylcholines		1
PC36:6	SPWBDEZMKCRQSX-NGPPOSSDSA-N	52922847	CCCCC/C=C\C/C=C\C/C=C\CCCCC(=O)O[C@H](COC(=O)CCCCCCC/C=C\C/C=C\C/C=C\CC)COP(=O)([O-])OCC[N+](C)(C)C	0.52	0.89	52922847	2	13.788	Unsaturated_Phosphatidylcholines		1
PC37:2	MCZUABDVGPPWPM-HJTCUGKVSA-N	52922735	CCCCCCCCCCCCCCCCCCC(=O)O[C@H](COC(=O)CCCCCCC/C=C\C/C=C\CCCCC)COP(=O)([O-])OCC[N+](C)(C)C	0.058	0.58	52922735	2	15.854	Unsaturated_Phosphatidylcholines		1
PC37:3	OOYQEEUUQRMQKL-JUUDQZDJSA-N	52922851	CCCCCCCCCCCCCCCCCCC(=O)O[C@H](COC(=O)CCCCCCC/C=C\C/C=C\C/C=C\CC)COP(=O)([O-])OCC[N+](C)(C)C	0.27	0.72	52922851	2	15.527	Unsaturated_Phosphatidylcholines		1
PC37:4	QRPUCJXFPYFTMB-FBFLODOBSA-N	52922853	CCCCCCCCC/C=C\CCCCCCCC(=O)O[C@H](COC(=O)CCCCCCC/C=C\C/C=C\C/C=C\CC)COP(=O)([O-])OCC[N+](C)(C)C	0.61	0.88	52922853	2	15.011	Unsaturated_Phosphatidylcholines		1
PC38:2	KXXLFCAPKGRXBT-FMJYHZMHSA-N	24779263	CCCCCCCCCCCCCCCCCCCC(=O)OC[C@H](COP(=O)([O-])OCC[N+](C)(C)C)OC(=O)CCCCCCC/C=C\C/C=C\CCCCC	0.76	0.93	24779263	2	16.423	Unsaturated_Phosphatidylcholines		1
PC38:3	OJHJKEBRZSDTTL-VHWCKNCUSA-N	52922741	CCCCCCCC/C=C\CCCCCCCCCC(=O)O[C@H](COC(=O)CCCCCCC/C=C\C/C=C\CCCCC)COP(=O)([O-])OCC[N+](C)(C)C	0.43	0.89	52922741	2	15.907	Unsaturated_Phosphatidylcholines		1
PC38:4	DNYKSJQVBCVGOF-LCKGXUDJSA-N	52923291	CCCCCCCCCCCCCCCCCC(=O)O[C@H](COC(=O)CCC/C=C\C/C=C\C/C=C\C/C=C\CCCCC)COP(=O)([O-])OCC[N+](C)(C)C	0.4	1.2	52923291	2	15.769	Unsaturated_Phosphatidylcholines		1
PC38:5	YLWBKBDNHWQEFU-YJXJLLHLSA-N	53479033	CCCCCC/C=C\CCCCCCCCCC(=O)O[C@H](COC(=O)CCC/C=C\C/C=C\C/C=C\C/C=C\CCCCC)COP(=O)([O-])OCC[N+](C)(C)C	0.47	0.84	53479033	2	15.253	Unsaturated_Phosphatidylcholines		1
PC38:6	PLZBTDKJYHXIEW-DZUXOTHRSA-N	52923295	CCCCC/C=C\C/C=C\CCCCCCCC(=O)O[C@H](COC(=O)CCC/C=C\C/C=C\C/C=C\C/C=C\CCCCC)COP(=O)([O-])OCC[N+](C)(C)C	0.56	0.94	52923295	2	14.926	Unsaturated_Phosphatidylcholines		1
PC38:8	QQNHCRBGLPDWEW-LRFGEVPTSA-N	52922865	CC/C=C\C/C=C\C/C=C\CCCCCCCC(=O)OC[C@H](COP(=O)([O-])OCC[N+](C)(C)C)OC(=O)CCC/C=C\C/C=C\C/C=C\C/C=C\C/C=C\CC	0.4	0.93	52922865	2	14.272	Unsaturated_Phosphatidylcholines		1
PC40:2	AEUCYCQYAUFAKH-DITNKEBASA-N	24779063	CCCCCCCC/C=C\CCCCCCCCCC(=O)OC[C@H](COP(=O)([O-])OCC[N+](C)(C)C)OC(=O)CCCCCCCCC/C=C\CCCCCCCC	0.36	0.78	24779063	2	17.372	Unsaturated_Phosphatidylcholines		1
PC40:5	LJFKFKIYUJNFPZ-ZLFSCUDPSA-N	52923133	CCCCCCCC/C=C\CCCCCCCCCC(=O)OC[C@H](COP(=O)([O-])OCC[N+](C)(C)C)OC(=O)CCC/C=C\C/C=C\C/C=C\C/C=C\CCCCC	0.3	0.8	52923133	2	16.391	Unsaturated_Phosphatidylcholines		1
PC40:6	TYRTWVKQVGNGSZ-RGBTVBCDSA-N	52923195	CCCCC/C=C\C/C=C\CCCCCCCCCC(=O)OC[C@H](COP(=O)([O-])OCC[N+](C)(C)C)OC(=O)CCC/C=C\C/C=C\C/C=C\C/C=C\CCCCC	0.26	0.82	52923195	2	16.064	Unsaturated_Phosphatidylcholines		1
PC40:7	BPUROMFCPFGBOT-ZEGPSQTJSA-N	24778982	CCCCC/C=C\C/C=C\CCCCCCCC(=O)OC[C@H](COP(=O)([O-])OCC[N+](C)(C)C)OC(=O)CC/C=C\C/C=C\C/C=C\C/C=C\C/C=C\CCCCC	0.11	0.7	24778982	2	15.737	Unsaturated_Phosphatidylcholines		1
PC42:1	PAHPUCKPYBHMBM-RURDTVAGSA-N	24778881	CCCCCCCCCCCCCCCCCC(=O)OC[C@H](COP(=O)([O-])OCC[N+](C)(C)C)OC(=O)CCCCCCCCCCCCC/C=C\CCCCCCCC	0.066	1.8	24778881	2	19.026	Unsaturated_Phosphatidylcholines		1
PC42:4	SGYNBRXEOXADHS-CIUHTZMDSA-N	24779052	CCCCCCCCCCCCCCCCCCCC(=O)OC[C@H](COP(=O)([O-])OCC[N+](C)(C)C)OC(=O)CCCCC/C=C\C/C=C\C/C=C\C/C=C\C/C=C\CC	0.033	1.8	24779052	2	17.718	Unsaturated_Phosphatidylcholines		1
PC42:6	DSVRMAGYENFTLY-GDDYDVMSSA-N	52923651	CCCCC/C=C\C/C=C\CCCCCCCCCC(=O)O[C@H](COC(=O)CCCCC/C=C\C/C=C\C/C=C\C/C=C\CCCCC)COP(=O)([O-])OCC[N+](C)(C)C	0.8	0.94	52923651	2	17.202	Unsaturated_Phosphatidylcholines		1
PC44:3	GZZUNXHFXFGEBB-MXZPZXETSA-N	52923541	CCCCCCCCCC/C=C\CCCCCCCCCC(=O)OC[C@H](COP(=O)([O-])OCC[N+](C)(C)C)OC(=O)CCCCCCCCCCC/C=C\C/C=C\CCCCC	0.038	1.7	52923541	2	19.321	Unsaturated_Phosphatidylcholines		1
PC44:4	UIAAGLPOUUFIRG-ZUEQPGPOSA-N	52923481	CCCCCCCCCCCCCCCCCCCCCC(=O)OC[C@H](COP(=O)([O-])OCC[N+](C)(C)C)OC(=O)CCCCC/C=C\C/C=C\C/C=C\C/C=C\CCCCC	0.044	1.7	52923481	2	19.183	Unsaturated_Phosphatidylcholines		1
PCp34:1	OIICTMOQBYZCDA-IIKIFWEUSA-N	11125520	CCCCCCCCCCCCCCCC/C=C\OC[C@H](COP(=O)([O-])OCC[N+](C)(C)C)OC(=O)CCCCCCCCCCCCCCC	0.4	0.71	11125520	2	15.528	Plasmalogens		1
PCp34:2	KMNVIRCHUMQGHD-RCINKDPXSA-N	52923934	CCCCCCCCCCCCCCCC/C=C\OC[C@H](COP(=O)([O-])OCC[N+](C)(C)C)OC(=O)CCCCCCC/C=C\CCCCCC	0.53	0.8	52923934	2	15.012	Unsaturated_Phosphatidylcholines		1
PCp34:3	QLEHHUPUHJPURI-PWYDUFMYSA-N	24779386	CCCCCCCCCCCCCC/C=C\OC[C@H](COP(=O)([O-])OCC[N+](C)(C)C)OC(=O)CCCCCCC/C=C\C/C=C\CCCCC	0.043	0.54	24779386	2	14.685	Unsaturated_Phosphatidylcholines		1
PCp36:3	SOUZQPFUXRVDGK-KCTKZSJBSA-N	53481701	CCCCCCCCCCCCCCCCOC[C@H](COP(=O)([O-])OCC[N+](C)(C)C)OC(=O)CCCCCC/C=C\C/C=C\C/C=C\C/C=C\CC	0.26	0.65	53481701	2	14.938	Unsaturated_Phosphatidylcholines		1
PCp36:4	IOYKZPNDXIIXLN-LOQSCQKMSA-N	24779388	CCCCCCCCCCCCCC/C=C\OC[C@H](COP(=O)([O-])OCC[N+](C)(C)C)OC(=O)CCC/C=C\C/C=C\C/C=C\C/C=C\CCCCC	0.58	1.2	24779388	2	15.169	Unsaturated_Phosphatidylcholines		1
PE34:2	HBZNVZIRJWODIB-NHCUFCNUSA-N	46891780	CCCCCCCCCCCCCCCC(=O)OC[C@H](COP(=O)([O-])OCC[NH3+])OC(=O)CCCCCCC/C=C\C/C=C\CCCCC	0.01	0.57	46891780	7	14.243	Phosphatidylethanolamines		1
PE36:2	DXXUYBAISOHOLM-XRIXOMQFSA-N	52924894	CCCCCCCCCCCCCCCCCC(=O)O[C@H](COC(=O)CCCCCCC/C=C\C/C=C\CCCCC)COP(=O)(O)OCCN	0.0093	0.47	52924894	7	14.847	Phosphatidylethanolamines		1
PE36:3	GKAFCSRKMWFPSJ-RJXNKANHSA-N	71728379	CCCCCCCC/C=C\CCCCCCCC(=O)OC[C@H](COP(=O)([O-])OCC[NH3+])OC(=O)CCCCCCC/C=C\C/C=C\CCCCC	0.012	9.5	71728379	7	14.865	Phosphatidylethanolamines		1
PE36:4	DUQDVNACTOXOJA-KTKXOIIHSA-N	52924875	CCCCCCCCCCCCCCCC(=O)O[C@H](COC(=O)CCC/C=C\C/C=C\C/C=C\C/C=C\CCCCC)COP(=O)(O)OCCN	0.45	1.2	52924875	7	14.193	Phosphatidylethanolamines		1
PE38:2	CLPMAPXZURYSNH-CNBLIUODSA-N	9546825	CCCCCCCCCCCCCCCCCCCC(=O)OC[C@H](COP(=O)(O)OCCN)OC(=O)CCCCCCC/C=C\C/C=C\CCCCC	0.12	0.69	9546825	7	15.985	Phosphatidylethanolamines		1
PE38:4	ANRKEHNWXKCXDB-BHFWLYLHSA-N	46891781	CCCCCCCCCCCCCCCCCC(=O)OC[C@H](COP(=O)([O-])OCC[NH3+])OC(=O)CCC/C=C\C/C=C\C/C=C\C/C=C\CCCCC	0.26	0.83	46891781	7	15.865	Phosphatidylethanolamines		1
PE38:6	LFGBKOUQHCWBQI-BZGLIJSBSA-N	52924893	CCCCC/C=C\C/C=C\CCCCCCCC(=O)OC[C@H](COP(=O)(O)OCCN)OC(=O)CCC/C=C\C/C=C\C/C=C\C/C=C\CCCCC	0.62	1.1	52924893	7	14.488	Phosphatidylethanolamines		1
PE40:6	FEABWDMFZNBFCT-KUVQHVNNSA-N	52924379	CCCCC/C=C\C/C=C\CCCCCCCC(=O)OC[C@H](COP(=O)(O)OCCN)OC(=O)CCCCC/C=C\C/C=C\C/C=C\C/C=C\CCCCC	0.26	1.3	52924379	7	15.626	Phosphatidylethanolamines		1
Phosphatidylglycerol29:0	RYHJACYQTJIGMZ-JHOUSYSJSA-N	52926457	CCCCCCCCCCCCCCCC(=O)OC[C@H](COP(=O)(O)OC[C@H](CO)O)OC(=O)CCCCCCCCCCCC	0.18	0.52	52926457	13	11.102	Phosphatidylglycerols		1
Plasmenyl-PC34:2	IQACMFWAGALEAQ-WESJWMGVSA-N	6443157	CCCCCCCCCCCCCCCCOC[C@H](COP(=O)([O-])OCC[N+](C)(C)C)OC(=O)CCCCCCC/C=C\C/C=C\CCCCC	0.049	0.6	6443157	2	14.454	Unsaturated_Phosphatidylcholines		1
Plasmenyl-PC36:6	JCIBOIAZHLGPOT-YAYDGDQKSA-N	70698851	CCCCCC/C=C\CCCCCCCC/C=C\O[C@H](COC(=O)CCCC/C=C\C/C=C\C/C=C\C/C=C\CC)COP(=O)([O-])OCC[N+](C)(C)C	0.035	0.58	70698851	2	14.653	Unsaturated_Phosphatidylcholines		1
Plasmenyl-PC38:5	FHHVIBPVBBRLOR-IYACIECVSA-N	24779390	CCCCCCCCCCCCCCCC/C=C\OC[C@H](COP(=O)([O-])OCC[N+](C)(C)C)OC(=O)CCC/C=C\C/C=C\C/C=C\C/C=C\CCCCC	0.77	1.1	24779390	2	16.307	Unsaturated_Phosphatidylcholines		1
plasmenyl-PE36:3	XVXISDREVDGQPX-PISDLAQISA-N	52925079	CCCCCCCCCCCCCCCC/C=C\OC[C@H](COP(=O)(O)OCCN)OC(=O)CCCCCCC/C=C\C/C=C\CCCCC	0.41	1.2	52925079	33	15.385	Phosphatidylethanolamines		1
plasmenyl-PE36:5	UUYSKERSKRMYME-MAIXUNBTSA-N	52925126	CCCCCCCCCCCCCC/C=C\OC[C@H](COP(=O)(O)OCCN)OC(=O)CCC/C=C\C/C=C\C/C=C\C/C=C\CCCCC	0.21	1.3	52925126	11	14.731	Plasmalogens		1
plasmenyl-PE36:6	RLLOITCRNQRGJD-DFAKUSJGSA-N	52925061	CCCCCCCCCCCCCC/C=C\OC[C@H](COP(=O)(O)OCCN)OC(=O)CCC/C=C\C/C=C\C/C=C\C/C=C\C/C=C\CC	0.55	0.95	52925061	11	14.404	Plasmalogens		1
plasmenyl-PE38:5	URPXXNCTXCOATD-FXMFQVEGSA-N	86289532	CCCCCCCCCCCCCCCC/C=C\OC[C@H](COP(=O)([O-])OCC[NH3+])OC(=O)CCC/C=C\C/C=C\C/C=C\C/C=C\CCCCC	0.2	1.2	86289532	11	16.403	Plasmalogens		1
plasmenyl-PE38:6	KCNBSSYOJRUKOM-JALPNNRCSA-N	52925089	CCCCCCCCCCCCCCCC/C=C\OC[C@H](COP(=O)(O)OCCN)OC(=O)CCC/C=C\C/C=C\C/C=C\C/C=C\C/C=C\CC	0.15	1.3	52925089	11	15.542	Plasmalogens		1
plasmenyl-PE38:7	WVGALBKSWOUIEZ-XNHMFJFDSA-N	5283497	CCCCCCCCCCCCCC/C=C\OC[C@H](COP(=O)(O)OCCN)OC(=O)CC/C=C\C/C=C\C/C=C\C/C=C\C/C=C\C/C=C\CC	0.17	1.3	5283497	11	15.215	Plasmalogens		1
Plasmenyl-PE40:6	CVCZYWPCMUWTNS-IXKBFPPMSA-N	52925119	CCCCCCCCCCCCCCCCCC/C=C\OC[C@H](COP(=O)(O)OCCN)OC(=O)CCC/C=C\C/C=C\C/C=C\C/C=C\C/C=C\CC	0.39	1.2	52925119	11	16.68	Plasmalogens		1
plasmenyl-PE40:7	FIJFPUAJUDAZEY-MNDXXDKYSA-N	42607458	CCCCCCCCCCCCCCCC/C=C\OC[C@H](COP(=O)(O)OCCN)OC(=O)CC/C=C\C/C=C\C/C=C\C/C=C\C/C=C\C/C=C\CC	0.15	1.2	42607458	11	16.353	Plasmalogens		1
PS38:3	BQBTWCBZEKRLFP-BGFRNLFWSA-N	52925523	CCCCCCCCCCCCCCCCCCCC(=O)O[C@H](COC(=O)CCCCCCC/C=C\C/C=C\C/C=C\CC)COP(=O)(O)OC[C@@H](C(=O)O)N	0.48	0.58	52925523	6	12.977	Phosphatidylserines		1
PS38:4	SVOUGFFDROZBJI-DNALCEECSA-N	24779545	CCCCCCCCCCCCCCCCCC(=O)OC[C@H](COP(=O)(O)OC[C@@H](C(=O)O)N)OC(=O)CCC/C=C\C/C=C\C/C=C\C/C=C\CCCCC	0.29	5.8	24779545	6	12.65	Phosphatidylserines		1
PS40:3	BTIQFPURPAGQHS-HOSNKBABSA-N	52925502	CCCCCCCCCCCCCCCCCCCCCC(=O)O[C@H](COC(=O)CCCC/C=C\C/C=C\C/C=C\CCCCC)COP(=O)(O)OC[C@@H](C(=O)O)N	0.14	0.56	52925502	6	14.115	Phosphatidylserines		1
PS40:4	GBBNRADSWUALEU-AEDAHVLISA-N	52925748	CCCCCCCCCCCCCCCCCCCC(=O)O[C@H](COC(=O)CCC/C=C\C/C=C\C/C=C\C/C=C\CCCCC)COP(=O)(O)OC[C@@H](C(=O)O)N	0.33	0.3	52925748	6	13.788	Phosphatidylserines		1
PS40:6	LYYHRRPTEXPVOR-SYEOQEKUSA-N	24779546	CCCCCCCCCCCCCCCCCC(=O)OC[C@H](COP(=O)(O)OC[C@@H](C(=O)O)N)OC(=O)CC/C=C\C/C=C\C/C=C\C/C=C\C/C=C\C/C=C\CC	0.31	1.7	24779546	6	13.134	Phosphatidylserines		1
PS42:5	VNQACVFLMLYTLE-WDLXSBMRSA-N	52925755	CCCCCCCCCC/C=C\CCCCCCCCCC(=O)O[C@H](COC(=O)CCC/C=C\C/C=C\C/C=C\C/C=C\CCCCC)COP(=O)(O)OC[C@@H](C(=O)O)N	0.62	1.1	52925755	6	14.41	Phosphatidylserines		1
PS42:6	WOBFEYJLJCLDBR-NISVGTQTSA-N	52925756	CCCCC/C=C\C/C=C\CCCCCCCCCCCC(=O)O[C@H](COC(=O)CCC/C=C\C/C=C\C/C=C\C/C=C\CCCCC)COP(=O)(O)OC[C@@H](C(=O)O)N	0.36	1.3	52925756	6	14.083	Phosphatidylserines		1
PS42:8	ROCNHMAZFKRILY-PRDJOCNNSA-N	52925757	CCCCC/C=C\C/C=C\C/C=C\C/C=C\CCCCCC(=O)O[C@H](COC(=O)CCC/C=C\C/C=C\C/C=C\C/C=C\CCCCC)COP(=O)(O)OC[C@@H](C(=O)O)N	0.1	0.7	52925757	6	13.429	Phosphatidylserines		1
PSp34:0	OHPHIZCKAAJKOG-PBSRCHRYSA-N	52926194	CCCCCCCCCCCCCCCCCC(=O)O[C@H](CO/C=C\CCCCCCCCCCCCCC)COP(=O)(O)OC[C@@H](C(=O)O)N	0.37	1.2	52926194	6	12.409	Phosphatidylserines		1
SM(d18:1/18:0)	LKQLRGMMMAHREN-YJFXYUILSA-N	6453725	CCCCCCCCCCCCCCCCCC(=O)N[C@@H](COP(=O)([O-])OCC[N+](C)(C)C)[C@@H](/C=C/CCCCCCCCCCCCC)O	0.16	0.61	6453725	3	14.034	Unsaturated_Phosphatidylcholines		1
SM(d18:1/18:1)	NBEADXWAAWCCDG-QDDWGVBQSA-N	6443882	CCCCCCCCCCCCC/C=C/[C@H]([C@H](COP(=O)([O-])OCC[N+](C)(C)C)NC(=O)CCCCCCC/C=C\CCCCCCCC)O	0.33	1.2	6443882	3	13.518	Sphingomyelins		1
SM(d18:1/20:1)	MDRFMTLYKHBJTF-NQYLGBTJSA-N	52931179	CCCCCCCCCCCCC/C=C/[C@H]([C@H](COP(=O)([O-])OCC[N+](C)(C)C)NC(=O)CCCCCCCCC/C=C\CCCCCCCC)O	0.35	1.3	52931179	3	14.656	Sphingomyelins		1
SM(d18:2/24:1)	TXFLWJQVQCDUDZ-BRUGZULGSA-N	52931215	CCCCCCCC/C=C\CCCCCCCCCCCCCC(=O)N[C@@H](COP(=O)([O-])OCC[N+](C)(C)C)[C@@H](/C=C/CCCCCCCC/C=C\CCC)O	0.12	1.7	52931215	3	16.416	Sphingomyelins		1
SM33:1	LQINJRUGTUOHGS-YPDYIYJKSA-N	52931139	CCCCCCCCCCCCCCC(=O)N[C@@H](COP(=O)([O-])OCC[N+](C)(C)C)[C@@H](/C=C/CCCCCCCCCCCCC)O	0.22	0.74	52931139	3	12.327	Sphingomyelins		1
SM34:0	QHZIGNLCLJPLCU-QPPIDDCLSA-N	9939965	CCCCCCCCCCCCCCC[C@H]([C@H](COP(=O)([O-])OCC[N+](C)(C)C)NC(=O)CCCCCCCCCCCCCCC)O	0.15	0.53	9939965	3	13.146	Saturated_Phosphatidylcholines		1
SMd18:1/14:0	KYICBZWZQPCUMO-PSALXKTOSA-N	11433862	CCCCCCCCCCCCC/C=C/[C@H]([C@H](COP(=O)([O-])OCC[N+](C)(C)C)NC(=O)CCCCCCCCCCCCC)O	0.27	0.75	11433862	3	11.758	Sphingomyelins		1
SMd18:1/16:0	RWKUXQNLWDTSLO-GWQJGLRPSA-N	9939941	CCCCCCCCCCCCCCCC(=O)N[C@@H](COP(=O)([O-])OCC[N+](C)(C)C)[C@@H](/C=C/CCCCCCCCCCCCC)O	0.51	0.75	9939941	3	12.896	Sphingomyelins		1
SMd18:1/16:1	YLWSJLLZUHSIEA-CKSUKHGVSA-N	52931235	CCCCCCCCCCCCCCCC(=O)N[C@@H](COP(=O)([O-])OCC[N+](C)(C)C)[C@@H](/C=C/CCCCCCCC/C=C\CCC)O	0.42	1.3	52931235	3	12.38	Sphingomyelins		1
SMd18:1/20:0	AADLTHQNYQJHQV-SVLGDMRNSA-N	44260124	CCCCCCCCCCCCCCCCCCCC(=O)N[C@@H](COP(=O)([O-])OCC[N+](C)(C)C)[C@@H](/C=C/CCCCCCCCCCCCC)O	0.42	0.79	44260124	3	15.172	Sphingomyelins		1
SMd18:1/21:0	YXSZOBWVQJIWNE-QVDCKBILSA-N	52931193	CCCCCCCCCCCCCCCCCCCCC(=O)N[C@@H](COP(=O)([O-])OCC[N+](C)(C)C)[C@@H](/C=C/CCCCCCCCCCCCC)O	0.22	0.77	52931193	3	15.741	Sphingomyelins		1
SMd18:1/22:0	FJJANLYCZUNFSE-TWKUQIQBSA-N	44260125	CCCCCCCCCCCCCCCCCCCCCC(=O)N[C@@H](COP(=O)([O-])OCC[N+](C)(C)C)[C@@H](/C=C/CCCCCCCCCCCCC)O	0.12	1.7	44260125	3	16.31	Sphingomyelins		1
SMd18:1/23:0	SXZWBNWTCVLZJN-NMIJJABPSA-N	46891684	CCCCCCCCCCCCCCCCCCCCCCC(=O)N[C@@H](COP(=O)([O-])OCC[N+](C)(C)C)[C@@H](/C=C/CCCCCCCCCCCCC)O	0.22	1.4	46891684	3	16.879	Sphingomyelins		1
SMd18:1/24:0	QEDPUVGSSDPBMD-XTAIVQBESA-N	44260127	CCCCCCCCCCCCCCCCCCCCCCCC(=O)N[C@@H](COP(=O)([O-])OCC[N+](C)(C)C)[C@@H](/C=C/CCCCCCCCCCCCC)O	0.031	2	44260127	3	17.448	Sphingomyelins		1
SMd18:2/23:0	JBDGKEXQKCCQFK-JWQIMADESA-N	52931209	CCCCCCCCCCCCCCCCCCCCCCC(=O)N[C@@H](COP(=O)([O-])OCC[N+](C)(C)C)[C@@H](/C=C/CCCCCCCC/C=C\CCC)O	0.36	0.75	52931209	3	16.363	Sphingomyelins		1
SMd18:2/24:0	DACOGJMBYLZYDH-GXJPFUDISA-N	52931217	CCCCCCCCCCCCCCCCCCCCCCCC(=O)N[C@@H](COP(=O)([O-])OCC[N+](C)(C)C)[C@@H](/C=C/CCCCCCCC/C=C\CCC)O	0.42	1.3	52931217	3	16.932	Sphingomyelins		1
TG42:0	DUXYWXYOBMKGIN-UHFFFAOYSA-N	11148	CCCCCCCCCCCCCC(=O)OCC(COC(=O)CCCCCCCCCCCCC)OC(=O)CCCCCCCCCCCCC	0.069	0.87	11148	8	19.876	Saturated_Triglycerides		1
TG44:1	UZLGGKDLJGDGEY-WVSHCNQOSA-N	56936554	CCCCCCCCCCCCCC(=O)OC[C@H](COC(=O)CCCCCCC/C=C\CCCCCC)OC(=O)CCCCCCCCCCCCC	0.069	0.87	56936554	1	20.498	Unsaturated_Triglycerides		1
TG46:0	JWVXCFSNEOMSHH-YACUFSJGSA-N	91865745	CCCCCCCCCCCCCCCC(=O)OC[C@@H](COC(=O)CCCCCCCCCCCCC)OC(=O)CCCCCCCCCCCCCCC	0.091	0.8	91865745	8	22.152	Saturated_Triglycerides		1
TG46:1	RSDIQTNCDWUNDP-JHXSWNAYSA-N	56936558	CCCCCCCCCCCCCC(=O)OC[C@H](COC(=O)CCCCCCC/C=C\CCCCCCCC)OC(=O)CCCCCCCCCCCCC	0.075	0.86	56936558	1	21.636	Unsaturated_Triglycerides		1
TG46:2	XUEMVUXNOCIHLG-MOFPORNTSA-N	56936582	CCCCCCCCCCCCCC(=O)OC[C@H](COC(=O)CCCCCCC/C=C\CCCCCC)OC(=O)CCCCCCC/C=C\CCCCCC	0.054	0.86	56936582	1	21.12	Unsaturated_Triglycerides		1
TG46:3	AQARPXOEHQBBQN-OJJDTYCWSA-N	56936561	CCCCCCCCCCCCCC(=O)OC[C@H](COC(=O)CCCCCCC/C=C\C/C=C\C/C=C\CC)OC(=O)CCCCCCCCCCCCC	0.065	0.85	56936561	1	20.982	Unsaturated_Triglycerides		1
TG48:0	PVNIQBQSYATKKL-UHFFFAOYSA-N	11147	CCCCCCCCCCCCCCCC(=O)OCC(COC(=O)CCCCCCCCCCCCCCC)OC(=O)CCCCCCCCCCCCCCC	0.32	0.85	11147	8	23.29	Saturated_Triglycerides		1
TG48:1	FEKLSEFRUGWUOS-DLOIZKPKSA-N	9543986	CCCCCCCCCCCCCCCC(=O)OC[C@H](COC(=O)CCCCCCC/C=C\CCCCCC)OC(=O)CCCCCCCCCCCCCCC	0.068	0.76	9543986	1	22.774	Unsaturated_Triglycerides		1
TG48:2	RUOVJPPUXXFZPC-YZEIBMOJSA-N	9543987	CCCCCCCCCCCCCCCC(=O)OC[C@H](COC(=O)CCCCCCC/C=C\CCCCCC)OC(=O)CCCCCCC/C=C\CCCCCC	0.025	0.79	9543987	1	22.258	Unsaturated_Triglycerides		1
TG48:3	SKGWNZXOCSYJQL-BUTYCLJRSA-N	9543989	CCCCCC/C=C\CCCCCCCC(=O)OCC(OC(=O)CCCCCCC/C=C\CCCCCC)COC(=O)CCCCCCC/C=C\CCCCCC	0.043	0.85	9543989	1	21.742	Unsaturated_Triglycerides		1
TG49:0	TTWJTJMWHOYBPQ-ANFMRNGASA-N	9543988	CCCCCCCCCCCCCCCCC(=O)OC[C@@H](COC(=O)CCCCCCCCCCCCCCC)OC(=O)CCCCCCCCCCCCCCC	0.091	0.82	9543988	8	23.859	Saturated_Triglycerides		1
TG49:1	VYYGQDOPVVYUKW-UKFBYESTSA-N	9543991	CCCCCCCCCCCCCCCC(=O)OC[C@H](COC(=O)CCCCCCC/C=C\CCCCCCC)OC(=O)CCCCCCCCCCCCCCC	0.12	0.86	9543991	1	23.343	Unsaturated_Triglycerides		1
TG49:2	QZYSUBAQYSVFNX-PSMULLBHSA-N	9543993	CCCCCCCCCCCCCCCCC(=O)OC[C@@H](COC(=O)CCCCCCC/C=C\CCCCCC)OC(=O)CCCCCCC/C=C\CCCCCC	0.1	0.84	9543993	1	22.827	Unsaturated_Triglycerides		1
TG50:0	QRJMBNGGFSPTQP-BXJPYAOGSA-N	3246958	[2H]C([2H])(C([2H])(C([2H])([2H])OC(=O)CCCCCCCCCCCCCCC)OC(=O)CCCCCCCCCCCCCCCCC)OC(=O)CCCCCCCCCCCCCCC	0.41	0.9	3246958	8	24.428	Glycols		1
TG50:1	YHMDGPZOSGBQRH-YYSBDVFPSA-N	25240460	CCCCCCCCCCCCCCCC(=O)OC[C@H](COC(=O)CCCCCCC/C=C\CCCCCCCC)OC(=O)CCCCCCCCCCCCCCC	0.28	0.77	25240460	1	23.912	Unsaturated_Triglycerides		1
TG50:2	QEZWFCZNHWUARW-XQCAQTCHSA-N	9544010	CCCCCCCCCCCCCCCCCC(=O)OC[C@@H](COC(=O)CCCCCCC/C=C\CCCCCC)OC(=O)CCCCCCC/C=C\CCCCCC	0.063	0.63	9544010	1	23.396	Unsaturated_Triglycerides		1
TG50:3	UFHNZOACKFBCOM-YXKNDSBASA-N	25240357	CCCCCCCC/C=C\CCCCCCCC(=O)OC[C@@H](COC(=O)CCCCCCC/C=C\CCCCCC)OC(=O)CCCCCCC/C=C\CCCCCC	0.04	0.76	25240357	1	22.88	Unsaturated_Triglycerides		1
TG50:4	PVMBAGXWHHZKFP-JMPJWMFJSA-N	25240359	CCCCCC/C=C\CCCCCCCC(=O)OC[C@H](COC(=O)CCCCCCC/C=C\C/C=C\CCCCC)OC(=O)CCCCCCC/C=C\CCCCCC	0.034	0.79	25240359	1	22.553	Unsaturated_Triglycerides		1
TG50:5	AFTBPUXZTDLRSP-UDQIKIEDSA-N	9544045	CCCCCC/C=C\CCCCCCCC(=O)OC[C@H](COC(=O)CCCCCCC/C=C\C/C=C\C/C=C\CC)OC(=O)CCCCCCC/C=C\CCCCCC	0.043	0.79	9544045	1	22.226	Unsaturated_Triglycerides		1
TG51:1	OZAXLAGNPZMZAD-BOEMPQCLSA-N	9544006	CCCCCCCCCCCCCCCCC(=O)OC[C@H](COC(=O)CCCCCCC/C=C\CCCCCCC)OC(=O)CCCCCCCCCCCCCCCC	0.13	0.86	9544006	1	24.481	Unsaturated_Triglycerides		1
TG51:2	NSNSZGBCOIKUBU-SZOKBDNISA-N	9544013	CCCCCCCCCCCCCCCCC(=O)OC[C@H](COC(=O)CCCCCCC/C=C\CCCCCCC)OC(=O)CCCCCCC/C=C\CCCCCCC	0.28	0.88	9544013	1	23.965	Unsaturated_Triglycerides		1
TG51:3	ISSGPXMQOMAFMJ-DMGKHJLRSA-N	9544023	CCCCCCC/C=C\CCCCCCCC(=O)OCC(OC(=O)CCCCCCC/C=C\CCCCCCC)COC(=O)CCCCCCC/C=C\CCCCCCC	0.22	0.86	9544023	1	23.449	Unsaturated_Triglycerides		1
TG51:4	IIRQXNVLAXQEKB-KBEZCZBDSA-N	9544052	CCCCCCCC/C=C\CCCCCCCC(=O)OC[C@@H](COC(=O)CCCCCCC/C=C\CCCCCC)OC(=O)CCCCCCC/C=C\C/C=C\CCCC	0.12	0.81	9544052	1	23.122	Unsaturated_Triglycerides		1
TG52:0	SDNYRTVJOFMYIW-OIVUAWODSA-N	545690	CCCCCCCCCCCCCCCCCC(=O)OC[C@@H](COC(=O)CCCCCCCCCCCCCCC)OC(=O)CCCCCCCCCCCCCCCCC	0.067	0.86	545690	8	25.566	Saturated_Triglycerides		1
TG52:1	NPCZZYKITFKRQZ-FQUZZJBASA-N	25240360	CCCCCCCCCCCCCCCCCC(=O)O[C@H](COC(=O)CCCCCCCCCCCCCCC)COC(=O)CCCCCCC/C=C\CCCCCCCC	0.26	0.89	25240360	1	25.05	Unsaturated_Triglycerides		1
TG52:2	KGLAHZTWGPHKFF-RISKEULASA-N	25240361	CCCCCCCCCCCCCCCC(=O)OC[C@H](COC(=O)CCCCCCC/C=C\C/C=C\CCCCC)OC(=O)CCCCCCC/C=C\CCCCCCCC	0.13	2.1	25240361	1	24.207	Unsaturated_Triglycerides		1
TG52:4	WHSWXEYWNPTUPW-HNJDVRDNSA-N	25240364	CCCCCCCC/C=C\CCCCCCCC(=O)O[C@H](COC(=O)CCCCCCC/C=C\CCCCCC)COC(=O)CCCCCCC/C=C\C/C=C\CCCCC	0.0017	0.51	25240364	1	23.691	Unsaturated_Triglycerides		0.55
TG52:5	CQZAAIKPSLHIBC-KDJOUNIJSA-N	25240366	CCCCCC/C=C\CCCCCCCC(=O)OC[C@H](COC(=O)CCCCCCC/C=C\C/C=C\CCCCC)OC(=O)CCCCCCC/C=C\C/C=C\CCCCC	0.072	0.8	25240366	1	23.364	Unsaturated_Triglycerides		1
TG53:0	ZJUXHXMIKPSINE-IONAWPRUSA-N	9544181	CCCCCCCCCCCCCCCCCCCCC(=O)OC[C@@H](COC(=O)CCCCCCCCCCCCCCC)OC(=O)CCCCCCCCCCCCCCC	0.15	0.78	9544181	8	26.135	Saturated_Triglycerides		1
TG53:1	WWJIBIGWKGFVAQ-JNSYTQKUSA-N	9544081	CCCCCCCCCCCCCCCCCC(=O)OC[C@@H](COC(=O)CCCCCCC/C=C\CCCCCCC)OC(=O)CCCCCCCCCCCCCCCCC	0.071	0.82	9544081	1	25.619	Unsaturated_Triglycerides		1
TG53:2	RSINITWKVQRWSZ-RFVLVDBCSA-N	9544102	CCCCCCCCCCCCCCCCCC(=O)OC[C@@H](COC(=O)CCCCCCC/C=C\C/C=C\CCCC)OC(=O)CCCCCCCCCCCCCCCCC	0.16	0.83	9544102	1	25.292	Unsaturated_Triglycerides		1
TG53:3	ZNQBEJJYVJSZLM-LEDQTTRKSA-N	9544126	CCCCCCCC/C=C\CCCCCCCC(=O)OC[C@@H](COC(=O)CCCCCCC/C=C\CCCCCCC)OC(=O)CCCCCCC/C=C\CCCCCCCC	0.13	0.85	9544126	1	24.587	Unsaturated_Triglycerides		1
TG53:4	BMSDHYZLQWTKSQ-LSJAAEOESA-N	9544152	CCCCCCCC/C=C\CCCCCCCC(=O)OC[C@@H](COC(=O)CCCCCCC/C=C\C/C=C\CCCC)OC(=O)CCCCCCC/C=C\CCCCCCCC	0.22	0.83	9544152	1	24.26	Unsaturated_Triglycerides		1
TG53:5	QHYAATSKYBYSLG-BXDFBOBBSA-N	9544183	CCCCCCC/C=C\CCCCCCCC(=O)OC[C@H](COC(=O)CCCCCCC/C=C\C/C=C\CCCCC)OC(=O)CCCCCCC/C=C\C/C=C\CCCCC	0.12	0.79	9544183	1	23.933	Unsaturated_Triglycerides		1
TG54:0	DCXXMTOCNZCJGO-UHFFFAOYSA-N	11146	CCCCCCCCCCCCCCCCCC(=O)OCC(COC(=O)CCCCCCCCCCCCCCCCC)OC(=O)CCCCCCCCCCCCCCCCC	0.37	0.88	11146	8	26.704	Saturated_Triglycerides		1
TG54:1	YFFIQXNTTVSKJC-NZEOUKRFSA-N	16058371	CCCCCCCCCCCCCCCCCC(=O)OC[C@H](COC(=O)CCCCCCC/C=C\CCCCCCCC)OC(=O)CCCCCCCCCCCCCCCCC	0.18	0.88	16058371	1	26.188	Unsaturated_Triglycerides		1
TG54:2	RYNHWWNZNIGDAQ-BMTCQUSZSA-N	16058372	CCCCCCCCCCCCCCCCCC(=O)OC[C@H](COC(=O)CCCCCCC/C=C\CCCCCCCC)OC(=O)CCCCCCC/C=C\CCCCCCCC	0.071	0.78	16058372	1	25.672	Unsaturated_Triglycerides		1
TG54:3	PHYFQTYBJUILEZ-IUPFWZBJSA-N	5497163	CCCCCCCC/C=C\CCCCCCCC(=O)OCC(OC(=O)CCCCCCC/C=C\CCCCCCCC)COC(=O)CCCCCCC/C=C\CCCCCCCC	0.042	0.57	5497163	1	25.156	Unsaturated_Triglycerides		1
TG54:4	BRLGHZXETDWABO-NOFIOOQLSA-N	9544255	CCCCCCCCCCCCCCCCCC(=O)OC[C@H](COC(=O)CCCCCCC/C=C\C/C=C\C/C=C\CC)OC(=O)CCCCCCC/C=C\CCCCCCCC	0.076	0.71	9544255	1	25.018	Unsaturated_Triglycerides		1
TG54:5	VVEBTVMJPTZDHO-YQFZQLSNSA-N	25240373	CCCCCCCC/C=C\CCCCCCCC(=O)OC[C@H](COC(=O)CCCCCCC/C=C\C/C=C\CCCCC)OC(=O)CCCCCCC/C=C\C/C=C\CCCCC	0.065	0.7	25240373	1	24.502	Unsaturated_Triglycerides		1
TG54:6	HBOQXIRUPVQLKX-BBWANDEASA-N	5322095	CCCCC/C=C\C/C=C\CCCCCCCC(=O)OCC(OC(=O)CCCCCCC/C=C\C/C=C\CCCCC)COC(=O)CCCCCCC/C=C\C/C=C\CCCCC	0.052	0.77	5322095	1	24.175	Unsaturated_Triglycerides		1
TG54:8	BMPVTDWOWBNPJU-NYRSPQLFSA-N	9544413	CCCCC/C=C\C/C=C\C/C=C\C/C=C\CCCC(=O)OC[C@@H](COC(=O)CCCCCCC/C=C\C/C=C\CCCC)OC(=O)CCCCCCC/C=C\C/C=C\CCCC	0.47	0.92	9544413	1	23.521	Unsaturated_Triglycerides		1
TG56:1	OCYFAHIHWCVZKS-FHSLLVMSSA-N	9544345	CCCCCCCCCCCCCCCCCCCC(=O)OC[C@@H](COC(=O)CCCCCCCCCCCCCCCCC)OC(=O)CCCCCCC/C=C\CCCCCCCC	0.046	0.79	9544345	1	27.326	Unsaturated_Triglycerides		1
TG56:2	PDEQUPGHMOMBFC-FYEHETCMSA-N	9544390	CCCCCCCCCCCCCCCCCCCC(=O)OC[C@@H](COC(=O)CCCCCCCCCCCCCCCCC)OC(=O)CCCCCCC/C=C\C/C=C\CCCCC	0.09	0.83	9544390	1	26.999	Unsaturated_Triglycerides		1
TG56:3	QXMHHXQBBKDSSL-BAQZNRHJSA-N	9544447	CCCCCCCC/C=C\CCCCCCCCCC(=O)OC[C@@H](COC(=O)CCCCCCC/C=C\CCCCCCCC)OC(=O)CCCCCCC/C=C\CCCCCCCC	0.068	0.8	9544447	1	26.294	Unsaturated_Triglycerides		1
TG56:4	YONCDTJKIZDSKQ-IYASBODOSA-N	25240379	CCCCCCCC/C=C\CCCCCCCCCC(=O)OC[C@@H](COC(=O)CCCCCCC/C=C\CCCCCCCC)OC(=O)CCCCCCC/C=C\C/C=C\CCCCC	0.89	0.98	25240379	1	25.967	Unsaturated_Triglycerides		1
TG56:5	UHEJWASONFIROS-YPSHDQQVSA-N	25240380	CCCCCCCC/C=C\CCCCCCCCCC(=O)OC[C@@H](COC(=O)CCCCCCC/C=C\C/C=C\CCCCC)OC(=O)CCCCCCC/C=C\C/C=C\CCCCC	0.14	1.4	25240380	1	25.64	Unsaturated_Triglycerides		1
TG56:6	ZTNDRFCABXFVMY-WJTCTALZSA-N	9544625	CCCCC/C=C\C/C=C\CCCCCCCCCC(=O)OC[C@@H](COC(=O)CCCCCCC/C=C\C/C=C\CCCCC)OC(=O)CCCCCCC/C=C\C/C=C\CCCCC	0.39	0.87	9544625	1	25.313	Unsaturated_Triglycerides		1
TG56:7	DODZUDCYRVWEOJ-GKZBLMSTSA-N	9544695	CCCCC/C=C\C/C=C\CCCCCCCC(=O)OC[C@H](COC(=O)CCCCCC/C=C\C/C=C\C/C=C\CCCCC)OC(=O)CCCCCCC/C=C\C/C=C\CCCCC	0.56	0.91	9544695	1	24.986	Unsaturated_Triglycerides		1
TG56:8	UBGUHMDKBGQUND-VPFWBQFRSA-N	9544762	CCCCCCCCCCCCCCCC(=O)OC[C@H](COC(=O)CCC/C=C\C/C=C\C/C=C\C/C=C\CCCCC)OC(=O)CCC/C=C\C/C=C\C/C=C\C/C=C\CCCCC	0.32	1.1	9544762	1	24.848	Unsaturated_Triglycerides		1
TG58:1	OWZMHFAFGQCCNI-FBXRAONGSA-N	25240381	CCCCCCCCCCCCCCCCCCCC(=O)OC[C@@H](COC(=O)CCCCCCC/C=C\CCCCCCCC)OC(=O)CCCCCCCCCCCCCCCCCCC	0.34	0.89	25240381	1	28.464	Unsaturated_Triglycerides		1
TG58:2	GXWBCAVCOMAOHT-VMCJOIRWSA-N	9545277	CCCCC/C=C\C/C=C\CCCCCCCC(=O)OC[C@H](COC(=O)CCC/C=C\C/C=C\C/C=C\C/C=C\CCCCC)OC(=O)CCC/C=C\C/C=C\C/C=C\C/C=C\CCCCC	0.023	0.73	9545277	1	25.143	Unsaturated_Triglycerides		1
TG58:3	RFMSTHTUAZETPD-JJPHLYBUSA-N	9544748	CCCCCCCC/C=C\CCCCCCCCCC(=O)OC[C@@H](COC(=O)CCCCCCC/C=C\CCCCCCCC)OC(=O)CCCCCCCCC/C=C\CCCCCCCC	0.053	0.79	9544748	1	27.432	Unsaturated_Triglycerides		1
TG58:4	CCKRHDUCFMOBKX-AAINFQTBSA-N	9544835	CCCCCCCCCCCCCCCCCCCC(=O)O[C@H](COC(=O)CCCCCCCCCCCCCCCCC)COC(=O)CCC/C=C\C/C=C\C/C=C\C/C=C\CCCCC	0.31	0.89	9544835	1	27.483	Unsaturated_Triglycerides		1
TG58:6	GSNFRUMSEHHPSY-LCXCSEBNSA-N	9544977	CCCCCCCC/C=C\CCCCCCCCCC(=O)O[C@H](COC(=O)CCCCCCC/C=C\CCCCCCCC)COC(=O)CCC/C=C\C/C=C\C/C=C\C/C=C\CCCCC	0.37	0.92	9544977	1	26.451	Unsaturated_Triglycerides		1
TG58:8	KWIGMCRWEINBIR-HUPVKWKYSA-N	9545124	CCCCCCCCCCCCCCCCCC(=O)OC[C@H](COC(=O)CCC/C=C\C/C=C\C/C=C\C/C=C\CCCCC)OC(=O)CCC/C=C\C/C=C\C/C=C\C/C=C\CCCCC	0.72	0.95	9545124	1	25.986	Unsaturated_Triglycerides		1
TG58:9	RVXFSLZMZOFGEQ-SWIIBWKZSA-N	9545200	CCCCCCCC/C=C\CCCCCCCC(=O)OC[C@H](COC(=O)CCC/C=C\C/C=C\C/C=C\C/C=C\CCCCC)OC(=O)CCC/C=C\C/C=C\C/C=C\C/C=C\CCCCC	0.35	0.9	9545200	1	25.47	Unsaturated_Triglycerides		1
TG60:1	YNDXXWKSWMKVGO-HZLQDPIMSA-N	9544965	CCCCCCCCCCCCCCCCCCCC(=O)OC[C@H](COC(=O)CCCCCCCCC/C=C\CCCCCCCC)OC(=O)CCCCCCCCCCCCCCCCCCC	0.015	0.66	9544965	1	29.602	Unsaturated_Triglycerides		1
TG60:11	ASSZWZBQIXMMKM-SYTPEAHJSA-N	9545730	CCCCC/C=C\C/C=C\C/C=C\CCCCCCC(=O)OC[C@H](COC(=O)CCC/C=C\C/C=C\C/C=C\C/C=C\CCCCC)OC(=O)CCC/C=C\C/C=C\C/C=C\C/C=C\CCCCC	0.22	0.86	9545730	1	25.954	Unsaturated_Triglycerides		1
TG60:2	QPNVLDQSHXVPMG-JMYPUKFOSA-N	9545040	CCCCCCCCCCCCCCCCCCCC(=O)OC[C@H](COC(=O)CCCCCCCCC/C=C\CCCCCCCC)OC(=O)CCCCCCCCC/C=C\CCCCCCCC	0.042	0.75	9545040	1	29.086	Unsaturated_Triglycerides		1
TG62:1	TZLOSVAFXBPUQT-VBMMIZSXSA-N	9545526	CCCCCCCCCCCCCCCCCCCCCC(=O)OC[C@H](COC(=O)CCCCCCCCCCCCCCCCCCC)OC(=O)CCCCCCCCC/C=C\CCCCCCCC	0.21	0.79	9545526	1	30.74	Unsaturated_Triglycerides		1
